1 Multiple probabilistic models extract features from protein sequence data  
2 and resolve functional diversity of very different protein families

3 R. Vicedomini<sup>1,2,\*</sup>, J.P. Bouly<sup>1,3,\*</sup>, E. Laine<sup>1</sup>, A. Falciatore<sup>1,3</sup> and A. Carbone<sup>1,4†</sup>

4 <sup>1</sup> Sorbonne Université, CNRS, IBPS, Laboratoire de Biologie Computationnelle et Quantitative - UMR 7238, 4 place  
5 Jussieu, 75005 Paris, France

6 <sup>2</sup> Sorbonne Université, Institut des Sciences du Calcul et des Données

7 <sup>3</sup> CNRS, Sorbonne Université, Institut de Biologie Physico-Chimique, Laboratory of Chloroplast Biology and Light  
8 Sensing in Microalgae - UMR7141, Paris, France

9 <sup>4</sup> Institut Universitaire de France, Paris 75005, France

10 March 9, 2021

---

\*The first two authors share equal contribution.

†Corresponding author: [alessandra.carbone@lip6.fr](mailto:alessandra.carbone@lip6.fr)

## Abstract

Sequence functional classification has become a critical bottleneck in understanding the myriad of protein sequences that accumulate in our databases. The great diversity of homologous sequences hides, in many cases, a variety of functional activities that cannot be anticipated. Their identification appears critical for a fundamental understanding of living organisms and for biotechnological applications.

ProfileView is a sequence-based computational method, designed to functionally classify sets of homologous sequences. It relies on two main ideas: the use of multiple probabilistic models whose construction explores evolutionary information in available databases, and a new definition of a representation space where to look at sequences from the point of view of probabilistic models combined together. ProfileView classifies families of proteins for which functions should be discovered or characterised within known groups.

We validate ProfileView on seven classes of widespread proteins, involved in the interaction with nucleic acids, amino acids and small molecules, and in a large variety of functions and enzymatic reactions. ProfileView agrees with the large set of functional data collected for these proteins from the literature regarding the organisation into functional subgroups and residues that characterize the functions. Furthermore, ProfileView resolves undefined functional classifications and extracts the molecular determinants underlying protein functional diversity, showing its potential to select sequences towards accurate experimental design and discovery of new biological functions.

ProfileView proves to outperform three functional classification approaches, CUPP, PANTHER, and a recently developed neural network approach based on Restricted Boltzmann Machines. It overcomes time complexity limitations of the latter.

*Key words:* genome; metagenome; functional classification; protein classification; probabilistic model; profile; cryptochrome; photolyase; photoreceptor; WW domain; glycoside hydrolase; Radical SAM; Haloacid Dehalogenase; B12-binding domain containing; methylthiotransferase; SPASM/twitch domain containing.

## 36 1 Introduction

37 The functional classification of biological sequences has become a fundamental bottleneck to the under-  
38 standing of the ever-increasing genomic and metagenomic sequence data accumulating in our databases.  
39 This quest depends on the correct domain annotation of coding genes (Ponting and Dickens, 2001; Prakash  
40 and Taylor, 2012; De Filippo *et al.*, 2012), which, in the past, was handled by sequence homology-, and  
41 feature-based approaches.

42 The first and most intuitive approach searches for homologous sequences to already known protein or  
43 domain sequences (Hawkins *et al.*, 2006; Wass and Sternberg, 2008; Loewenstein *et al.*, 2009; Clark and  
44 Radivojac, 2011; Törönen *et al.*, 2018) and does it either by a direct pairwise sequence alignment or by  
45 passing through protein signatures, which are descriptions of protein or domain families derived from multiple  
46 sequence alignments. It is based on the “orthology-function conjecture” for which orthologues carry out  
47 biologically equivalent functions in different organisms, in contrast to paralogues whose functions typically  
48 diverge after duplication (Gabaldón and Koonin, 2013). Due to complex processes of evolution, many  
49 homologues diversified their functions and the sequence homology approach should be applied with great  
50 awareness: different similarity levels in homology should induce different levels in functional annotation  
51 transfer. This represents a serious pitfall for the approach. A second pitfall, is linked to the production of  
52 probabilistic models, describing conserved characteristics across sequences. Indeed, these families might be  
53 made of a few members very divergent from each others (rare) or of a continuum of thousands of sequences  
54 due to a lack of functional/evolutionary pressure, which challenges the family definition and produces super-  
55 family/clan totally degenerated models (most frequent) of restrained use.

56 The second class of methods is based on the selection of an appropriate set of features (like short sequence  
57 segments or wavelet decompositions) (Karchin *et al.*, 2005; Wen *et al.*, 2005; Wan and Jones, 2020; Bonetta  
58 and Valentino, 2020). Other computational schemas use protein structure (Pazos and Sternberg, 2004; Pal  
59 and Eisenberg, 2005; Lee *et al.*, 2007; Dawson *et al.*, 2017), phylogenetics and evolutionary relationships  
60 (Eisen, 1998; Engelhardt *et al.*, 2005, 2011; Gaudet *et al.*, 2011; Sahraeian *et al.*, 2015; Gumerov and Zhulin,  
61 2020), interaction and association data (Deng *et al.*, 2002; Vazquez *et al.*, 2003; Letovsky and Kasif, 2003;  
62 Nabieva *et al.*, 2005; Sharan *et al.*, 2007; Cao *et al.*, 2014; Pham and Lichtarge, 2020) and a combination  
63 of those (Shin *et al.*, 2007; Furnham *et al.*, 2012; Boari de Lima *et al.*, 2016; Cao and Cheng, 2016; Zhang  
64 *et al.*, 2017; Kulmanov and Hoehndorf, 2020), with the evident dependence on the availability of different  
65 data-types and a large and very diversified dataset of sequences.

66 Novel computational approaches classifying sequences by function and overcoming the limitations intrinsic  
67 to existing methods would help screening sequences to design accurate experiments directed to functional  
68 testing and to discover new functions. ProfileView was conceived for this purpose.

69 ProfileView is a computational method able to classify hundreds/thousands of homologous sequences into

70 functional groups. It is strongly based on the understanding of the structure of the sequence data imposed  
71 by the evolutionary history of the sequences. The first main step of ProfileView is to encode functional and  
72 structural information belonging to the protein family into multiple probabilistic models that capture the  
73 diversity of the homologous sequences in the family. Based on the set of different models for the family,  
74 the second main step of ProfileView is to define an original sequence space which organises sequences by  
75 function. Biologically interpretable information and functional motifs are extracted from the classification  
76 process. That is, the family members are organised in a tree structure, where subfamily delineations are  
77 possible thanks to the hierarchical organisation. The presence of multiple functions in a family or subfamily  
78 makes it desirable to subdivide its members into smaller groups in order to capture the differences in function-  
79 related features at a level lower than the subfamily. ProfileView representative models and their specific  
80 conserved motifs proved to be good indicators of this functional delineation. ProfileView can be applied on  
81 a large scale on very diverse datasets.

82 In the past, the usage of multiple probabilistic models demonstrated to be powerful in the context of  
83 domain annotation (Bernardes *et al.*, 2016; Ugarte *et al.*, 2018), where they showed to be highly accurate  
84 on full genomes and metagenomic/metatranscriptomic datasets, allowing for the discovery of new sequences  
85 enriching protein families (Fortunato *et al.*, 2016; Amato *et al.*, 2017). Here, these models are not used to  
86 discover homologous sequences but to capture the variety of functional motifs characterizing a protein family.  
87 Their construction demands a relatively small number of sequences (a minimum of 20), and therefore, they  
88 can encode even functional motifs that are poorly represented in sequence space, generating a possibly very  
89 large motifs diversification.

90 To highlight its power and generality, we applied ProfileView to seven protein families whose members are  
91 characterised by a large functional diversity, multiple members are functionally well-characterised proteins  
92 and subfamilies delineations have been validated experimentally together with their functional motifs: the  
93 Cryptochrome/Photolyase Family (CPF), the WW domains, the glycoside hydrolase enzymes GH30 family  
94 and four protein subgroups belonging to two enzyme superfamilies, the Haloacid Dehydrogenase (HAD/ $\beta$ -  
95 PGM/Phosphatase-like subgroup) and the Radical SAM (B12-binding domain containing, Methylthiotrans-  
96 ferase and SPASM/twitch domain containing). These families and subgroups allowed us to demonstrate  
97 the power in feature extraction, the simplicity in the interpretability of the results and the methodological  
98 approach, and the computational efficiency of ProfileView compared to a recent artificial neural networks  
99 approach to sequence classification (Tubiana *et al.*, 2019). Comparisons are also made with the PANTHER  
100 classification system (Mi *et al.*, 2012, 2013) and the CUPP platform (Barrett and Lange, 2019). For each  
101 protein family, ProfileView agrees with all available experimental data. Many homologous protein sequences  
102 yet to be classified were classified by ProfileView in this work.

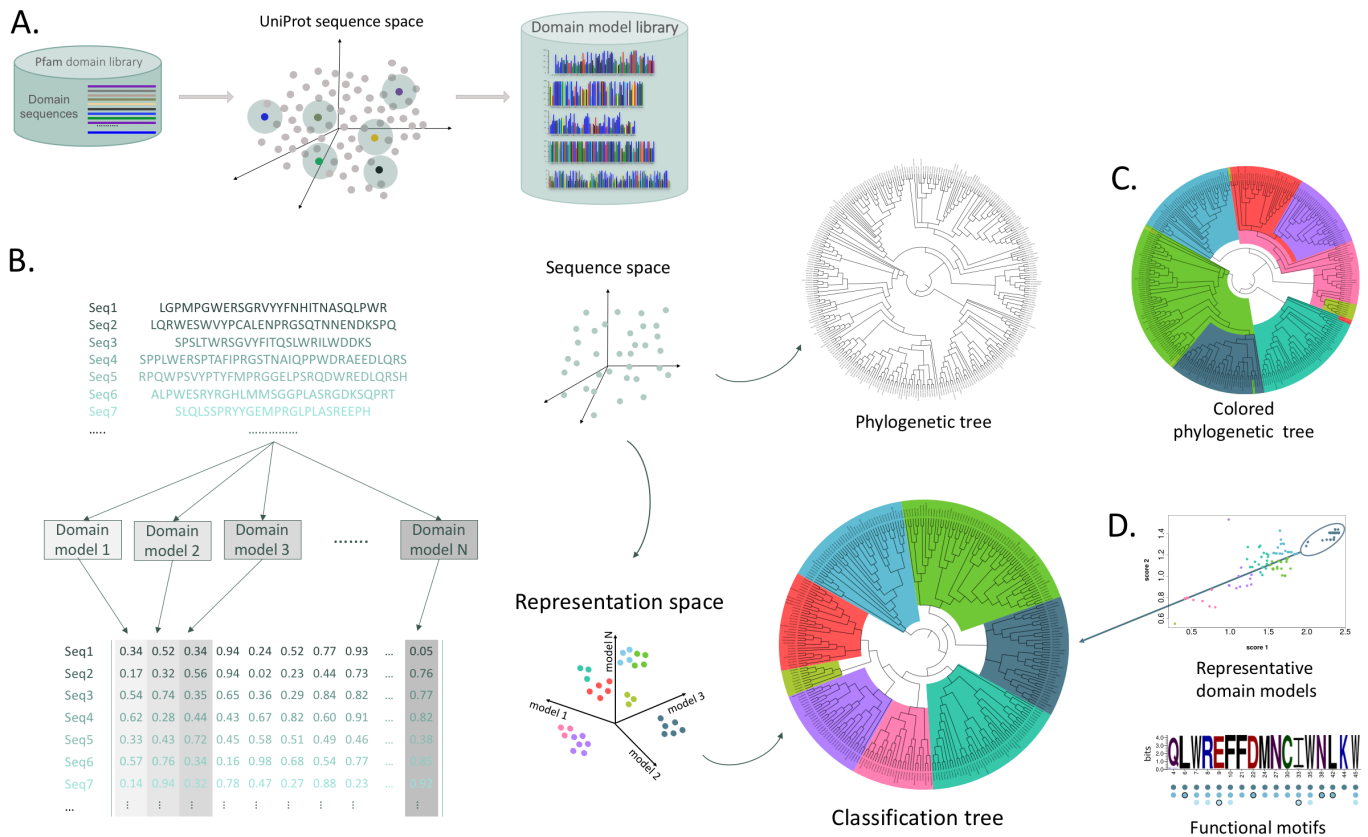

**Figure 1: Schema of the ProfileView approach.** **A.** Model library construction in ProfileView: all representative sequences from the Pfam domain library are selected for the domain under study. For each representative domain sequence (coloured dots), ProfileView searches for close sequences in UniProt and constructs with HH-Blits several probabilistic models making a library of models for the domain. **B.** Sequences (dots in sequence space, top center) code for proteins with different functions. ProfileView defines a probabilistic mapping from sequences onto the representation space (bottom center) which is indicative of the function of the corresponding protein sequences. The mapping is realised through the contribution of the domain probabilistic models that evaluate the probability of their match against each sequence. Each protein sequence is mapped into a vector of real numbers (coloured row in the matrix, bottom) representing the quality of the match of all models. In sequence space, sequences organise in a phylogenetic tree and, in representation space, they organise in a classification tree based on their distance. ProfileView clusters sequences in the representation space and colors them to indicate a shared function. This coloring is reported in the classification tree. **C.** Phylogenetic tree where sequences are colored as in the classification tree (B). Coloring shows a different organisation within the two trees. **D.** The classification tree allows to identify best representative models for subtrees and their characteristic functional motifs.

## 103 Results

### 104 Converting sequences in multidimensional vectors with probabilistic models

105 Our methodological approach to sequence classification, ProfileView, is outlined hereafter and illustrated  
106 in **Fig. 1**. ProfileView takes as input a set of homologous sequences and a protein domain, and returns  
107 a classification of the sequences in functional subgroups together with functional motifs characterising the  
108 subgroups.

109 The first main idea of ProfileView is to extract conserved patterns from the space of available sequences  
110 (**Fig. 1A**; see Methods) through the construction of many probabilistic models for a protein family that  
111 should sample the diversity of the available homologous sequences and reflect shared structural and functional  
112 characteristics. These models, called Clade-Centered Models or CCM (Bernardes *et al.*, 2016; Ugarte *et al.*,  
113 2018), are built as conservation profiles. Compared to consensus models (*e.g.*, a pHMM (Eddy, 1998)), they  
114 avoid the loss of functional signals when distant sequences are considered. To construct them, we consider  
115 the *full* set of sequences  $S^i$  associated with a Pfam domain  $D^i$  (Finn *et al.*, 2014) and, for each sequence  
116  $s_j \in S^i$ , we construct a *clade-centered* profile HMM (CCM) by retrieving a set of homologous sequences  
117 close to  $s_j$  from UniProt (see Methods). Such a model displays features characteristic of  $s_j$  and that  
118 might differ from other domain sequences  $s_k \in S^i$ . The more  $s_j$  and  $s_k$  are divergent, the more CCMs are  
119 expected to highlight different features. In order to capture feature characteristics of protein interaction sites  
120 and/or determinants of functional specificity for protein families likely sharing the same domain architecture,  
121 we built highly specific clade-centered models by considering domain sequences in UniProt that display a  
122 high sequence identity to  $s_j$ . Note that in the past, we constructed CCMs to improve domain annotation  
123 (Bernardes *et al.*, 2016; Ugarte *et al.*, 2018) and, for those models, we employed less restrictive conditions  
124 for sequence selection in UniProt.

125 The second main idea of ProfileView is to use CCMs to embed input sequences into a multidimensional  
126 representation space, where each dimension is associated with a CCM (**Fig. 1B-D**). Namely, for each input  
127 sequence to be classified, each model is matched against the sequence, and the value of the match, expressing  
128 how close a model is to the sequence, is recorded as a vector entry (**Fig. 1B**, left). This space is called  
129 “functional space” because nearby sequences, matching similar profile motifs, are supposed to share the same  
130 functional motifs. ProfileView clusters sequences (converted into vectors) within this space by hierarchical  
131 clustering and provides a functional classification tree (**Fig. 1B**, bottom right). As illustrated in **Fig. 1C**,  
132 the topology of the functional tree is not expected to match the one of the phylogenetic tree. Some of the  
133 subtrees of the classification tree will be associated with representative probabilistic models and functional  
134 motifs (**Fig. 1D**). Indeed, representative models will be used to subdivide family or subfamily members into  
135 smaller groups, in order to capture differences in function-related features of the family, *i.e.* creating groups  
136 that preferably include only one function. All details of the ProfileView pipeline are explained in Method.

| Superfamily/<br>Family                  | Subgroup                               | #seqs | #filt<br>seqs | #func<br>seqs | Pfam domain<br>(accession code)                        | Clust<br>cond | #models |
|-----------------------------------------|----------------------------------------|-------|---------------|---------------|--------------------------------------------------------|---------------|---------|
| Cryptochrome/<br>Photolyase (CPF)       | –                                      | 397   | 307           | 72            | FAD (PF03441)                                          | –             | 3735    |
| WW domain                               | –                                      | 349   | 349           | 54            | WW (PF00397)                                           | –             | 3733    |
| Glycoside hydrolase<br>family 30 (GH30) | –                                      | 1803  | 1675          | 695           | Glyco-hydro-30 (PF02055)<br>Glyco-hydro-30-2 (PF14587) | –             | 1894    |
| Haloacid<br>Dehalogenase                | HAD/ $\beta$ -PGM/<br>Phosphatase-like | 391   | 259           | 259           | HAD (PF12710)<br>HAD.2 (PF13419)                       | $\geq 40\%$   | 4075    |
| Radical SAM                             | B12-binding<br>domain containing       | 273   | 258           | 258           | B12-binding (PF02310)<br>B12-binding_2 (PF02607)       | $\geq 60\%$   | 3504    |
|                                         | Methyltransferase                      | 400   | 393           | 393           | Radical.SAM (PF04055)                                  | $\geq 40\%$   | 4501    |
|                                         | SPASM/twitch<br>domain containing      | 128   | 29            | 29            | SPASM (PF13186)                                        | $\geq 60\%$   | 2663    |
|                                         |                                        | 128   | 115           | 115           | Radical.SAM (PF04055)                                  | $\geq 40\%$   | 4501    |

Table I: Summary of the characteristics of the protein families used for the evaluation: number of sequences, number of sequences after filtering (steps II and III of the pipeline), number of sequences with known function, Pfam domain used for ProfileView classification, MMseq2 clustering condition to identify representative sequences in Pfam (“–” indicates no clustering), number of models constructed for ProfileView analysis. Further features are described in **Table S1** and **Table S2**.

| Protein family                                   | TP  | TP+FN | Recall |
|--------------------------------------------------|-----|-------|--------|
| Cryptochrome/Photolyase (CPF)                    | 71  | 72    | 98.6   |
| WW domain                                        | 54  | 54    | 100    |
| Glycoside hydrolase family 30 on EC numbers      | 34  | 34    | 100    |
| Glycoside hydrolase family 30 on CAZy families   | 694 | 695   | 99.8   |
| HAD/ $\beta$ -PGM/Phosphatase-like               | 259 | 259   | 100    |
| B12-binding domain containing                    | 253 | 258   | 98.1   |
| Methyltransferase                                | 380 | 393   | 96.7   |
| SPASM/twitch domain containing with SPASM domain | 29  | 29    | 100    |
| SPASM/twitch domain containing with Radical SAM  | 114 | 115   | 99.1   |

Table II: **Summary of ProfileView performance in classifying functionally characterised sequences.** To evaluate what proportion of sequences with a characterised function (TP+FN; see column “# func seqs” in **Table I**) is correctly classified (TP) by ProfileView, we use the Recall measure (TP/TP+FN; see Methods).

### 137 Seven protein families analysed with ProfileView

138 ProfileView was ran on seven different protein families listed in **Table I** (see **Table S1** and **Table S2** for  
139 further characteristics) and was validated on their known functionally characterised sequences. In **Table II**,  
140 we provide a quick summary of ProfileView performance by reporting what proportion of sequences is  
141 correctly classified by ProfileView for each protein family (see Methods). ProfileView identified a large  
142 number of functionally known positions and specific protein residues in interaction with either nucleic acids,  
143 amino acids or small molecules. For two families, the Cryptochrome/Photolyase Family (CPF) and the  
144 WW domain family, we shall show in detail how ProfileView can provide a functional classification for a  
145 large number of functionally uncharacterised sequences, and novel information on conserved amino acids  
146 that could be useful to design testing experiments.

## 147 ProfileView on the CPF family

148 The Cryptochrome/Photolyase Family (CPF), involved in the interaction with nucleic acids, amino acids and  
149 small molecules, is widely distributed in all kingdoms of life (Jaubert *et al.*, 2017; Sancar, 2003; Brettel and  
150 Byrdin, 2010; Chaves *et al.*, 2011). CPF members share the same fold, yet can perform very different func-  
151 tions and have completely different partners: cryptochromes (CRY) are mainly photoreceptors using light  
152 to activate specific signalling pathways; some CRY also acts as light-independent transcriptional regulators  
153 of the circadian clock; photolyases (PL) are light-activated enzymes repairing UV-damaged DNA (CPD or  
154 (6-4) lesions). All CPFs non-covalently bind FAD (Flavin Adenine Dinucleotide) and share a mechanism of  
155 FAD photoreduction by intra-protein electron transfer (Björn, 2015). The different CPF functional classes  
156 are described in **Supplemental File** (section 1) and listed in the inset legend of **Fig. 2** (bottom right).

157 In our analysis, we make the hypothesis that the FAD (flavin adenine dinucleotide) binding domain,  
158 occurring in all CPF sequences, contains all functional information leading to a functional diversification of  
159 the family. Indeed, the FAD binding domain is known to non-covalently bind the FAD chromophore which  
160 can be in different oxidation and protonation states (Sancar, 2003) specifically associated with different  
161 functions. It is also known to interact specifically either with the damaged DNA, with other domains  
162 present in CPF proteins (*e.g.*, C-ter extensions in some photoreceptor cryptochromes) or with other protein  
163 partners (Czarna *et al.*, 2013).

164 ProfileView is validated on two different types of data: functionally characterised CPF sequences and  
165 functionally characterised positions within CPF sequences. These latter are compiled in a manually cu-  
166 rated list of positions (**Supplemental File** “CPF\_mutants\_used\_for\_validation.xlsx”) from the literature.  
167 Furthermore, we combined them with structural modelling to analyse CPF subgroups in detail.

168 **Validation of ProfileView on the functional diversity of CPF members.** The ProfileView repre-  
169 sentation space shows a consistent functional organisation of CPF sequences (**Fig. 2C** and **Fig. S1**) since  
170 sequences known for having the same functional characterisation occur together in large subtrees of the Pro-  
171 fileView classification tree. The perfect split of 71 out of 72 functionally characterised CPF sequences within  
172 the 11 subtrees allows us to uniquely associate each subtree with a known functional class (see **Table S3**).  
173 This provides the first proof of the method’s classification power.

174 Most importantly, at the root, the ProfileView tree topology organises large subtrees consistently with  
175 known functional classes (**Fig. 3A**). Namely, the ProfileView tree separates light-independent circadian  
176 transcriptional regulator CRYs from the light-dependent (6-4) photolyases (PLs) and animal photoreceptor  
177 cryptochromes (PR CRY; (**Fig. 3E**, top)). It also clearly separate the DNA repair (6-4) PL from the  
178 PR CRY. It reconciles classes I and III cyclobutane pyrimidine dimer (CPD) PLs into a single subtree,  
179 while keeping them distinct, and it clearly separates them from plant and plant-like PR CRYs (**Fig. 3F**,  
180 top). For the characterised sequences displaying double function (**Fig. S1**), their DNA repair/photolyase



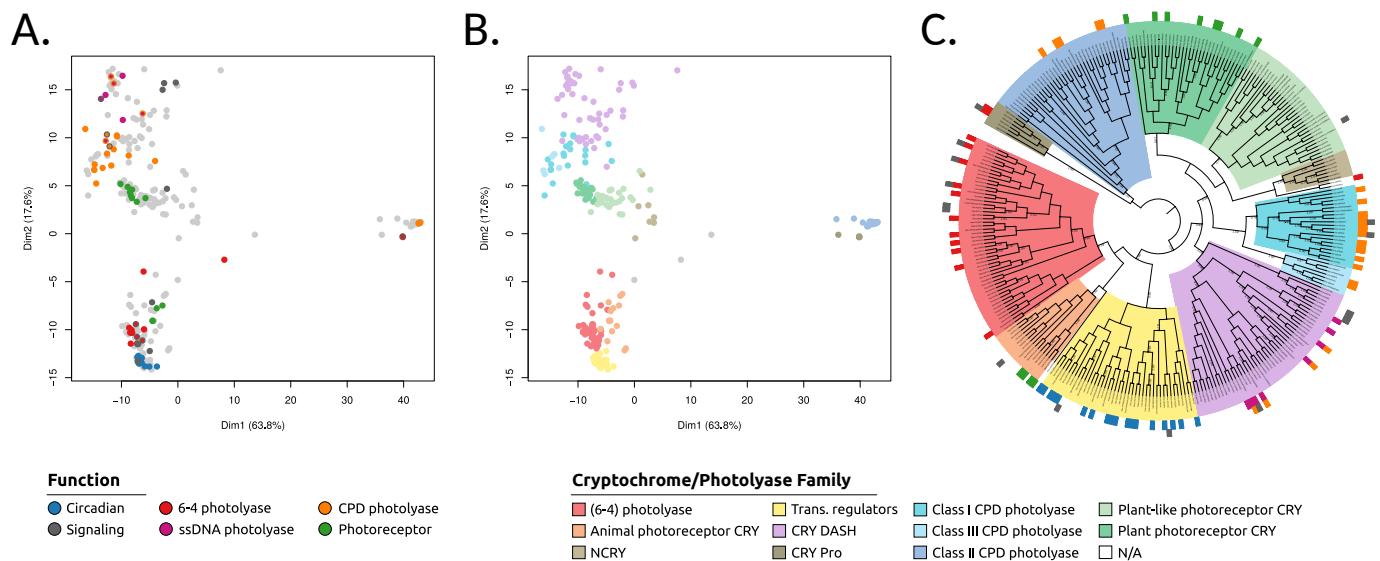

**Figure 2: ProfileView representation space and classification tree for the CPF family, and compatibility with experimental work.** **A.** 2-dimensional projection of the ProfileView representation space for 307 FAD-binding domain CPF sequences obtained by Principle Component Analysis (PCA). The axes correspond to the first and second PCA components explaining the 63.8% and 17.6% of the dispersion, respectively. Colors correspond to sequences that are either experimentally functionally classified (see the colour legend “Function”) or unclassified (light grey). When a sequence is known to have a double function, it is reported with two colours (the inside colour refers to the known primary function). **B.** As in A, where unclassified points in A are classified by using hierarchical clustering (see the colour legend “Cryptochrome/Photolyase Family”). **C.** The ProfileView classification tree is a finer representation of the hierarchical clustering realised on the high dimensional representation space and illustrated in B. Colors of subtrees are identified by representative models and correspond to known CPF classes (inset legend, right), with the exception of the NCRY subtree. External coloured labels define known functions for the sequences (inset legend, left). Some of the 307 sequences are known to hold multiple functions and are labelled by two colors. The function “signalling” (dark grey) refers to signalling processes of different nature (photoreceptor, transcription, unknown). Numbers on the internal nodes correspond to the percentage of sequences in the corresponding subtree that are separated from the remaining sequences in the tree by the best representative model occurring in the model library (see **Fig. S1** for details).

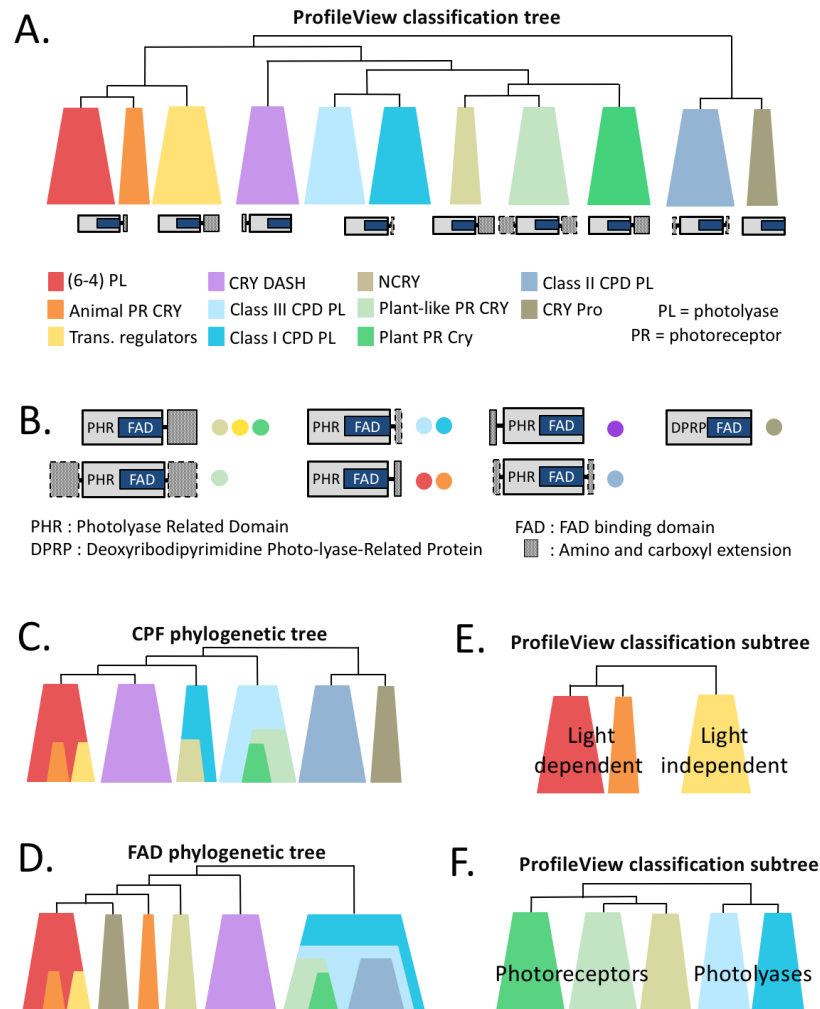

**Figure 3: Topological comparison between the ProfileView classification tree and the phylogenetic trees for the CPF family and the FAD binding domain.** **A.** Schema illustrating the topological structure of the ProfileView tree in **Fig. 2C** and **Fig. S1**. Colors correspond to groups of sequences clustering together and comprising sequences with known function (bottom). The domain architectures known to be characteristic of each subtree is reported (see **B** for more details). **B.** Domain architectures for proteins belonging to different subtrees of **A** are reported (colours as in **A**). **C-** and **N-**terminal regions are indicated with grey boxes. Dotted border lines indicate terminal regions only present occasionally in an architecture. **C.** Scheme of the main topological structure of the CPF phylogenetic tree constructed from the 307 CPF sequences containing the FAD binding domain. Colors as in **A**. See the CPF phylogenetic tree in **Fig. S3**. **D.** Scheme of the main topological structure of the FAD phylogenetic tree constructed from the 307 FAD-binding domain sequences. Colors as in **A**. See the FAD phylogenetic tree in **Fig. S4**. **E, F.** Two zooms on subtrees of the ProfileView classification tree involving classes of CPF sequences described in **A**. Colors as in **A**.

181 activity (either CPD or (6-4)) is consistently determined by ProfileView that groups these sequences in  
182 the photolyase subtrees. At the best of our knowledge, these sharp separations, in agreement with known  
183 functional characterisations, have never been obtained by sequence analysis before.

184 Interestingly, the ProfileView tree allowed for the identification of a yet functionally uncharacterized  
185 subtree (named NCRY; see **Fig. 2C** and **Fig. 3A**) of proteins showing strong sequence divergence. The  
186 same subtree was also identified by sequence similarity network analysis in (Emmerich *et al.*, 2020) without  
187 inferring any functional classification for it, and by the phylogenetic tree based on the FAD binding domain  
188 in CPF sequences (FAD tree, for short; **Fig. 3D**). ProfileView positions NCRY close to the Plant PR CRY  
189 and plant-like PR CRY. In contrast, the phylogenetic tree of CPF sequences (CPF tree, for short) includes  
190 NCRY within class I CPD PL and the FAD tree places it close to the animal PR CRY and CRY DASH. To  
191 our knowledge only one protein from this family has been characterised and it was shown to bind FAD but  
192 to lack DNA repair/photolyase activity (Worthington *et al.*, 2003) which is in accordance with the position  
193 of this family in our functional tree. This finding highlights the potential of ProfileView to reveal novel  
194 functional classes within a protein family. (See also **Fig. S2**.)

195 **Comparison of the ProfileView tree with the FAD and CPF phylogenetic trees.** The comparison  
196 of ProfileView classification tree (**Fig. 2C**) with the CPF tree (**Fig. S3**) and the FAD tree (**Fig. S4**)  
197 highlights important differences in the topological organisation of major functional classes. A cartoon in  
198 **Figs 3ACD** compares the three trees for easy visualization. We notice that the CPF phylogenetic tree  
199 (**Fig. 3C**): 1. incorrectly groups sequences exhibiting disparate functions, for instance plant PR CRY and  
200 plant-like PR CRY are clustered within class III CPD PL; 2. hides the NCRY subtree within class I CPD  
201 PLs; 3. mixes light-dependent and light-independent proteins in a subtree where animal PR CRY and  
202 circadian transcriptional regulators are clustered within (6-4) PL sequences. Furthermore, the compatibility  
203 of domain architectures associated with different functional classes of CPF sequences (**Fig. 3B**) is coherent  
204 with the ProfileView tree topology (**Fig. 3A** bottom) and much less so with the CPF phylogenetic tree.  
205 Compare, for instance, the architectures for the classes plant-like PR CRY, plant PR CRY and NCRY, or  
206 those for classes I and III CPD PLs. All members of these classes have a PHR domain in which a specific CPF  
207 FAD binding domain is found, but C- and N-ter extensions of variable sequence or length. The architectures  
208 for plant-like PR CRY, plant PR CRY and NCRY possess N- or C-ter extensions whereas classes I and  
209 III CPD PLs only possess the PHR domain. Classes which are topologically close in the ProfileView tree  
210 preserve sequence/length characteristics of C- and N-ter regions and agree with what is expected in contrast  
211 to the subtrees of the CPF phylogenetic tree.

212 Similar observations can be highlighted by comparing the ProfileView tree with the FAD phylogenetic  
213 tree (**Fig. 3D**).

214 Summarizing, the reconstruction of ProfileView tree topology highlights three important results: 1. the

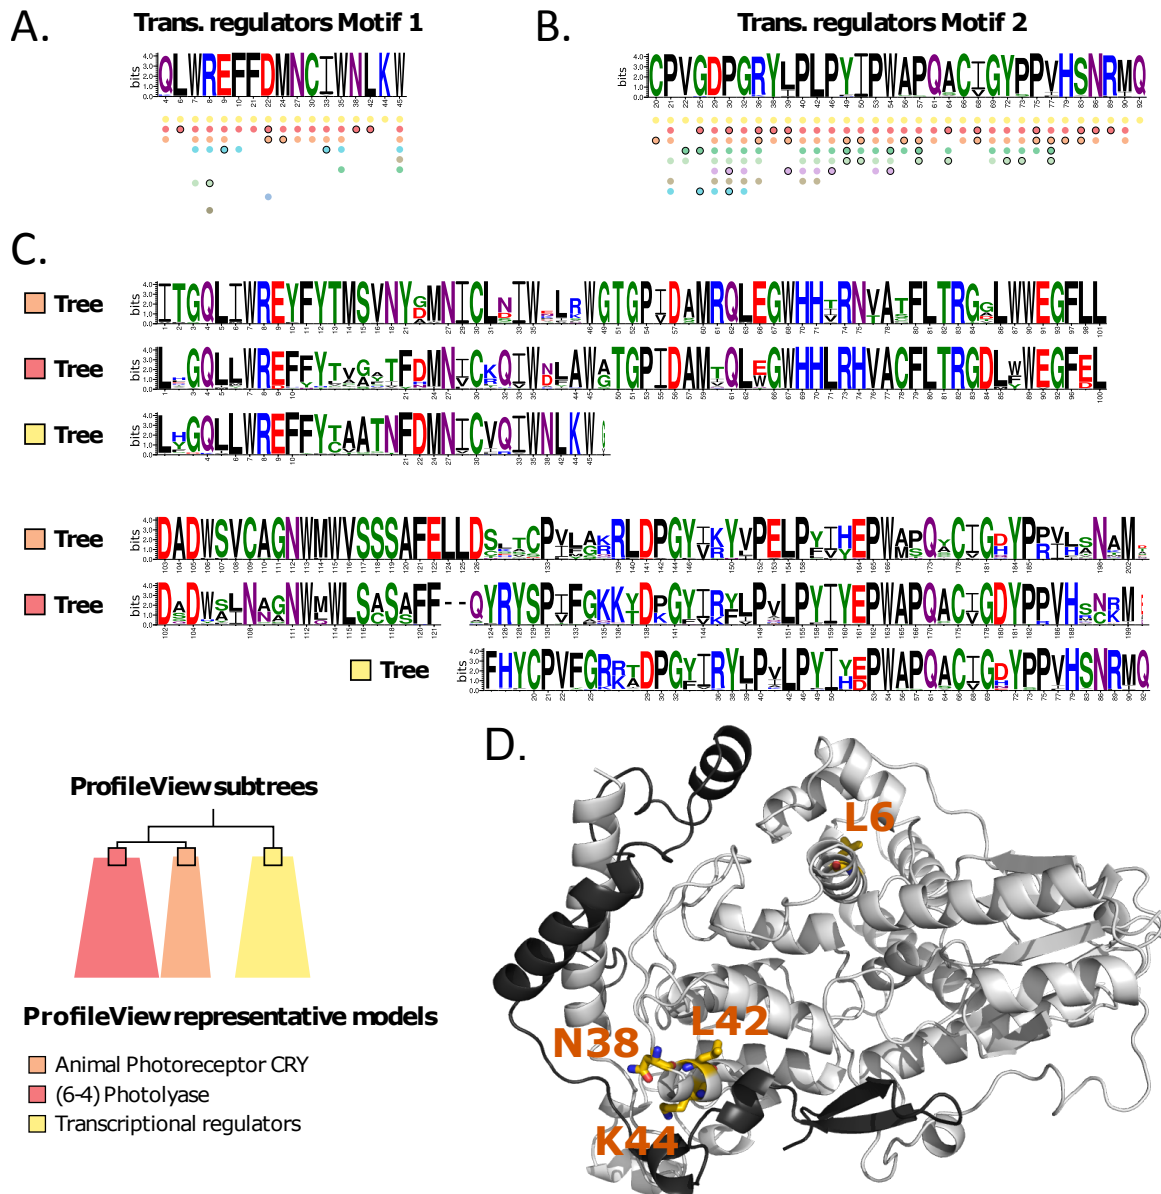

**Figure 4: Trans. regulators motifs and their comparison with (6-4) PL and animal PR CRY motifs.** **A, B:** two motifs of conserved residues present in light-independent transcriptional regulator sequences. They are extracted from two representative models of the sequences (described in **Fig. S7**) comprising the “yellow” subtree of **Fig. 3AE** (see also bottom). Numbers (under the letters) correspond to positions in a model, and they are not comparable between motifs. Coloured dots, piled below the motifs, indicate that the corresponding position is well-conserved (see Methods) for the subtrees with the same colour in **Fig. 3A**. Circled dots indicate positions that are less conserved (see Methods). For each motif, coloured dots are ordered, from top to bottom, depending on the best E-values given by **hhblits** to the pairwise alignments. **C.** Three representative motifs associated with the trans. regulators (yellow), (6-4) PL (red) and animal PR CRY (orange) subtrees of the ProfileView tree are aligned. Numbered positions correspond to conserved positions belonging to the associated representative motif. The absence of the number indicates less conserved positions. The alignment has been constructed using trans. regulators motifs as template models and all others as query models. The length of a motif depends on the length of the associated model, selected as best representing the sequences in a subtree. **D.** PDB structure (4CT0) of the interacting mouse cryptochrome mCRY1 (grey) and Period2 mPER2 (black) involved in the circadian clock. The four residues highlighted in the structure, N38, L42, K44 and L6, have been explained in the text.

215 resolution in two functional groups of light-independent proteins (transcriptional repressor CRY) and pro-  
216 teins which bind the FAD chromophore and need light for their function (PL and PR CRY; **Fig. 3E**); 2.  
217 the resolution of classes I and III CPD PL into two distinct sibling subtrees (**Fig. 3F**); 3. the prediction of  
218 possible novel functions, by the identification of novel groups as NCRY (**Fig. 3F**).

219 **Representative models, motifs and the validation of ProfileView on functionally characterized**  
220 **positions.** ProfileView associates representative models and functional motifs to the subtrees of its clas-  
221 sification tree. They are used to highlight subfamily delineations and molecular determinants underlying  
222 functions and interactions, respectively.

223 A representative model for a subtree of the ProfileView tree is a probabilistic model that, ideally, “sep-  
224 arates” the sequences in a subtree from all other sequences in the ProfileView tree (see step IX of the  
225 ProfileView pipeline in Methods). Representative models can be used to subdivide family or subfamily  
226 members into smaller groups, in order to capture differences in function-related features at a lower level, i.e.  
227 creating groups that preferably include only one function. We remark that all “functional” CPF subtrees  
228 corresponding to known subfamilies, highlighted by distinguished colors in **Fig.2C** and **Fig. S1**, are char-  
229 acterised by a representative model which separates at least 50% of the subtree sequences from all other  
230 sequences in the ProfileView tree. Moreover, we found representative models associated with several of the  
231 internal nodes of the ProfileView tree (**Fig. S1**, where the proportion of sequences supported by a model is  
232 indicated on the nodes), and many models separate subtree sequences sharply (100%) indicating functional  
233 diversity. An automatic procedure in ProfileView identifies representative models.

234 Given a representative model for a subtree, the set of conserved positions in the model univocally defines  
235 a motif for the corresponding subtree. Motifs associated with the 11 functional subtrees are reported in  
236 **Figs. S5, S6** with the exception of classes I and III CPD PL, known to share the same function, that we  
237 grouped together by considering the representative model of the minimal subtree including both classes.  
238 The only subtree where we found two distinct representative motifs, covering two different regions of the  
239 FAD binding domain sequence, is the light-independent transcriptional regulator tree (**Fig. 4AB**). When  
240 comparing with the other models, these two models are the only ones which do not cover the FAD binding  
241 domain region directly involved in proton or electron transfer to the FAD chromophore, as illustrated in  
242 **Fig. 4C** with the alignment of the two transcriptional regulator motifs, the (6-4) PL motif and the animal  
243 PR CRY motif. This alignment indirectly shows that proton/electron transfer is not involved in the function  
244 of light-independent transcriptional repressors (**Fig. 4C**) despite the importance of the FAD chromophore  
245 in their regulation (Hirano *et al.*, 2017).

246 To validate ProfileView motifs, we exploited the functional information derived by characterized mutations  
247 and looked whether their conserved amino acid positions would identify known functional natural variations,  
248 single amino acid residue replacements by site-directed mutagenesis or random mutagenesis, and structural

249 specificity when structures were available. For this, we manually curated a list of experimentally character-  
250 ized positions in CPF sequences (see **Supplemental File** “CPF\_mutants\_used\_for\_validation.xlsx”). Most  
251 of these positions display mutations causing loss of function or phenotypic changes. They are often involved  
252 in binding with other proteins, DNA substrates or with the cofactor FAD; active amino acids involved in  
253 catalytic or allosteric sites, such as DNA repair for PLs or post-translational modifications in CRY, are also  
254 identified. **Table S3** summarizes how many ProfileView positions are validated by current experimental  
255 evidence. Interestingly, it finds a number of highly specific positions for CPF functional classes that have  
256 not been reported in the literature before. We discussed these positions together with other observations in  
257 **Supplementary File**. They illustrate the great deal of functional information that can be extracted from  
258 representative motifs and be used to design tailored experiments for discovering new functional activities or  
259 novel biological mechanisms involving the FAD binding domain.

260 **How evolutionary close sequences are distinguished by motifs in ProfileView classification**  
261 **space?** ProfileView can distinguish very similar sequences associated to different functions. We illustrate  
262 this crucial feature with a concrete example, based on representation models and motifs. We consider the pair  
263 of sequences U5NDX3 and R7UL99, belonging to the CPF family. They are grouped together by phylogenetic  
264 analysis because very similar (sequence identity is 61.8% and sequence similarity is 74.7%) and are classified  
265 in different functional groups by ProfileView, as a photolyase and a transcriptional regulator respectively.  
266 The conserved positions belonging to the photolyase functional motif (motif called “(6-4) photolyase” in  
267 **Fig S5**) constructed from ProfileView analysis are shown in the alignment reported in **Fig. S8**. For almost  
268 all positions in the motif, the corresponding amino acid is conserved in both sequences (in green) as expected  
269 by the high sequence identity of the alignment. For positions 1, 33 and 135 in the motif, the amino acid is  
270 conserved only in the U5NDX3 sequence. This means that the photolyase representative model will provide  
271 higher matching values for U5NDX3 than for R7UL99. Moreover, two of these positions, 1 and 135, are  
272 highly conserved in the photolyase family and variable in the transcriptional regulator family (see dots below  
273 the motif in **Fig S5**) making the U5NDX3 sequence closer in classification space to the photolyase subgroup  
274 than R7UL99. Note that these observations concern the dimension of ProfileView classification space which  
275 is associated with the “(6-4) photolyase” model, but that is the contribution of all probabilistic models, one  
276 for each dimension of the classification space, that will define the position of the sequences bringing them  
277 closer either to the photolyase subgroup or the transcriptional regulator subgroup, in this specific example.

278 A second example is reported in **Fig. S9** for sequences Q6MDF3, D8UF46 and Q485Z2, where the  
279 phylogenetic tree could wrongly suggest an ancestral function, conserved in paraphyletic groups separated  
280 by clades where neofunctionalization would occur. The analysis of the sequence alignment (see legend in  
281 **Fig. S9**) highlights those positions explaining functional classification.

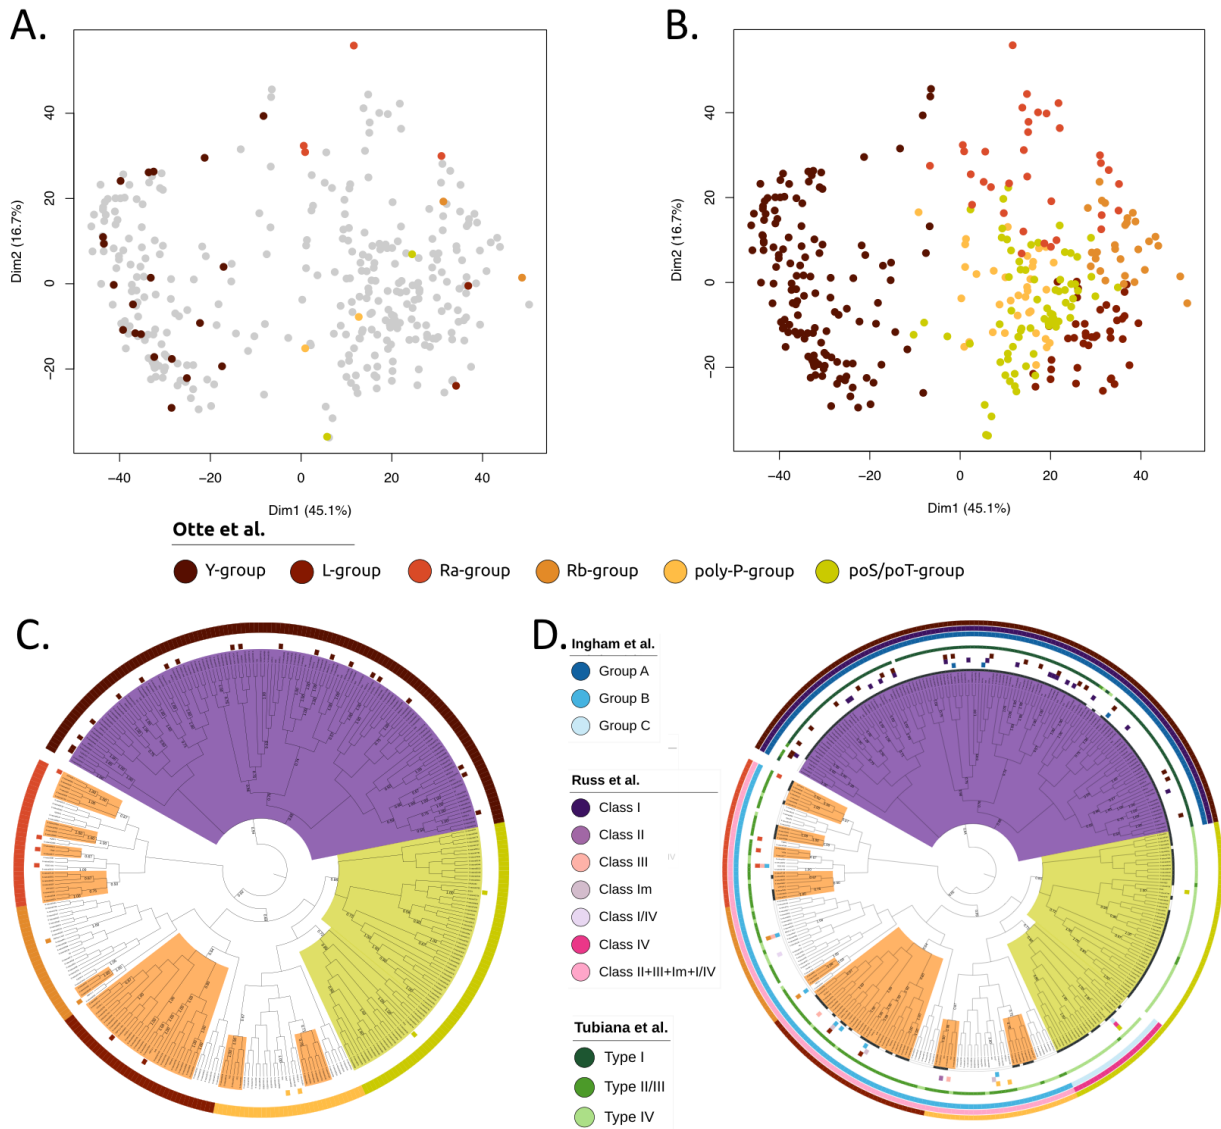

**Figure 5: ProfileView representation space and ProfileView tree for WW domains; compatibility with experimental and computational classification.** **A.** 2-dimensional projection of the ProfileView representation space for the WW domain natural sequences studied in (Otte *et al.*, 2003; Ingham *et al.*, 2005; Russ *et al.*, 2005; Tubiana *et al.*, 2019) obtained by PCA. The first and second PCA components explain 45.1% and 16.7% of the dispersion, respectively. Colors follow Otte’s functional classification of 32 WW sequences (Otte *et al.*, 2003); sequences not classified in (Otte *et al.*, 2003) are in light grey. **B.** As in A, where light grey sequences are classified by ProfileView in subsets associated with Otte’s functional classes (Otte *et al.*, 2003) by hierarchical clustering (see main text). **C.** The ProfileView tree represents the hierarchical clustering, realised on the high dimensional ProfileView space; see B. All subtrees with a representative model are indicated by a root labeled by the percentage of sequences in the subtree best matching the model (see Methods). Among these subtrees, those containing at least 3 sequences are coloured. 54 coloured squares are reported as functionally characterised, and 6 more were left unclassified in (Otte *et al.*, 2003; Ingham *et al.*, 2005; Russ *et al.*, 2005) (KIAA1052, PRP40-1, CA150-1, CA150-3, HYP109-2, IQGAP1). The 6 WW unclassified sequences are classified by us in different subtrees corresponding to different Otte’s groups: PRP40-1, CA150-1 in L-group; HYP109-2, IQGAP1 in Ra-group; CA150-3 in Rb-group; KIAA1052 in poS/poT-group. **D.** Same tree as in C, where sequences in a coloured subtree that are best matched by the representative model are highlighted in black in the first circular stripe surrounding the tree. As in C, the three experimental characterisations of natural sequences are reported in three layers made of small squares around the tree: “Otte” (Otte *et al.*, 2003) (brown scale; as in C), “Ingham” (Ingham *et al.*, 2005) (blue scale) and “Russ” (Russ *et al.*, 2005) (purple scale). “Tubiana” computational classification (Tubiana *et al.*, 2019) is reported in green scale; WW sequences not considered in Tubiana are left white. The three most external circular stripes show the compatibility between the grouping suggested by Otte, Russ and Ingham with ProfileView subtrees as described in **Table I**. The larger subtree comprising a given function, in the sense of either Otte, Russ and Ingham, gives the colour of the function to the corresponding portion of the stripe. Note that one of our trees is not functionally annotated by experimental data coming from Ingham nor Russ. (See **Fig. S11** and **Table I**.)

## 282 ProfileView on the WW domains

283 The WW domain family is found in many eukaryotes. WW domains are protein modules mediating protein-  
284 protein interactions through recognition of proline-rich peptide motifs and phosphorylated serine/threonine-  
285 proline sites. They are involved in a number of different cellular functions (Ingham *et al.*, 2005) such as  
286 transcription, RNA processing, receptor signalling and protein trafficking, and in several human diseases  
287 such as muscular dystrophy, cancer, hypertension, Alzheimer's, and Huntington's diseases. Their functional  
288 classification is far from being straightforward because based on the sequence motif and the binding affinity  
289 of the peptides targeted by WW domains. In particular, the same WW domain can bind with variable  
290 affinity to multiple peptides (Sudol and Hunter, 2000; Otte *et al.*, 2003; Russ *et al.*, 2005), and it is the  
291 modulation of binding properties that make hundreds of WW domains to interact specifically with hundreds  
292 of putative ligands in mammalian proteomes (Sudol and Hunter, 2000). WW domains have been experimen-  
293 tally classified in six interaction groups by Otte *et al* (Otte *et al.*, 2003) (Y, R<sub>a</sub>, R<sub>b</sub>, L, poly-P, poS/poT),  
294 in 3 groups by Ingham *et al* (Ingham *et al.*, 2005) (A, B and C) and in 6 groups by Russ *et al* (Russ *et al.*,  
295 2005) (I, Im, I/IV, II, III, IV). These three functional classifications were based on target peptide sequence  
296 motifs and their binding affinity. (**Fig. S10** shows the localisation of known classified sequences on the  
297 phylogenetic tree for WW domains.)

298 **Validation of ProfileView on the functional diversity of WW domains.** All natural sequences (60)  
299 analysed in (Otte *et al.*, 2003; Ingham *et al.*, 2005; Russ *et al.*, 2005) and upgraded with a set of 289 natural  
300 sequences randomly selected from (Tubiana *et al.*, 2019) and not yet experimentally characterized, have  
301 been considered for classification by ProfileView. Of the 60 experimentally tested natural sequences, 54 of  
302 them have been experimentally functionally characterized (**Table I**).

303 ProfileView tree is organised in seven subtrees as illustrated in **Fig. 5** and **Fig. S11**. The three indepen-  
304 dent experimental characterisations classify the 54 sequences in groups/classes that turn out to belong to  
305 specific ProfileView subtrees as shown in **Table S4**, and in **Fig. 5** and **Fig. S11** by the three first internal  
306 layers of colored squares (corresponding to the 54 characterised sequences). In other words, ProfileView  
307 perfectly classifies the 54 known functionally characterised sequences: the 35 sequences in Ingham's group  
308 A, Russ's class I and Otte's Y-group are grouped together in one large ProfileView subtree ( $T_1$  in **Table S4**  
309 and **Fig. S11**); the 2 sequences in Ingham's group C, Russ's class IV and Otte's posS/posT-group are  
310 grouped in two main ProfileView subtrees ( $T_6$ & $T_7$  in **Table S4** and **Fig. S11**); the remaining 17 sequences  
311 are organised in 4 other ProfileView subtrees corresponding to 4 different Otte's groups ( $T_2$  to the L-group,  
312  $T_3$  to the Ra-group,  $T_4$  to the Rb-group and  $T_5$  to the posS/posT-group; see **Table S4** and **Fig. S11**).

313 When comparing ProfileView classification to Russ' study, it is interesting to consider the nature of this  
314 latter. Indeed, Russ *et al* look at combinations of binding specificities of WW domain sequences to different  
315 peptides and classifies them in 6 classes accordingly. Sequences in classes Im, I/IV, II and III display



316 complex binding patterns involving different proline-rich peptide motifs whose differentiation is not obvious.  
317 Accordingly, these sequences belong to various ProfileView subtrees (*e.g.* class III sequences are spread on  
318 subtrees  $T_2$ - $T_5$ ), different from those involving class I and class IV. Therefore, in **Fig. 5** and **Fig. S11** (see  
319 pink color in the outer circle) and in **Table S4**, we grouped classes Im, I/IV, II and III together.

320 As shown in **Fig. 5**, not all the seven ProfileView subtrees are associated with a unique representative  
321 model (see legend). Multiple models might be associated to subtrees and describe different groups of  
322 sequences within the class, suggesting a finer functional organisation for this subfamily of WW domains. All  
323 identified representative models are reported in **Fig. S12** and their associated motifs in **Figs. S13, S14**.

### 324 ProfileView on the GH30 family of the CAZy database

325 The glycoside hydrosylases (EC 3.2.1.-), in short GH, are a widespread group of enzymes which hydrolyse  
326 the glycosidic bond between two or more carbohydrates or between a carbohydrate and a non-carbohydrate  
327 moiety. Their classification, based on substrate specificity and occasionally on molecular mechanisms, turned  
328 out to be particularly difficult. For this, a vast knowledge about these enzymes has been meticulously curated  
329 in the CAZy database (Lombard *et al.*, 2014). The GH30 is one of the GH families that has been organised  
330 in subfamilies in CAZy (<http://www.cazy.org/GH30.html>). It counts nine different subfamilies (GH30-1,...,  
331 GH30-9) corresponding to eleven different enzymatic chemical reactions. Some of these subfamilies are  
332 functionally classified by CAZy and some others are left unclassified.

333 **Validation of ProfileView on the functional diversity of GH30 sequences.** We considered the set  
334 of GH30 sequences and their classification in CAZy. ProfileView representation space and ProfileView tree  
335 for these sequences have been constructed using models coming from two similar PFAM domains, PF02055  
336 (Glyco\_hydro\_30) and PF14587 (Glyco\_hydr\_30\_2). The topology of the ProfileView tree (**Fig. S15** and  
337 **Fig. S23B**) perfectly separates sequences in the nine CAZy subfamilies GH30-1,..., GH30-9 into subtrees  
338 (only one GH30-3 sequence is placed within GH30-2 sequences). Furthermore, the subtrees well separate  
339 the EC numbers in CAZy functional annotation (see **Fig. S15**, **Table S5** and **Table S6**).

340 Four subfamilies (GH30-1, GH30-2, GH30-7 and GH30-9) are characterised by representative models  
341 directly explaining the separation of their sequences from all other GH30 sequences in the tree (**Fig. S23B**).  
342 In **Fig. S15**, the grey dots indicate the existence of representative models for many ProfileView subtrees,  
343 highlighting a possible functional sub-characterization for several CAZy subfamilies. For instance, note that  
344 the two CAZy reactions 3.2.1.45 and 3.2.1.21+3.2.1.37 for GH30-1 are identified in distinguished subtrees  
345 (green and violet labels are associated to reactions 3.2.1.45 and 3.2.1.21+3.2.1.37 in **Fig. S15**) separated  
346 by a representative model. Furthermore, for the GH30-3 subfamily, several sequences labelled by CAZy  
347 reaction 3.2.1.75 occur in different GH30-3 subtrees characterized by representative models, highlighting  
348 potential functional differences within this subfamily.

## 349 **ProfileView on the enzyme superfamilies of the Structure-Function Linkage Database**

350 The Structure-Function Linkage Database (SFLD) is a manually curated classification resource describing  
351 structure-function relationships for functionally diverse enzyme superfamilies (Schnoes *et al.*, 2009; Akiva  
352 *et al.*, 2014). Despite their different functions, members of these superfamilies “look alike” making them easy  
353 to misannotate. We challenge ProfileView against these sets of sequences and show that its classification  
354 meets the functional information in SFLD.

355 SFLD is organised in superfamilies whose members are subdivided into subgroups using sequence in-  
356 formation, and lastly into families, that is sets of enzymes known to catalyze the same reaction using the  
357 same mechanistic strategy. Subgroups are not organised by function, and the functional specificity of the  
358 sequences is detailed at the family level. We consider two different superfamilies, Haloacid Dehydrogenase  
359 and Radical SAM, because of their large variety of functions. Indeed, the Haloacid Dehydrogenase family is  
360 characterized by 25 subgroups organized in 22 families and 20 different reactions, and the Radical SAM fam-  
361 ily by 58 subgroups organised in 98 families and 85 reactions (see [sfld.rbvi.ucsf.edu/archive/django/  
362 superfamily/index.html](http://sfld.rbvi.ucsf.edu/archive/django/superfamily/index.html) for a detailed description). We analysed the HAD/ $\beta$ -PGM/Phosphatase-like sub-  
363 group of Haloacid Dehydrogenase and three subgroups of Radical SAM: B12-binding domain containing,  
364 Methylthiotransferase and SPASM/twitch domain containing. ProfileView functional classification has been  
365 validated on the SFLD families associated with the four subgroups.

366 **ProfileView on the HAD/ $\beta$ -PGM/Phosphatase-like subgroup.** Characterized functions included  
367 in this subgroup include 2-haloacid dehalogenase, beta-phosphoglucomutase, phosphonoacetaldehyde hy-  
368 drolase, and phosphatases of various specificities (see [sfld.rbvi.ucsf.edu/archive/django/subgroup/  
369 1129/index.html](http://sfld.rbvi.ucsf.edu/archive/django/subgroup/1129/index.html)). We run ProfileView on a model library constructed from the two similar Pfam domains  
370 HAD and HAD\_2 (see Table I). ProfileView groups all known sequences belonging to known characterized  
371 functions correctly, in separated subtrees, as illustrated in **Fig. S16** and **Table S7**. Moreover, for each sub-  
372 tree, it provides a model separating the set of sequences in the subtree from the rest of the set. The exception  
373 relies on one family, the 2-deoxyglucose-6-phosphatase which is grouped with the glycerol-3-phosphate phos-  
374 phatase, represented by only two sequences correctly grouped together, and for which a model separates  
375 both functions from the rest of the tree.

376 **ProfileView on the B12-binding domain containing subgroup.** All the enzymes in this subgroup  
377 appear to have a Vitamin B12 Binding domain and are involved in many different reactions (see [sfld.  
378 rbvi.ucsf.edu/archive/django/subgroup/1082/index.html](http://sfld.rbvi.ucsf.edu/archive/django/subgroup/1082/index.html)). We run ProfileView on a model library  
379 constructed from the two similar Pfam domains B12-binding and B12-binding\_2 (see **Table I**). **Fig. S17**  
380 and **Table S8** describe ProfileView classification in three large subtrees associated with three families, which  
381 are represented by tens of sequences. The remaining five families are underrepresented, four comprise exactly

382 one sequence and the fifth one only three sequences (grouped together by ProfileView, see “paromamine de-  
383 oxygenase” in **Fig. S17**). Underrepresented families are localised within two large subtrees of the ProfileView  
384 classification tree, the bacteriocin maturation and the hopanetetrol cyclitol ether synthase (see **Fig. S17**).  
385 Consistently, note that ProfileView does not propose a model separating these two large subtrees but it  
386 proposes one separating the anaerobic magnesium-ptotoporphyrin-IX monomethyl ester cyclase family from  
387 the rest.

388 **ProfileView on the Methylthiotransferase subgroup (MTTase).** All enzymes of this subgroup are  
389 organised around 4 families (see [sfld.rbvi.ucsf.edu/archive/django/subgroup/1061/index.html](http://sfld.rbvi.ucsf.edu/archive/django/subgroup/1061/index.html)) that  
390 have been defined in SFLD by considering the domain architecture of MTTase sequences comprising an N-  
391 terminal MTTase domain, a central radical generating fold domain and the C-terminal TRAM domain, not  
392 shared by other Radical SAM outside the MMTase. In contrast, to classify MTTase sequences, we used the  
393 Radical SAM domain only, shared by all subgroups of the superfamily. This domain allowed ProfileView to  
394 split the sequences in 4 main subtrees corresponding to the four known families as reported in **Fig. S18**  
395 and **Table S9**. A few sequences are misplaced compared to SFLD classification. ProfileView proposes  
396 many models splitting the four families. In particular, it proposes two representative models splitting the  
397 MiaB-like and CDK5RAP1 families from the rest and viceversa (**Fig. S18**).

398 **ProfileView on the SPASM/twitch domain containing subgroup.** We used ProfileView to study  
399 this subgroup (see [sfld.rbvi.ucsf.edu/archive/django/subgroup/1067/index.html](http://sfld.rbvi.ucsf.edu/archive/django/subgroup/1067/index.html)) through two in-  
400 dependent analysis, one based on the Radical SAM domain and other on the SPASM domain. This is  
401 an intrinsically difficult set, not only for functional annotation but also for domain annotation. Indeed,  
402 we identified the SPASM domain in 29 sequences based on the ProfileView model library of 4501 SPASM  
403 models, while only 6 of these sequences have been annotated by Pfam with a SPASM domain. ProfileView  
404 classification of the SPASM/twitch domain containing sequences based on SPASM domain organises the  
405 seven known SFLD functional families in distinct subtrees (see **Fig. S19** and **Table S10**). **Fig. S20** and  
406 **Table S11** describe ProfileView classification based on Radical SAM domain. Families are well organised  
407 in distinguished subtrees supported by representative models.

## 408 **Comparison of ProfileView with other computational approaches**

409 ProfileView is compared with the PANTHER classification system (Mi *et al.*, 2012, 2013), the state-of-the-  
410 art neural network approach based on Restricted Boltzman Machines (RBM) in (Tubiana *et al.*, 2019), and  
411 the CUPP platform (Barrett and Lange, 2019). In all comparisons it proves to overcome or be on par with  
412 the functional classification considered.

413 **ProfileView and PANTHER.** PANTHER (Mi *et al.*, 2012, 2013) is a large curated biological database

414 of gene/protein families and their functionally related subfamilies which has been designed to classify and  
415 identify the function of gene products. PANTHER provides data and tools to group sequences in functional  
416 clusters. Contrary to ProfileView, it does not organise them in a distance tree, missing the possibility to  
417 identify large-scale functional properties for groups of sequences clustering together, like the light depen-  
418 dent/independent CPF sequences. Comparison was realised on the full CPF family. For easier visualization,  
419 we reported PANTHER classification on both the ProfileView classification tree and the CPF distance tree in  
420 **Figs S21** and **S22**. ProfileView and PANTHER agree on several functional classes: “SLR1343 PROTEIN”  
421 for PANTHER and CRY Pro for ProfileView; “ZGC:66475” PANTHER and Class II CPD PL for ProfileView.  
422 Other PANTHER groups are function specific but they do not recognise the full functional subgroup, such as  
423 “CRYPTOCHROME 1A”, “CRYPTOCHROME 2B-APOPROTEIN” and “CRY2AProtein” for PANTHER  
424 that characterize a part of the Plant Photoreceptor CRY sequences. Finally, other PANTHER groups col-  
425 lect functions from different functional classes: “(6-4) PHOTOLYASE ISOFORM A” recognizes (6-4) PL,  
426 Class I CPD PL and NCRY; “CRYPTOCHROME-1” recognizes Plant PR CRY and circadian rhythms  
427 transcriptional regulators, which are light independent; “SI:CH1073-390K14.1” recognises both PR and PL.  
428 In particular, experimentally characterized CPF sequences show PANTHER limitations: many known (6-4)  
429 PL (red subtree) are annotated as circadian regulators, Class I CPD PL is partly classified as PR instead.  
430 Note also that no distinction between Class I, II, III CPD PL is evident in PANTHER classification, and  
431 that sequences in the NCRY subtree are annotated as (6-4) PL while they are PRs according to us and to  
432 (Emmerich *et al.*, 2020).

433 **ProfileView and the RBM approach.** The state-of-the-art neural network approach based on Restricted  
434 Boltzman Machines (RBM) in (Tubiana *et al.*, 2019) relies on the generative modelling of correlations in  
435 sequence alignments, it extracts biologically interpretable features but demands a particularly heavy training  
436 and computational time. The RBM approach classifies the dataset of 349 WW domain sequences in 3 groups  
437 (I, II/III, IV). Associated protein binding motifs have been proposed (Tubiana *et al.*, 2019).

438 The RBM approach correctly classifies 49 out of 52 functionally characterised sequences considered in  
439 (Tubiana *et al.*, 2019) as described in **Table S4**. It misclassified 3 sequences, compared to ProfileView correct  
440 classification of 54 out of 54 sequences. Note that the large group II/III, indistinguishable in Tubiana *et*  
441 *al.*, is organised into several ProfileView subtrees of sequences known to bind to specific peptides, as shown  
442 in (Otte *et al.*, 2003), providing a refined analysis of binding motifs. ProfileView tree also classifies, within  
443 its subtrees, many experimentally uncharacterized WW domain sequences, largely agreeing with Tubiana’s  
444 classification but not always, as seen in **Fig. 5** and **Fig. S11**.

445 In conclusion, compared to RBM (Tubiana *et al.*, 2019), ProfileView is more precise, it extracts from the  
446 analysis molecular determinants underlying protein functional diversity and it is much faster. Its computa-  
447 tion time is measured in hours versus days for RBM (see Methods and **Table S2**).

448 **ProfileView and CUPP.** CUPP (Barrett and Lange, 2019) is a computational approach designed to classify  
449 by using short peptide sequences expected to be specific for functional characterization of carbohydrate-active  
450 enzymes. In CUPP, proteins sharing the same peptide profile are claimed to share the same function.

451 The set of GH30 sequences used to validate ProfileView was also used for the evaluation of CUPP (Barrett  
452 and Lange, 2019). CUPP split these sequences in 33 groups and organised them in a dendrogram (Barrett  
453 and Lange, 2019) whose topology is reported in **Fig. S23A**. The dendrogram is composed of 9 subtrees  
454 corresponding to the 9 CAZy subfamilies. A schematic comparison of CUPP dendrogram (Barrett and  
455 Lange, 2019) and ProfileView tree is given in **Fig. S23**. Both their topologies highlight the separation of  
456 the CAZy subfamilies GH30-1, GH30-2, GH30-3 and GH30-9 from the other subfamilies. ProfileView tree  
457 separates further subfamilies GH30-4 and GH30-5 from the remaining ones.

458 A detailed analysis of the CAZy subfamilies indicates similar sequence organisation for the two methods.  
459 For instance, CUPP organises GH30-1 sequences by splitting them in five clusters (Barrett and Lange, 2019)  
460 that are easily identified in ProfileView tree, where three representative models are associated to three of  
461 CUPP clusters (purple, fuchsia and dark blue in third circle of annotation in **Fig. S15**). In contrast, the  
462 classification of CAZy subfamilies GH30-4 and GH30-5 (**Fig. S15**) highlights a large number of CUPP  
463 clusters while ProfileView groups GH30-5 into three main subtrees and GH30-4 into one. Two of the  
464 three ProfileView subtrees grouping GH30-5 are characterized by representative models. Interestingly, the  
465 remaining sequences are clustered by CUPP into several clusters and no representative model is found by  
466 ProfileView, indicating the difficulty of both methods to classify this group of sequences.

467 To test the general applicability of ProfileView versus CUPP, which was designed for enzyme proteins, we  
468 also compared the two approaches on the CPF sequences and on the WW domain sequences. This analysis  
469 highlights CUPP's limitations in handling arbitrary protein families.

470 On the WW domain sequences, CUPP does not provide any insightful classification, as **Fig. S27** shows.  
471 This is probably due to the very short length of this domain, between 35 and 40aa long.

472 On the CPF family, CUPP was run using both FAD and PHR sequences. CUPP tree and its associated  
473 clusters are represented in **Fig. S24** for FAD sequences (see also **Fig. S25**). CUPP: 1. groups all together  
474 the CPF classes “Transcriptional regulators”, (6-4) PL and Animal PR CRY. Hence, distinguished functions  
475 are shared in the same subtree. In particular, it does not distinguish light dependent from light independent  
476 protein sequences; 2. does not distinguish Class I and III CPD PL; 3. places the CRYPro subtree far from  
477 the remaining subtrees while, in ProfileView, CRYPro is located closer to Class II CPD PL; 4. splits the  
478 CRY DASH tree into two subtrees. There is no known functional annotation for one of the subtree and,  
479 therefore, it is not clear whether it is a relevant sequence split or not. ProfileView organises sequences in  
480 this subtree differently.

481 Furthermore, CUPP succeeds to classify a larger number of sequences (corresponding to the leaves left

482 uncoloured in **Fig. S24**) in the CPF family compared to ProfileView that did not find, among its models,  
483 sufficient confidence to include some input sequences in its tree. Viceversa, there are sequences that have  
484 been classified by ProfileView and that do not belong to CUPP classification (see uncolored sequences within  
485 CUPP clusters in **Fig. S24**). We also notice that, as ProfileView, CUPP: 1. groups Class II CPD PL in a  
486 single subtree, and 2. distinguishes NCRY sequences.

487 When CUPP considers the whole PHR sequence, the topology of the CUPP tree (**Fig. S26B**) gets closer  
488 to ProfileView topology even though CUPP keeps mixing Class I and III CPD PLs as well as light dependent  
489 (6-4) PL and Animal PR CRY sequences; the NCRY subtree locates close to photolyases (**Fig. S25**); the  
490 higher number of CUPP clusters fragments the functional organisation, as for instance for Class II CPD PL.

## 491 **Materials and Methods**

### 492 **Datasets used to validate the method**

493 The seven protein families used to evaluate ProfileView performance are listed in Table I (first and second  
494 column). Their sets of homologous sequences have been retrieved from publicly available databases (see  
495 below; see Table I, third column, for their number). All families present multiple functions. For each family,  
496 a subset of sequences has been functionally classified before (see Table I, fifth column) and it has been used  
497 for evaluation. Various protein sequence characteristics are reported in **Table I**, **Table S1** and **Table S2**.

498 CPF sequences were retrieved from UniProt, JGI projects ([genome.jgi.doe.gov](http://genome.jgi.doe.gov)), and OIST projects  
499 ([marinegenomics.oist.jp](http://marinegenomics.oist.jp)). The set was constructed following two main criteria: 1. it contains CPF  
500 sequences known to have a specific function according to experimental evidence reported in the literature  
501 (see **Supplemental File** for bibliographical references); 2. it contains CPF sequences that span the whole  
502 tree of life; they belong to 146 species, 74 classes, and 40 phyla (see **Supplemental File** for the detailed  
503 list). In the text, a “CPF sequence” refers to the full length CPF sequence comprising the PHR domain,  
504 including the FAD binding domain, and possibly the C- and N-terminal extensions, while a “FAD sequence”  
505 refers to the FAD binding domain sequence exclusively.

506 The set of WW domain sequences was constructed by combining the datasets of natural sequences  
507 analysed in (Otte *et al.*, 2003; Ingham *et al.*, 2005; Russ *et al.*, 2005; Tubiana *et al.*, 2019). 60 sequences  
508 have been experimentally characterized (Otte *et al.*, 2003; Ingham *et al.*, 2005; Russ *et al.*, 2005) and the  
509 remaining ones have been randomly selected, in comparable proportion, from the three sets classified in  
510 Tubiana *et al* (types I, II/III, IV) (Tubiana *et al.*, 2019).

511 The set of GH30 sequences is the same used in (Barrett and Lange, 2019) (file GH30.faa provided  
512 with the CUPP program v1.0.14 and containing 1803 sequences) and described in the Carbohydrate-Active  
513 Enzymes database CAZy (<http://www.cazy.org/GH30.html>). It is organised in different subfamilies of the

514 CAZy classification. Some of these subfamilies are functionally classified by CAZy and some others are left  
515 unclassified. We used the annotation files in (Barrett and Lange, 2019), where 721 of the 1803 sequences  
516 have a mapping/label to the subfamilies from GH30-1 to GH30-9. Note that, of the 1675 sequences retained  
517 for analysis by ProfileView after filtering, 695 have a label in the GH30 ProfileView tree (**Table I**).

518 The set of sequences of the HAD/ $\beta$ -PGM/Phosphatase-like subgroup of the Haloacid Dehalogenase  
519 (HAD) superfamily and of the three subgroups of the Radical-SAM superfamily (B12-binding domain  
520 containing, Methylthiotransferase and SPASM/twitch domain containing) have been retrieved from the  
521 Structure-Function Linkage Database (SFLD) (Schnoes *et al.*, 2009; Akiva *et al.*, 2014). Namely, each sub-  
522 group is defined by the union of the sets of annotated sequences associated with its families in SFLD. Given  
523 a subgroup, we considered all its families, even if they were represented by very few sequences, possibly only  
524 one.

## 525 Clade-Centered Models and a multi-source functional annotation

526 Widely used search methods (Altschul *et al.*, 1997; Eddy, 2011; Remmert *et al.*, 2011) are based on a mono-  
527 source annotation strategy, where a single probabilistic model (*e.g.*, a pHMM (Eddy, 1998)), generated from  
528 the consensus of a set of homologous sequences, is used to represent a protein domain. The mono-source  
529 strategy usually performs well for rather conserved homologous sequences, but when sequences have highly  
530 diverged, consensus signals become too weak to generate a useful probabilistic representation and global-  
531 consensus models do not characterize domain features properly. A *multi-source* domain annotation strategy  
532 (Bernardes *et al.*, 2016), in which protein domains are represented by several probabilistic models, called  
533 *Clade-Centered Models* (CCM), was implemented in CLADE (Bernardes *et al.*, 2016) and MetaCLADE  
534 (Ugarte *et al.*, 2018) for genomes and metagenomes/metatranscriptomes respectively.

535 To construct CCMs (see below), we consider the *full* set of sequences  $S^i$  associated with a Pfam domain  
536  $D^i$  (Finn *et al.*, 2014) and, for each sequence  $s_j \in S^i$ , we construct a *clade-centered* profile HMM (CCM)  
537 by retrieving a set of homologous sequences close to  $s_j$  from UniProt. Such a model displays features  
538 characteristic of  $s_j$  and that might differ from other domain sequences  $s_k \in S^i$ . The rationale is that the  
539 more  $s_j$  and  $s_k$  are divergent, the more clade-centered models are expected to highlight different features.  
540 It has been shown that CCMs significantly improve domain annotation (both for full genomes (Bernardes  
541 *et al.*, 2016) and for metagenomic/metatranscriptomic sequences (Ugarte *et al.*, 2018)) and, due to their  
542 closeness to actual protein sequences, they are more specific and functionally predictive than the canonical  
543 global-consensus approach. In this work, however, we build and use CCMs differently aiming at better  
544 resolve the functional organisation of sequences within protein families, whose sequences likely share the  
545 same domain architecture. In order to capture conserved motifs likely to be of functional relevance, we  
546 built highly specific clade-centered models. They will likely belong to protein interaction sites, be made of

547 conserved positions on subsets of homologs, and be determinants of functional specificity.

## 548 **The ProfileView method**

549 A flowchart describing ProfileView pipeline is provided in **Fig. 6** and its ten main steps are explained in  
550 detail below. A hands-on description of the ten steps for the CPF family is given in the **Supplementary**  
551 **File**. ProfileView takes as input a Pfam domain  $D$  and a set of homologous sequences  $\mathcal{S}$  to be classified. If  
552 similar Pfam domains exist (Pfam usually names them with a numerical extension, as for instance HAD and  
553 HAD\_2), then the user can decide to provide several alternative domains as input and construct the model  
554 library  $\mathcal{M}_D$  accordingly.

555 **I. Model library construction.** To construct a library of models  $\mathcal{M}_D$  for the domain  $D$ , we considered  
556 sequences from the FULL dataset in Pfam database (Finn *et al.*, 2014) and, for each sequence, we built a  
557 CCM (Bernardes *et al.*, 2016) by searching in Uniclust30 (which is UniProtKB clustered at 30% identity and  
558 for which a HH-blits database is provided; Mirdita *et al.* (2017)) for highly significant matches of homologous  
559 sequences having at least 60% identity with the query domain sequence and covering at least 70% of it. More  
560 precisely, a multiple sequence alignment is built using the command `hhblits` of the HH-suite (Remmert  
561 *et al.*, 2011) (with parameters `-qid 60 -cov 70 -id 98 -e 1e-10` and database `uniclust30_2017_10`)  
562 and subsequently converted into a pHMM with HMMER (Eddy, 1998) in order to perform a sequence-  
563 profile comparison. Moreover, a pHMM is considered only if it is trained with a minimum number of 20  
564 sequences.

565 Note that the sets of Pfam sequences in the FULL dataset might be very large (some tens of thousands  
566 of sequences) and that we reduced their number to a few thousand sequences, by applying MMseq2 (at  
567 <https://github.com/soedinglab/MMseq2>; the `easy-cluster` command of `mmseqs` was used with param-  
568 eter `--min-seq-id`, to set the minimum sequence identity for clustering, and parameter `-c 0.8`, to consider  
569 matches above this fraction of aligned/covered query/target residues) off the ProfileView pipeline, to cluster  
570 close sequences together and select, from each cluster, a representative sequence from which to generate a  
571 model, as above. We asked sequences in a cluster to have more than either 40 or 60% sequence identity  
572 (default set at 50%) depending on the protein family, in such a way that around 3000-4000 representative  
573 sequences could be identified for building the model library.

574 If several similar Pfam domains are considered, the procedure above will be applied to the Pfam sequences  
575 associated with all domains.

576 **II. Sequence filtering.** After building the set of models for  $D$ , we discarded from the input set of  
577 sequences  $\mathcal{S}$ , all sequences against which no domain hit was found (independently of the hit score).  $\mathcal{S}$   
578 domain annotation is carried out by considering HMMER best hits (version 3.1b2) for models in  $\mathcal{M}_D$ . Note



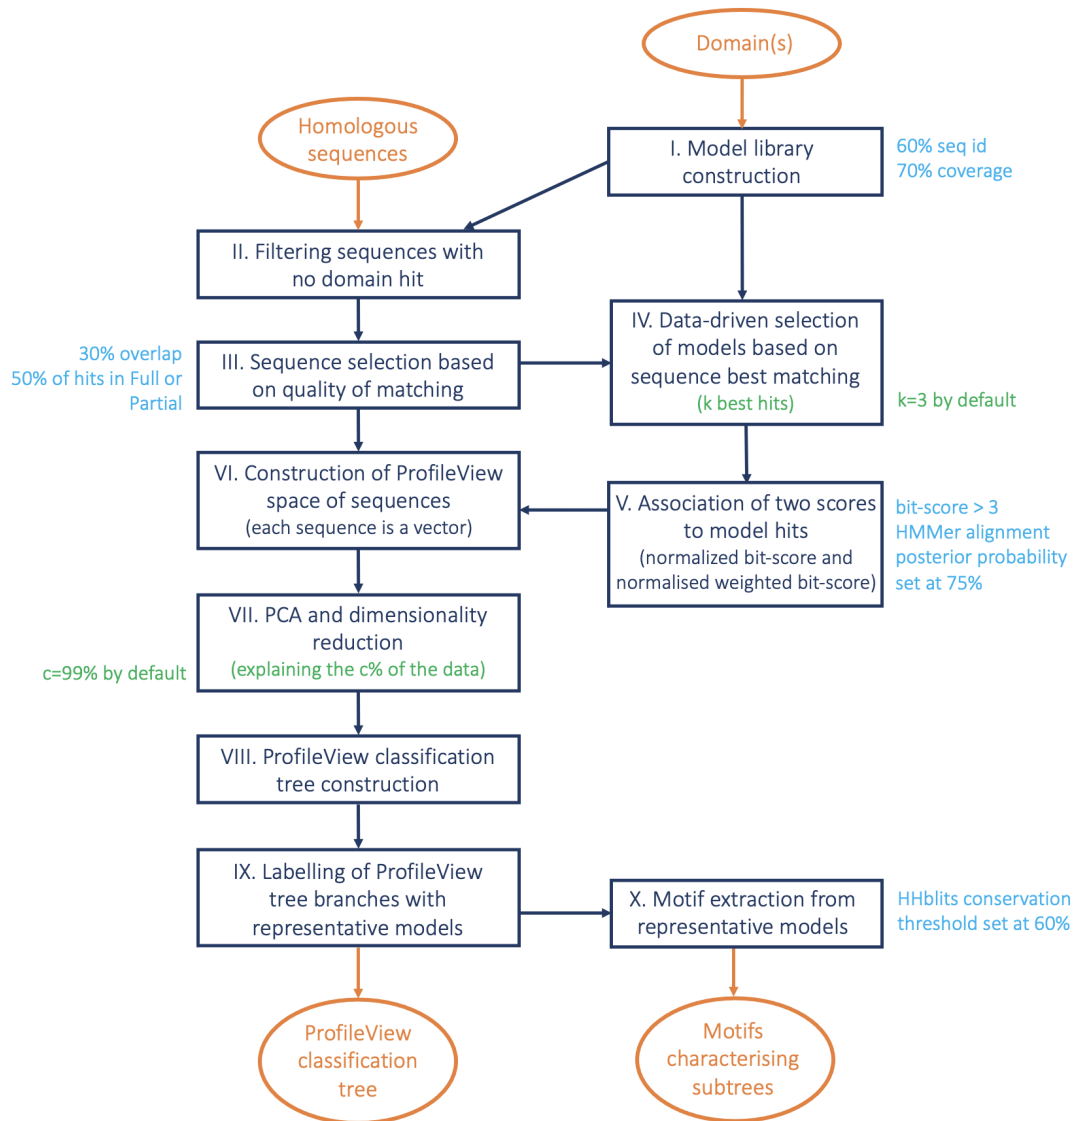

**Figure 6: ProfileView flowchart.** The ProfileView pipeline is organised in ten main steps: (I) building the model library for a domain or a few similar domains chosen by the user, (II) sequence filtering based on matching/unmatching of the models on a sequence, (III) sequence selection based on the quality of a match, (IV) filtering of models to reduce model redundancy, (V) association of two scores to each model hit, (VI) construction of the ProfileView space of sequences, (VII) dimensionality reduction of the sequence space, (VIII) construction of the ProfileView classification tree, (IX) identification of the best representative models for subtrees, (X) extraction of functional motifs from representative models. ProfileView parameters that the user can modify are highlighted in green, and those that remain fixed are highlighted in cyan.

579 that this step, based on multiple probabilistic models, is able to identify domains in divergent sequences  
580 where the consensus Pfam model cannot provide a hit. For all protein families, Table I (fourth column)  
581 reports the number of sequences after filtering. (See **Fig. S28A** for an illustration of sequence filtering.)

582 **III. Sequence selection.** Each CCM in  $\mathcal{M}_D$  is mapped against the set  $\mathcal{S}$  of all input sequences using  
583 HMMER. Let  $\mathcal{H} = \{h_{s,m} \mid s \in \mathcal{S}, m \in \mathcal{M}_D, \text{score}(h_{s,m}) > 0\}$  be the set of hits  $h_{s,m}$  provided by `hmmsearch`,  
584 where  $s$  is a sequence of  $\mathcal{S}$ ,  $m$  is a model of  $\mathcal{M}_D$  and  $\text{score}(h_{s,m})$  is the bit-score assigned to  $h_{s,m}$ . The  
585 bit-score is a log-odds ratio score (in base two) comparing the likelihood of the pHMM to the likelihood of  
586 a null hypothesis (*i.e.* an i.i.d. random sequence model). More formally,

$$\text{score}(h_{s,m}) = \log_2 \frac{\Pr(s \mid m)}{\Pr(s \mid \text{null})}$$

587 where  $\Pr(s \mid m)$  is the probability of the pHMM  $m$  generating the sequence  $s$  and  $\Pr(s \mid \text{null})$  is the  
588 probability of  $s$  being generated by the null model (Barrett *et al.*, 1997).

589 We partitioned the hit set  $\mathcal{H}$  in three subsets  $Full(\mathcal{H})$ ,  $Overlap(\mathcal{H})$ ,  $Partial(\mathcal{H})$ , where  $Full(\mathcal{H})$  contains  
590 all hits that fully cover the associated model,  $Overlap(\mathcal{H})$  contains all hits involving the extremes of a  
591 sequence covered only partially by the associated model (this situation corresponds to an “incomplete”  
592 sequence), and  $Partial(\mathcal{H})$  contains all remaining hits. (See **Fig. S28B** for an illustration of the three  
593 matching types.) More formally, given a hit  $h_{s,m} \in \mathcal{H}$ , it belongs to  $Full(\mathcal{H})$  if the aligned region of  $m$   
594 to  $s$  (excluding gaps) is at least 90% of the length of  $m$ . If  $h_{s,m}$  represents an overlap between  $s$  and  $m$   
595 (allowing an overhang length of at most the 10% of the sequence length) then  $h_{s,m} \in Overlap(\mathcal{H})$ . Otherwise,  
596  $h_{s,m} \in Partial(\mathcal{H})$ .

597 To eliminate potentially incomplete sequences, a sequence  $s$  is retained only if:

- 598 1. either at most the 30% of its hits belong to  $Overlap(\mathcal{H})$ ,
- 599 2. or, at least the 50% of its hits belong to either  $Full(\mathcal{H})$  or  $Partial(\mathcal{H})$ .

600 These two conditions have been introduced in order to take into account the fact that Pfam might also  
601 contain partial sequences that could lead to the construction of very short models (that could be fully  
602 aligned in potentially incomplete sequences). We refer to the reduced set of sequences as  $\mathcal{S}^*$ .

603 **IV. Data driven selection of models based on sequence best matching.** In order to restrict the  
604 analysis to a reduced set of models that remains representative of  $\mathcal{M}_D$ , we kept only those models that  
605 achieve one of the  $k$  best scores for at least one sequence of  $\mathcal{S}^*$ , for  $k = 3$  (default). The rationale of this  
606 model filtering is to get rid of “noisy” models and, at the same time, significantly reduce the size of  $\mathcal{M}_D$ , from  
607 some thousands down to a few hundreds. We refer to the reduced set of models as  $\mathcal{M}_D^*$ .  $k$  is a parameter  
608 that can be set by the user.

609 **V. Association of two ProfileView scores to model hits: the normalized bit-score and the**  
610 **normalized weighted bit-score.** Let  $L_s$  be the number of positions in a sequence  $s$  that match to a  
611 model  $m$  in a sequence/model alignment (that is, no gap is considered in the counting). Given a hit  $h_{s,m}$   
612 we define the following two scores for it:

- 613 • a normalized bit-score  $ns(h_{s,m}) = \frac{score(h_{s,m})}{L_s}$ ;
- 614 • a normalized weighted bit-score  $nws(h_{s,m}) = \frac{Wscore(h_{s,m})}{L_s}$ , where  $Wscore(h_{s,m})$  is the sum of bit-scores  
615 over the positions in the sequence-profile alignment where the bit-score is greater than 3 (that is, the  
616 positions where  $m$  and  $s$  strongly agree). More formally, let  $\sigma(s_i, m_j) = \log_2 \frac{e(s_i, m_j)}{bg(s_i)}$  be the log-odds  
617 ratio of a residue  $s_i$  being emitted from a match state  $m_j$  with emission probability  $e(s_i, m_j)$  and with  
618 null model background frequency  $bg(s_i)$ , defined by HMMER during the model construction and differ-  
619 ing between amino acids (Eddy, 1998). Given the list  $\langle (s_{i_1}, m_{j_1}), \dots, (s_{i_K}, m_{j_K}) \rangle$  of the aligned residues  
620 of  $s$  against the model states of  $m$  and such that the posterior probability, computed by HMMER, of  
621 each aligned pair is greater than 75%, we define  $Wscore(h_{s,m}) = \sum_{z=1}^K \sigma(s_{i_z}, m_{j_z})$ .

622 Both scores are computed for all hits  $h_{s,m}$  and used to construct the ProfileView space of sequences.

623 **VI. The construction of a ProfileView space of sequences.** For each sequence  $s \in \mathcal{S}^*$ , we construct  
624 a vector  $v_s$ , where the dimension of  $v_s$  is  $2|\mathcal{M}_D^*|$  and  $|\mathcal{M}_D^*|$  is the number of models in  $\mathcal{M}_D^*$ . The vector  $v_s$   
625 contains the pairs of values  $ns(h_{s,m})$  and  $nws(h_{s,m})$ , for each  $m \in \mathcal{M}_D^*$ . If a model  $m$  does not have a hit  
626 on the sequence  $s \in \mathcal{S}^*$ , then we assume that  $h_{s,m} \notin \mathcal{H}$  and let  $ns(h_{s,m}) = 0$  and  $nws(h_{s,m}) = 0$ . Hence,  
627 we say that the ProfileView space  $\mathcal{PV}$  is a  $2|\mathcal{M}_D^*|$ -dimensional space, where each dimension is associated  
628 with either the normalized bit-score or the normalized weighted bit-score for some model  $m \in \mathcal{M}_D^*$ . Each  
629 sequence is a point in  $\mathcal{PV}$  and its position reflects the proximity of the sequence to CCMs in  $\mathcal{M}_D^*$ .

630 **VII. PCA and dimensionality reduction for ProfileView space of sequences.** After constructing  
631 the ProfileView space  $\mathcal{PV}$  for the sequences  $s \in \mathcal{S}^*$ , Principal Component Analysis (PCA) is performed to  
632 reduce its number of dimensions. More precisely,  $\mathcal{PV}$  is reduced to a  $p$ -dimensional space  $\mathcal{PV}^*$ , where  $p$  is  
633 the minimum number of principal components that explain the  $c\%$  of variance for the set  $\mathcal{S}^*$ . By default,  
634  $c = 99\%$ . This value should decrease the number of dimensions to a few dozens. If a protein family is  
635 characterised by a large diversity of representative sequences, the user may have to loosen the constraints  
636 on variance by setting  $c$  to smaller values.  $c$  is a parameter that can be set by the user.

637 **VIII. The ProfileView tree construction.** Sequences are clustered in  $\mathcal{PV}^*$  using a hierarchical agglomer-  
638 ative strategy. Namely, we considered the Euclidean distance between vectors and Ward's minimum variance  
639 method for merging clusters. The logic of this criterion is to select, at each step, the pair of clusters that  
640 minimize the total variance within the cluster after the merging. Starting from all clusters being singletons,

641 this bottom-up algorithm completes in  $|\mathcal{S}^*| - 1$  agglomerative steps and allows to represent clusters in a  
642 hierarchical way and to define a rooted tree. More precisely, it produces a binary tree where each internal  
643 node defines a cluster of two or more elements (according to the chosen merge criterion). Moreover, in such  
644 a tree, the distances/dissimilarities between the merged clusters are encoded as edge weights.

645 **IX. Association of representative models to ProfileView subtrees.** To better explore subtrees in the  
646 ProfileView tree, potentially associated with known functions, we associated a *representative model* to the  
647 sets of sequences that label their leaves. Intuitively, a representative model separates a subset of sequences  $\mathcal{C}$   
648 from the rest of the sequences of the tree (this set is designated  $\mathcal{S}^* \setminus \mathcal{C}$ ) in the ProfileView space  $\mathcal{PV}^*$ . Given  
649 a model  $m$  in the library, let us call  $\mathcal{C}_m^*$  the maximal subset of  $\mathcal{C}$  where the model assigns higher scores to  
650 sequences in  $\mathcal{C}_m^*$  than to sequences in  $\mathcal{S}^* \setminus \mathcal{C}$ . This must apply to at least one of the metrics –  $ns$  and  $nws$   
651 – which define  $\mathcal{PV}^*$  (see step III). For each model  $m$  in the library, we compute  $\mathcal{C}_m^*$  and choose the model  
652 with a  $\mathcal{C}_m^*$  of largest cardinality as the *representative model* of  $\mathcal{C}$ . If two models have the same maximum  
653 cardinality, we choose the model  $m$  that provides the best separation, i.e. the model that maximizes the  
654 distance between the centroids of the sets  $\mathcal{C}_m^*$  and  $\mathcal{S}^* \setminus \mathcal{C}$  (again, computed according to the  $ns$  and  $nws$   
655 metrics). If  $\mathcal{C}$  is the set of sequences of a subtree  $T$  of the ProfileView tree (which is not the entire tree), then  
656 a *representative model*  $m$  for  $\mathcal{C}$  is associated with the root of  $T$  when the following two conditions are met:  
657 1.  $\mathcal{C}_m^*$  includes at least half of the sequences in  $\mathcal{C}$  and 2.  $\mathcal{C}_m^*$  contains at least one sequence from each of the  
658 child subtrees of  $T$ . Note that a node in the ProfileView tree might be left without a representative model.  
659 When ProfileView returns a representative model for a node of the tree, it also returns a list of suboptimal  
660 models covering either the same amount of sequences  $|\mathcal{C}_M^*|$  or 90% of  $|\mathcal{C}|$ .

661 **X. Motifs extraction from representative models.** A motif extracted from a representative model is  
662 the set of all amino acids characterizing well-conserved columns (*i.e.* match states) in the sequence alignment  
663 associated with the model, according to the `hhblits`' definition. That is, given a column of the multiple  
664 sequence alignment related to the model, an amino acid is *well-conserved* if it occurs with a probability  
665  $\geq 0.6$  before adding pseudo-counts and including gaps in the fraction count.

## 666 Parameters used in ProfileView analysis of the seven protein families

667 For all protein families, the domain(s) considered for model construction, their accession code and the number  
668 of constructed models are reported in **Table I**. For the model construction, representative sequences for  
669 FAD and GH30 were retrieved from Pfam v31 while for all other domains, we used Pfam v32. For the three  
670 families, Glycoside Hydrolase family 30 (GH30), HAD/ $\beta$ -PGM/Phosphatase-like and B12-binding domain  
671 containing, Pfam contains two similar domains (see Table I, sixth column) and we used Pfam sequences from  
672 both of these domains, we clustered them and built the associated models. For the three families, using two  
673 domains instead of one improves the classification slightly.

674 ProfileView was run with the same default parameters  $k = 3$  and  $c = 99\%$ , for all protein families in  
675 Table I, with the exception of the WW domain, which is characterised by a wide variability of sequences,  
676 that run with  $k = 5$  and  $c = 80\%$  (see steps IV and VII). For WW domains, note that with  $c = 80\%$ , we have  
677 obtained a space of 11 dimensions, against 206 dimensions obtained with a threshold of  $c = 99\%$ , starting  
678 from a total of 2488 dimensions. Also, the number of best matching models increased to  $k = 5$  allowed us to  
679 obtain 1244 models versus 845 obtained with  $k=3$ . The idea being that when the dataset of sequences to be  
680 classified is very diversified, as for the WW domain family, the number of models should be large ( $> 1000$ )  
681 to explain diversity.

682 For the SPASM/twitch domain containing family subgroup, we performed two independent analyses, one  
683 based on the Radical-SAM domain and the other based on the SPASM domain. This is because all the  
684 original sequences contained the Radical-SAM domain but not all contained the SPASM domain.

## 685 Motifs graphical representation

686 Model logos were built using the python package of Weblogo (Crooks *et al.*, 2004) (version 3.7) which allowed  
687 us to easily export sequence logos (Schneider and Stephens, 1990). Amino acids are colored according to  
688 chemical properties: neutral polar amino acids (G, S, T, Y, C) show in green, acidic polar (Q, N) violet,  
689 positively charged (K, R, H) blue, negatively charged (D, E) red, and hydrophobic (A, V, L, I, P, W, F, M)  
690 black.

691 The graphical representation of a motif associated with some representative model was augmented by  
692 extra information helping to easily compare the motif across representative models. Namely, we highlighted,  
693 by a coloured “dot”, positions in it found to be well-conserved in other representative models. Given a  
694 reference model  $M_r$  and a query model  $M_q$ , a dot is put under a well-conserved column of  $M_r$ , if there exists  
695 a column in the query model  $M_q$ : 1. aligning in `hhblits` with a score greater than +1.5 (*i.e.* fairly similar  
696 amino acid profiles) and posterior probability greater than 0.8; 2. containing a most conserved amino acid  
697 which is the same as in  $M_r$  and is also well-conserved. A circled dot indicates an aligned column in  $M_q$   
698 satisfying 1 but not 2. This means that the most conserved amino acid in  $M_r$  shows  $< 60\%$  frequency in  
699  $M_q$ . Note that, in this case,  $M_r$  and  $M_q$  might display different most conserved amino acids.

700 It is important to notice that given two models and a position, the score assigned to that position in  
701 the `hhblits` pairwise alignment of the models depends on the reliability of the query-template alignment  
702 (<https://github.com/soedinglab/hh-suite/wiki>). Depending on which one of the models is considered  
703 as a template, the scores assigned to the same position might vary (the confidence values are obtained  
704 from the posterior probabilities calculated in the Forward-Backward algorithm of `hhblits`). In particular,  
705 `hhblits` is warning that the confidence score for an aligned position depends on the confidence on the  
706 alignment of the close by region. As a consequence, the alignment score of certain conserved position might

707 decrease because of the presence of a very variable region in their vicinity, possibly containing gaps. This  
708 explains why, for aligned positions of two motifs, we might miss to indicate related positions or we might  
709 display different color dots. An example of missing related positions is illustrated by position 102 in the  
710 NCRY motif and position 103 in the plant PR CRY motif of CPF. The two motifs clearly diverge within  
711 the region just following positions 102/103, justifying a difficult model alignment and a low confidence score  
712 for 102/103. A second example, illustrating the asymmetry of the coloured dots, is position 102 in the  
713 NCRY motif aligned with position 95 in CRY Pro. While the CRY Pro motif records the coloured dot for a  
714 matching with NCRY, this is not true for the NCRY motif. Indeed, while the two positions align together  
715 with a confidence score of 0.8 for the CRY Pro model taken as a template, they also align together when  
716 the NCRY model is taken as the template but with a confidence score dropping at 0.6.

### 717 **Phylogenetic tree construction for CPF, FAD and WW sequences**

718 The multiple sequence alignments of CPF sequences and FAD sequences were computed using MUSCLE  
719 version v3.8.31 (Edgar, 2004), and were then trimmed using trimAl version 1.4.rev22 (Capella-Gutiérrez  
720 *et al.*, 2009) with a gap cutoff of 0.01 (*i.e.* columns containing more than 99% of gaps were removed). Then,  
721 for each sequence alignment, we selected the best evolutionary model using ProtTest (version 3.4.2) (Darriba  
722 *et al.*, 2011). More precisely, the evolutionary model best fitting the data was determined by comparing the  
723 likelihood of all models according to the Akaike Information Criterion (AIC). The model optimisation of  
724 ProtTest was run using a maximum-likelihood-tree strategy and the tree generated for the best-fit model  
725 (VT+G+F) was considered as input for the construction of the final phylogenetic tree (with parameter  $\alpha =$   
726 1.061). In particular, the construction of a maximum-likelihood phylogenetic tree has been carried out  
727 with PhyML 3.0 (Guindon *et al.*, 2010) that optimized the output tree with Subtree-Prune-Regraft (SPR)  
728 moves and considering the SH-like approximate likelihood-ratio test. Finally, branches with a support value  
729 smaller than 0.5 were collapsed. The phylogenetic tree for the set of homologous CPF sequences used to  
730 validate ProfileView is reported in **Fig. S3** and contains 307 leaves corresponding to the 307 CPF sequences  
731 containing the FAD binding domain. The phylogenetic tree for the set of 307 FAD sequences is reported in  
732 **Fig. S4**.

733 The procedure used to generate the phylogenetic tree for WW domain sequences is the same as the one  
734 used for CPF and FAD sequences. The best-fit model (computed with ProtTest) is RtREV+I+G, with  
735 parameters  $\alpha = 1.647$  and  $p - inv = 0.028$ .

736 Phylogenetic and ProfileView trees have been generated with iTOL (Letunic and Bork, 2019).

## 737 Output files of ProfileView

738 ProfileView produces several output datasets: the model library, the ProfileView tree, the list of representa-  
739 tive models associated with internal nodes of the tree.

740 Also, ProfileView provides to the user the possibility to choose a list of representative models to be  
741 compared. The first model of this list is considered as a reference model. A first output describes and  
742 provides the logo reporting all conserved positions together with a list of coloured dots (possibly circled)  
743 obtained after a pairwise comparison of a model in the list with the reference model (see Methods above;  
744 see for example **Fig. 1D**). A second output describes and provides the logo reporting an intermediate  
745 representation of the positions in the reference model, namely reporting all conserved positions in the  
746 associated motif and all positions that are not conserved in the reference model but that are conserved in  
747 some other model in the list.

### 748 1.1 Comparison with other tools

749 CUPP (Barrett and Lange, 2019) and PANTHER (Mi *et al.*, 2012, 2013) have been used for comparison.  
750 CUPP v1.0.14 was run with `CUPPclustering.py` and parameter `-cluster` to execute the clustering (<http://www.bioengineering.dtu.dk/CUPP>). The PANTHER HMM library version 15.0 and the pantherScore2.2  
751 tool (scoring protein sequences against the library) were retrieved at <http://www.pantherdb.org>. We used  
752 `pantherScore2.2.pl` with parameters `-l [PANTHER15.0_library] -D B -n`, where `-D B` allows to visualise  
753 the best hit in the output and `-n` allows to visualize family and subfamily names in the output.

### 755 Evaluation

756 For each protein family, we considered functionally characterised pools of sequences collected from the  
757 literature and classified them in groups with ProfileView. To evaluate what proportion of sequences with a  
758 specific function is correctly classified by ProfileView, we used the Recall measure, defined as  $TP/TP+FN$ ,  
759 where TP is the number of sequences that ProfileView classifies correctly and FN is the number of sequences  
760 that it classifies in the wrong group. The idea is to evaluate in which manner ProfileView captures as many  
761 positives as possible.

### 762 Computing time

763 The most costly computational part of the pipeline is the construction of the probabilistic models for a  
764 protein sequence. The program was tested using 16 threads on a single machine equipped with an Intel  
765 Xeon E5-2670 CPU running at 2.60GHz, with 128 GB of RAM, and a Linux operating system (CentOS  
766 release 6.5). **Table S2** summarizes, for each protein family, the time complexity for the model library  
767 construction and the classification step. The time used for the model library construction depends on the

768 number of models and the length of the domain. Once a library is constructed, it can be used for the analysis  
769 of different protein families. Note that the same library constructed for the Radical SAM domain was used  
770 for both the analysis of the Methylthiotransferase family and the SPASM/twitch domain containing family.

771 Note that, for the WW domain family, (Tubiana *et al.*, 2019) indicates about 1-2 days of computing time  
772 on an Intel Xeon Phi processor with  $2 \times 28$  cores to run RBM analysis. ProfileView classifies this family in  
773 less than 9 hours (**Table S2**).

## 774 **Implementation and software availability**

775 ProfileView has been developed and tested under a UNIX operating system, using Bash, Python, and R  
776 scripts. It exploits GNU parallel (Tange, 2018), if available on the system, in order to perform some jobs  
777 in parallel. It is implemented in three main parts carrying out the following modules of the pipeline:  
778 the construction of a single-domain model library, the generation of the ProfileView tree along with its  
779 representative models, the comparison of selected representative models and the identification of conserved  
780 positions/motifs. ProfileView is available at <http://www.lcqb.upmc.fr/profileview/> under the version  
781 2.1 of the CeCILL Free Software License.

## 782 **Data accessibility**

783 The set of sequences used in the analysis and the model libraries, distance trees, ProfileView trees generated  
784 and discussed in the article (Cryptochrome/Photolyase Family, the WW domain family, the glycoside hy-  
785 drolase enzymes family GH30, the four enzyme superfamilies of the Structure-Function Linkage Database)  
786 are available at <http://www.lcqb.upmc.fr/profileview/>.

## 787 **Discussion**

788 The availability of large quantities of (meta)genomic data is allowing for a deeper exploration of living or-  
789 ganisms and of the processes underpinning their genetic, phylogenetic and functional diversification. Com-  
790 putational approaches, able to highlight these diversities and to identify what is functionally new within the  
791 realm of sequence information, will make the first fundamental step in the discovery of new candidates to  
792 be experimentally tested for their functional activity. Moreover, due to the huge quantity of sequences to  
793 be acquired in years to come (1 zetta-bases/year are expected in 2025 (Stephens *et al.*, 2015)), there will be  
794 no more way to look into this mass of data with an “expert eye” and computational approaches will play a  
795 key role on the extraction of novel information and in functional classification.

796 Today, we can characterise homologs based on their similarity through distance measures modelling the  
797 evolution of the entire sequences. However, as shown here and elsewhere (Schnoes *et al.*, 2009; Mi *et al.*, 2012;  
798 Akiva *et al.*, 2014; Barrett and Lange, 2019), this computational approach is insufficient to provide insights



799 on protein functional activities, and a large number of sequences remain not yet functionally annotated.  
800 Some of these protein families, like the seven families discussed in this study, are extremely important in  
801 medicine, biology, environmental science and biotechnology due to their key roles in cancer biology, DNA  
802 repair, drug delivery strategies, chronobiology and photobiology, specific enzymatic reactions, the formation  
803 of protein-protein interaction networks, optogenetics. Thanks to their key role, for decades now, experiments  
804 have accumulated a huge amount of functional information that we used to validate the ProfileView approach.  
805 ProfileView functional organisation of these seven families agrees with experimental evidence.

806 ProfileView highlights that protein functional classification depends on a non-linear contribution of many  
807 probabilistic models and that conserved patterns in sequences are not sufficient alone to discriminate diver-  
808 sified functions of complex protein families. This change of perspective in functional classification, underlies  
809 the complexity of the question and explains why this problem is wide open today despite the clear interest in  
810 classifying protein families that have been amply studied in molecular biology, like transporters, signalling,  
811 transcription factors.

812 By constructing multiple probabilistic profiles characterising different conserved motifs in homologous  
813 domain sequences, ProfileView captures functional signals and, by combining them, is able to successfully  
814 classify large datasets. The main advantages of ProfileView approach compared to those developed before are  
815 as follows: (i) it is alignment-free and avoids errors due to the difficulty of comparing distant homologues; (ii)  
816 several probabilistic models represent more precisely than a single consensus models the functional variability  
817 of protein families; (iii) large quantities of data are not needed to learn features and run the classification;  
818 (iv) functional annotation of many sequences does not need to be known to explore with precision the  
819 space of sequences and classify them; (v) it is a general approach applicable to proteins of arbitrary length  
820 and function. Moreover, once a domain library is constructed, ProfileView is computationally efficient in  
821 screening very large sets of homologous sequences in a reasonable time.

822 ProfileView demonstrated to discover potentially interesting CPF proteins whose function could be ex-  
823 perimentally tested with the purpose of enlarging our understanding of the mechanisms exploiting light  
824 to perform functional activities in natural environments. These proteins are of interest for biotechnology  
825 and any computational approach to highlight them is desired. It also organised the WW domain family in  
826 subtrees of sequences, corresponding to a large spectrum of differences in binding affinity to various ligands,  
827 which have been experimentally observed. It demonstrates that a large variety of sequence motifs covers  
828 this spectrum and it identifies these motifs. It could classify protein superfamilies in the manually curated  
829 CAZy and SFLD databases by accurately identifying differences in their multiple enzymatic reactions. Com-  
830 pared to Tubiana *et al* (Tubiana *et al.*, 2019), a computational approach also based on sequence analysis,  
831 it describes differences among binding motifs in much greater detail, opening new avenues in the discovery  
832 of alternative binding patterns in protein-protein interaction networks. It has been compared favorably to

833 other classification tools like PANTHER and CUPP, on the CPF, the WW domains and the GH30 family  
834 classified in the Carbohydrate-Active Enzymes database CAZy.

835 On the methodological side, ProfileView addresses the problem of extracting biological information on  
836 protein families from the huge space of natural sequences, and the sampling of distant sequences could be  
837 realised using different distance measures. This is an important direction of investigation possibly leading  
838 to more refined biological information extracted from sequences.

839 From the algorithmic point of view, ProfileView is surprisingly simple compared to the Restricted Boltz-  
840 mann Machines (RBM) model used in (Tubiana *et al.*, 2019) to classify WW domain homologs. RBM,  
841 is a generative stochastic (single layer) artificial neural network that learns collective modes by extract-  
842 ing short sequence motifs from sets of sequences based on correlation patterns among alignment positions.  
843 These motifs might reveal structural, functional and phylogenetic features and they are used to define a  
844 representation space where to classify sequences. RBM generative nature makes training challenging by an  
845 algorithmic point of view since it requires intensive sampling from large training sets. In contrast, Profile-  
846 View constructs probabilistic profiles from close neighbours of distant homologous sequences (demanding a  
847 very small number of sequences, a minimum of 20) in sequence space, making no use of positional correla-  
848 tions nor of their generative modelling. Its probabilistic models encode conserved patterns ignoring those  
849 parts of the homologous sequences appearing variable (see discussion on the two CPF sequences U5NDX3  
850 and R7UL99 above). The number of models is not a restriction for the construction of the classification  
851 space. A possible direction of investigation is the design of multiple layers (of models) for an architecture  
852 that analyses finer motifs as well as proteins comprising multiple domains.

853 The fine understanding of functional mechanisms might need more sophisticated computational ap-  
854 proaches than ProfileView. For instance, for CPF classification which is based on the FAD binding domain,  
855 ProfileView highlights functional differences between large classes of CPF sequences, helping to model the  
856 proximity between these classes with an appropriate identification of a functional tree topology. To find  
857 functional differences within classes and to anticipate the existence of a double function (see **Fig. S1**), the  
858 entire CPF sequence might be necessary, possibly because of the interaction between domains which might  
859 have functional consequences as highlighted in (Rosensweig *et al.*, 2018).

860 Last, even if ProfileView has been applied here to the classification of entire protein sequences, it can  
861 handle metagenomics sequences as well. In this respect, it is important to highlight that the majority of  
862 metagenomics and metatranscriptomics data come from organisms that cannot be cultured and that will,  
863 possibly, never be isolated. Hence, conceptual new approaches to explore their biology in complex ecosystems  
864 is desperately needed. ProfileView allows to increase knowledge on the biology of organisms whose ecological  
865 role has been recognised (*e.g.* marine microbes) but that are still not accessible to functional investigations,  
866 opening a new avenue to functional exploration.

## 867 **Availability of data and materials**

868 The set of sequences for CPF, FAD, WW domain, Glyco-hydro-30 and Glyco-hydro-30-2 for GH30, HAD  
869 and HAD\_2 for Haloacid Dehalogenase, B12-binding and B12-binding\_2 for B12-binding domain containing,  
870 Radical SAM for Methylthiotransferase and SPASM/twitch domain containing subgroups, and SPASM  
871 for SPASM/twitch domain containing subgroup, model libraries, phylogenetic trees, ProfileView trees are  
872 available at <http://www.lcqb.upmc.fr/profileview/>.

## 873 **Competing interests**

874 The corresponding author declares that there are no financial nor non-financial competing interests on behalf  
875 of all authors.

## 876 **Funding**

877 LabEx CALSIMLAB (public grant ANR-11-LABX-0037-01 constituting a part of the "Investissements  
878 d'Avenir" Program ANR-11-IDEX-0004-02) (RV); the Institut Universitaire de France (AC); access to the  
879 HPC resources of the Institute for Scientific Computing and Simulation (Equip@Meso project - ANR-  
880 10-EQPX- 29-01, Excellence Program "Investissement d'Avenir") (AC); Fondation Bettencourt-Schueller  
881 (Coups d'Élan pour la Recherche Française-2018) (AF); LabEx DYNAMO (public grant ANR-11-LABX-  
882 0011-01) (AF).

## 883 **Authors' contributions**

884 RV and AC conceived and designed the experiments. RV performed the experiments. EL performed the  
885 structural analysis of CPF classes. RV, JPB, AF and AC analyzed the data. AC, RV, JPB and AF wrote  
886 the paper. All authors read and approved the final manuscript.

## 887 **Acknowledgements**

888 We thank Simona Cocco and Jérôme Tubiana for providing to us the dataset of WW sequences used in their  
889 study.

## 890 **References**

891 Akiva, E., Brown, S., Almonacid, D. E., Barber 2nd, A. E., Custer, A. F., Hicks, M. A., Huang, C. C.,  
892 Lauck, F., Mashiyama, S. T., Meng, E. C., *et al.* (2014). The structure–function linkage database. *Nucleic*  
893 *acids research*, **42**(D1), D521–D530.

- 894 Altschul, S. F., Madden, T. L., Schäffer, A. A., Zhang, J., Zhang, Z., Miller, W., and Lipman, D. J. (1997).  
895 Gapped blast and psi-blast: a new generation of protein database search programs. *Nucleic acids research*,  
896 **25**(17), 3389–3402.
- 897 Amato, A., Dell’Aquila, G., Musacchia, F., Annunziata, R., Ugarte, A., Maillet, N., Carbone, A., d’Alcalà,  
898 M. R., Sanges, R., Iudicone, D., *et al.* (2017). Marine diatoms change their gene expression profile when  
899 exposed to microscale turbulence under nutrient replete conditions. *Scientific Reports*, **7**.
- 900 Barrett, C., Hughey, R., and Karplus, K. (1997). Scoring hidden markov models. *Bioinformatics*, **13**(2),  
901 191–199.
- 902 Barrett, K. and Lange, L. (2019). Peptide-based functional annotation of carbohydrate-active enzymes by  
903 conserved unique peptide patterns (cupp). *Biotechnology for biofuels*, **12**(1), 102.
- 904 Bernardes, J., Zaverucha, G., Vaquero, C., and Carbone, A. (2016). Improvement in protein domain identi-  
905 fication is reached by breaking consensus, with the agreement of many profiles and domain co-occurrence.  
906 *PLoS computational biology*, **12**(7), e1005038.
- 907 Björn, L. O. (2015). *Photobiology: The science of light and life*. Springer.
- 908 Boari de Lima, E., Meira, W., and Melo-Minardi, R. C. d. (2016). Isofunctional protein subfamily detection  
909 using data integration and spectral clustering. *PLoS computational biology*, **12**(6), e1005001.
- 910 Bonetta, R. and Valentino, G. (2020). Machine learning techniques for protein function prediction. *Proteins:  
911 Structure, Function, and Bioinformatics*, **88**(3), 397–413.
- 912 Brautigam, C. A., Smith, B. S., Ma, Z., Palnitkar, M., Tomchick, D. R., Machius, M., and Deisenhofer, J.  
913 (2004). Structure of the photolyase-like domain of cryptochrome 1 from arabidopsis thaliana. *Proceedings  
914 of the National Academy of Sciences*, **101**(33), 12142–12147.
- 915 Brettel, K. and Byrdin, M. (2010). Reaction mechanisms of dna photolyase. *Current opinion in structural  
916 biology*, **20**(6), 693–701.
- 917 Cao, M., Pietras, C. M., Feng, X., Doroschak, K. J., Schaffner, T., Park, J., Zhang, H., Cowen, L. J.,  
918 and Hescott, B. J. (2014). New directions for diffusion-based network prediction of protein function:  
919 incorporating pathways with confidence. *Bioinformatics*, **30**(12), i219–i227.
- 920 Cao, R. and Cheng, J. (2016). Integrated protein function prediction by mining function associations,  
921 sequences, and protein–protein and gene–gene interaction networks. *Methods*, **93**, 84–91.
- 922 Capella-Gutiérrez, S., Silla-Martínez, J. M., and Gabaldón, T. (2009). trimal: a tool for automated alignment  
923 trimming in large-scale phylogenetic analyses. *Bioinformatics*, **25**(15), 1972–1973.

- 924 Chaves, I., Yagita, K., Barnhoorn, S., Okamura, H., van der Horst, G. T., and Tamanini, F. (2006).  
925 Functional evolution of the photolyase/cryptochrome protein family: importance of the c terminus of  
926 mammalian cry1 for circadian core oscillator performance. *Molecular and cellular biology*, **26**(5), 1743–  
927 1753.
- 928 Chaves, I., Pokorny, R., Byrdin, M., Hoang, N., Ritz, T., Brettel, K., Essen, L.-O., van der Horst, G. T.,  
929 Batschauer, A., and Ahmad, M. (2011). The cryptochromes: blue light photoreceptors in plants and  
930 animals. *Annual review of plant biology*, **62**, 335–364.
- 931 Clark, W. T. and Radivojac, P. (2011). Analysis of protein function and its prediction from amino acid  
932 sequence. *Proteins: Structure, Function, and Bioinformatics*, **79**(7), 2086–2096.
- 933 Coesel, S., Mangogna, M., Ishikawa, T., Heijde, M., Rogato, A., Finazzi, G., Todo, T., Bowler, C., and  
934 Falciatore, A. (2009). Diatom ptcpf1 is a new cryptochrome/photolyase family member with dna repair  
935 and transcription regulation activity. *EMBO reports*, **10**(6), 655–661.
- 936 Crooks, G. E., Hon, G., Chandonia, J.-M., and Brenner, S. E. (2004). Weblogo: a sequence logo generator.  
937 *Genome research*, **14**(6), 1188–1190.
- 938 Czarna, A., Berndt, A., Singh, H. R., Grudziecki, A., Ladurner, A. G., Timinszky, G., Kramer, A., and  
939 Wolf, E. (2013). Structures of drosophila cryptochrome and mouse cryptochrome1 provide insight into  
940 circadian function. *Cell*, **153**(6), 1394–1405.
- 941 Darriba, D., Taboada, G. L., Doallo, R., and Posada, D. (2011). Protest 3: fast selection of best-fit models  
942 of protein evolution. *Bioinformatics (Oxford, England)*, **27**(8), 1164–1165.
- 943 Dawson, N. L., Lewis, T. E., Das, S., Lees, J. G., Lee, D., Ashford, P., Orengo, C. A., and Sillitoe, I. (2017).  
944 Cath: an expanded resource to predict protein function through structure and sequence. *Nucleic acids*  
945 *research*, **45**(D1), D289–D295.
- 946 De Filippo, C., Ramazzotti, M., Fontana, P., and Cavalieri, D. (2012). Bioinformatic approaches for func-  
947 tional annotation and pathway inference in metagenomics data. *Briefings in bioinformatics*, **13**(6), 696–  
948 710.
- 949 Deng, M., Zhang, K., Mehta, S., Chen, T., and Sun, F. (2002). Prediction of protein function using  
950 protein-protein interaction data. In *Proceedings. IEEE Computer Society Bioinformatics Conference*,  
951 pages 197–206. IEEE.
- 952 Eddy, S. R. (1998). Profile hidden markov models. *Bioinformatics (Oxford, England)*, **14**(9), 755–763.
- 953 Eddy, S. R. (2011). Accelerated profile hmm searches. *PLOS Computational Biology*, **7**(10), 1–16.

- 954 Edgar, R. C. (2004). Muscle: multiple sequence alignment with high accuracy and high throughput. *Nucleic*  
955 *acids research*, **32**(5), 1792–1797.
- 956 Eisen, J. A. (1998). Phylogenomics: improving functional predictions for uncharacterized genes by evolu-  
957 tionary analysis. *Genome research*, **8**(3), 163–167.
- 958 Emmerich, H.-J., Saft, M., Schneider, L., Kock, D., Batschauer, A., and Essen, L.-O. (2020). A topologically  
959 distinct class of photolyases specific for uv lesions within single-stranded dna. *Nucleic Acids Research*,  
960 **48**(22), 12845–12857.
- 961 Engelhardt, B. E., Jordan, M. I., Muratore, K. E., and Brenner, S. E. (2005). Protein molecular function  
962 prediction by bayesian phylogenomics. *PLoS Comput Biol*, **1**(5), e45.
- 963 Engelhardt, B. E., Jordan, M. I., Srouji, J. R., and Brenner, S. E. (2011). Genome-scale phylogenetic  
964 function annotation of large and diverse protein families. *Genome research*, **21**(11), 1969–1980.
- 965 Essen, L.-O., Franz, S., and Banerjee, A. (2017). Structural and evolutionary aspects of algal blue light  
966 receptors of the cryptochrome and aureochrome type. *Journal of plant physiology*, **217**, 27–37.
- 967 Finn, R. D., Bateman, A., Clements, J., Coggill, P., Eberhardt, R. Y., Eddy, S. R., Heger, A., Hetherington,  
968 K., Holm, L., Mistry, J., Sonnhammer, E. L. L., Tate, J., and Punta, M. (2014). Pfam: the protein  
969 families database. *Nucleic Acids Research*, **42**(D1), D222–D230.
- 970 Fortunato, A. E., Annunziata, R., Jaubert, M., Bouly, J.-P., and Falciatore, A. (2015). Dealing with light:  
971 the widespread and multitasking cryptochrome/photolyase family in photosynthetic organisms. *Journal*  
972 *of plant physiology*, **172**, 42–54.
- 973 Fortunato, A. E., Jaubert, M., Enomoto, G., Bouly, J.-P., Raniello, R., Thaler, M., Malviya, S., Bernardes,  
974 J. S., Rappaport, F., Gentili, B., *et al.* (2016). Diatom phytochromes reveal the existence of far-red light  
975 based sensing in the ocean. *The Plant Cell*, pages tpc-00928.
- 976 Franz, S., Ignatz, E., Wenzel, S., Zielosko, H., Putu, E. P. G. N., Maestre-Reyna, M., Tsai, M.-D., Ya-  
977 mamoto, J., Mittag, M., and Essen, L.-O. (2018). Structure of the bifunctional cryptochrome acry from  
978 *chlamydomonas reinhardtii*. *Nucleic acids research*, **46**(15), 8010–8022.
- 979 Furnham, N., Sillitoe, I., Holliday, G. L., Cuff, A. L., Rahman, S. A., Laskowski, R. A., Orengo, C. A., and  
980 Thornton, J. M. (2012). Funtree: a resource for exploring the functional evolution of structurally defined  
981 enzyme superfamilies. *Nucleic acids research*, **40**(D1), D776–D782.
- 982 Gabaldón, T. and Koonin, E. V. (2013). Functional and evolutionary implications of gene orthology. *Nature*  
983 *Reviews Genetics*, **14**(5), 360–366.

- 984 Gaudet, P., Livstone, M. S., Lewis, S. E., and Thomas, P. D. (2011). Phylogenetic-based propagation of  
985 functional annotations within the gene ontology consortium. *Briefings in bioinformatics*, **12**(5), 449–462.
- 986 Guindon, S., Dufayard, J.-F., Lefort, V., Anisimova, M., Hordijk, W., and Gascuel, O. (2010). New algo-  
987 rithms and methods to estimate maximum-likelihood phylogenies: Assessing the performance of phylml  
988 3.0. *Systematic Biology*, **59**(3), 307–321.
- 989 Gumerov, V. M. and Zhulin, I. B. (2020). Trend: a platform for exploring protein function in prokaryotes  
990 based on phylogenetic, domain architecture and gene neighborhood analyses. *Nucleic Acids Research*.
- 991 Hawkins, T., Luban, S., and Kihara, D. (2006). Enhanced automated function prediction using distantly  
992 related sequences and contextual association by pfp. *Protein Science*, **15**(6), 1550–1556.
- 993 Heijde, M., Zabulon, G., Corellou, F., Ishikawa, T., Brazard, J., Usman, A., Sanchez, F., Plaza, P., Martin,  
994 M., Falciatore, A., *et al.* (2010). Characterization of two members of the cryptochrome/photolyase family  
995 from *ostreococcus tauri* provides insights into the origin and evolution of cryptochromes. *Plant, cell &*  
996 *environment*, **33**(10), 1614–1626.
- 997 Hirano, A., Yumimoto, K., Tsunematsu, R., Matsumoto, M., Oyama, M., Kozuka-Hata, H., Nakagawa,  
998 T., Lanjakornsiripan, D., Nakayama, K. I., and Fukada, Y. (2013). Fbxl21 regulates oscillation of the  
999 circadian clock through ubiquitination and stabilization of cryptochromes. *Cell*, **152**(5), 1106–1118.
- 1000 Hirano, A., Braas, D., Fu, Y.-H., and Ptáček, L. J. (2017). Fad regulates cryptochrome protein stability  
1001 and circadian clock in mice. *Cell reports*, **19**(2), 255–266.
- 1002 Ingham, R. J., Colwill, K., Howard, C., Dettwiler, S., Lim, C. S., Yu, J., Hersi, K., Raaijmakers, J., Gish, G.,  
1003 Mbamalu, G., *et al.* (2005). Ww domains provide a platform for the assembly of multiprotein networks.  
1004 *Molecular and cellular biology*, **25**(16), 7092–7106.
- 1005 Jaubert, M., Bouly, J.-P., d’Alcalà, M. R., and Falciatore, A. (2017). Light sensing and responses in marine  
1006 microalgae. *Current Opinion in Plant Biology*, **37**, 70–77.
- 1007 Karchin, R., Kelly, L., and Sali, A. (2005). Improving functional annotation of non-synonymous snps with  
1008 information theory. In *Biocomputing 2005*, pages 397–408. World Scientific.
- 1009 Kulmanov, M. and Hoehndorf, R. (2020). Deepgoplus: improved protein function prediction from sequence.  
1010 *Bioinformatics*, **36**(2), 422–429.
- 1011 Lee, D., Redfern, O., and Orengo, C. (2007). Predicting protein function from sequence and structure.  
1012 *Nature reviews molecular cell biology*, **8**(12), 995–1005.

- 1013 Letovsky, S. and Kasif, S. (2003). Predicting protein function from protein/protein interaction data: a  
1014 probabilistic approach. *Bioinformatics*, **19**(suppl\_1), i197–i204.
- 1015 Letunic, I. and Bork, P. (2019). Interactive tree of life (itol) v4: recent updates and new developments.  
1016 *Nucleic acids research*.
- 1017 Liu, H., Gomez, G., Lin, S., Lin, S., and Lin, C. (2012). Optogenetic control of transcription in zebrafish.  
1018 *PloS one*, **7**(11), e50738.
- 1019 Loewenstein, Y., Raimondo, D., Redfern, O. C., Watson, J., Frishman, D., Linial, M., Orengo, C., Thornton,  
1020 J., and Tramontano, A. (2009). Protein function annotation by homology-based inference. *Genome biology*,  
1021 **10**(2), 1–8.
- 1022 Lombard, V., Golaconda Ramulu, H., Drula, E., Coutinho, P. M., and Henrissat, B. (2014). The  
1023 carbohydrate-active enzymes database (cazy) in 2013. *Nucleic acids research*, **42**(D1), D490–D495.
- 1024 Lucas-Lledó, J. I. and Lynch, M. (2009). Evolution of mutation rates: phylogenomic analysis of the pho-  
1025 tolyase/cryptochrome family. *Molecular biology and evolution*, **26**(5), 1143–1153.
- 1026 Mei, Q. and Dvornyk, V. (2015). Evolutionary history of the photolyase/cryptochrome superfamily in  
1027 eukaryotes. *PloS one*, **10**(9), e0135940.
- 1028 Mi, H., Muruganujan, A., and Thomas, P. D. (2012). Panther in 2013: modeling the evolution of gene  
1029 function, and other gene attributes, in the context of phylogenetic trees. *Nucleic acids research*, **41**(D1),  
1030 D377–D386.
- 1031 Mi, H., Muruganujan, A., Casagrande, J. T., and Thomas, P. D. (2013). Large-scale gene function analysis  
1032 with the panther classification system. *Nature protocols*, **8**(8), 1551–1566.
- 1033 Mirdita, M., von den Driesch, L., Galiez, C., Martin, M. J., Söding, J., and Steinegger, M. (2017). Uniclust  
1034 databases of clustered and deeply annotated protein sequences and alignments. *Nucleic acids research*,  
1035 **45**(D1), D170–D176.
- 1036 Nabieva, E., Jim, K., Agarwal, A., Chazelle, B., and Singh, M. (2005). Whole-proteome prediction of protein  
1037 function via graph-theoretic analysis of interaction maps. *Bioinformatics*, **21**(suppl\_1), i302–i310.
- 1038 Orth, C., Niemann, N., Hennig, L., Essen, L.-O., and Batschauer, A. (2017). Hyperactivity of the arabidopsis  
1039 cryptochrome (cry1) l407f mutant is caused by a structural alteration close to the cry1 atp-binding site.  
1040 *Journal of Biological Chemistry*, **292**(31), 12906–12920.



- 1041 Otte, L., Wiedemann, U., Schlegel, B., Pires, J. R., Beyermann, M., Schmieder, P., Krause, G., Volkmer-  
1042 Engert, R., Schneider-Mergener, J., and Oschkinat, H. (2003). Ww domain sequence activity relationships  
1043 identified using ligand recognition propensities of 42 ww domains. *Protein Science*, **12**(3), 491–500.
- 1044 Ozkan-Dagliyan, I., Chiou, Y.-Y., Ye, R., Hassan, B. H., Ozturk, N., and Sancar, A. (2013). Formation of  
1045 arabidopsis cryptochrome 2 photobodies in mammalian nuclei application as an optogenetic dna damage  
1046 checkpoint switch. *Journal of Biological Chemistry*, **288**(32), 23244–23251.
- 1047 Ozturk, N. (2017). Phylogenetic and functional classification of the photolyase/cryptochrome family. *Pho-*  
1048 *tochemistry and photobiology*, **93**(1), 104–111.
- 1049 Pal, D. and Eisenberg, D. (2005). Inference of protein function from protein structure. *Structure*, **13**(1),  
1050 121–130.
- 1051 Pazos, F. and Sternberg, M. J. (2004). Automated prediction of protein function and detection of functional  
1052 sites from structure. *Proceedings of the National Academy of Sciences*, **101**(41), 14754–14759.
- 1053 Pham, M. and Lichtarge, O. (2020). Graph-based information diffusion method for prioritizing functionally  
1054 related genes in protein-protein interaction networks. In *Pacific Symposium on Biocomputing. Pacific*  
1055 *Symposium on Biocomputing*, volume 25, page 439. World Scientific.
- 1056 Ponting, C. P. and Dickens, N. J. (2001). Genome cartography through domain annotation. *Genome biology*,  
1057 **2**(7), comment2006–1.
- 1058 Prakash, T. and Taylor, T. D. (2012). Functional assignment of metagenomic data: challenges and applica-  
1059 tions. *Briefings in bioinformatics*, **13**(6), 711–727.
- 1060 Remmert, M., Biegert, A., Hauser, A., and Söding, J. (2011). Hhblits: lightning-fast iterative protein  
1061 sequence searching by hmm-hmm alignment. *Nature Methods*, **9**, 173–.
- 1062 Rodgers, C. T. and Hore, P. J. (2009). Chemical magnetoreception in birds: the radical pair mechanism.  
1063 *Proceedings of the National Academy of Sciences*, **106**(2), 353–360.
- 1064 Rosensweig, C., Reynolds, K. A., Gao, P., Laothamatas, I., Shan, Y., Ranganathan, R., Takahashi, J. S.,  
1065 and Green, C. B. (2018). An evolutionary hotspot defines functional differences between cryptochromes.  
1066 *Nature communications*, **9**(1), 1138.
- 1067 Russ, W. P., Lowery, D. M., Mishra, P., Yaffe, M. B., and Ranganathan, R. (2005). Natural-like function in  
1068 artificial ww domains. *Nature*, **437**(7058), 579.
- 1069 Sahraeian, S. M., Luo, K. R., and Brenner, S. E. (2015). Sifter search: a web server for accurate phylogeny-  
1070 based protein function prediction. *Nucleic acids research*, **43**(W1), W141–W147.

- 1071 Sancar, A. (2003). Structure and function of dna photolyase and cryptochrome blue-light photoreceptors.  
1072 *Chemical reviews*, **103**(6), 2203–2238.
- 1073 Sato, R., Harada, R., and Shigeta, Y. (2018). The binding structure and affinity of photodamaged du-  
1074 plex dna with members of the photolyase/cryptochrome family: A computational study. *Biophysics and*  
1075 *physicobiology*, **15**, 18–27.
- 1076 Scheerer, P., Zhang, F., Kalms, J., von Stetten, D., Krauß, N., Oberpichler, I., and Lamparter, T. (2015). The  
1077 class iii cyclobutane pyrimidine dimer photolyase structure reveals a new antenna chromophore binding  
1078 site and alternative photoreduction pathways. *Journal of Biological Chemistry*, **290**(18), 11504–11514.
- 1079 Schmalen, I., Reischl, S., Wallach, T., Klemz, R., Grudziecki, A., Prabu, J. R., Benda, C., Kramer, A., and  
1080 Wolf, E. (2014). Interaction of circadian clock proteins cry1 and per2 is modulated by zinc binding and  
1081 disulfide bond formation. *Cell*, **157**(5), 1203–1215.
- 1082 Schneider, T. D. and Stephens, R. M. (1990). Sequence logos: a new way to display consensus sequences.  
1083 *Nucleic acids research*, **18**(20), 6097–6100.
- 1084 Schnoes, A. M., Brown, S. D., Dodevski, I., and Babbitt, P. C. (2009). Annotation error in public databases:  
1085 misannotation of molecular function in enzyme superfamilies. *PLoS Comput Biol*, **5**(12), e1000605.
- 1086 Sharan, R., Ulitsky, I., and Shamir, R. (2007). Network-based prediction of protein function. *Molecular*  
1087 *systems biology*, **3**(1), 88.
- 1088 Shin, H., Lisewski, A. M., and Lichtarge, O. (2007). Graph sharpening plus graph integration: a synergy  
1089 that improves protein functional classification. *Bioinformatics*, **23**(23), 3217–3224.
- 1090 Stephens, Z. D., Lee, S. Y., Faghri, F., Campbell, R. H., Zhai, C., Efron, M. J., Iyer, R., Schatz, M. C.,  
1091 Sinha, S., and Robinson, G. E. (2015). Big data: astronomical or genomical? *PLoS biology*, **13**(7),  
1092 e1002195.
- 1093 Sudol, M. and Hunter, T. (2000). New wrinkles for an old domain. *Cell*, **103**(7), 1001–1004.
- 1094 Tange, O. (2018). *GNU Parallel 2018*. Ole Tange.
- 1095 Törönen, P., Medlar, A., and Holm, L. (2018). Pannzer2: a rapid functional annotation web server. *Nucleic*  
1096 *acids research*, **46**(W1), W84–W88.
- 1097 Tubiana, J., Cocco, S., and Monasson, R. (2019). Learning protein constitutive motifs from sequence data.  
1098 *eLife*, **8**, e39397.

- 1099 Ugarte, A., Vicedomini, R., Bernardes, J., and Carbone, A. (2018). A multi-source domain annotation  
1100 pipeline for quantitative metagenomic and metatranscriptomic functional profiling. *Microbiome*, **6**(1),  
1101 149.
- 1102 Vazquez, A., Flammini, A., Maritan, A., and Vespignani, A. (2003). Global protein function prediction from  
1103 protein-protein interaction networks. *Nature biotechnology*, **21**(6), 697–700.
- 1104 Wan, C. and Jones, D. T. (2020). Protein function prediction is improved by creating synthetic feature  
1105 samples with generative adversarial networks. *Nature Machine Intelligence*, **2**(9), 540–550.
- 1106 Wass, M. N. and Sternberg, M. J. (2008). Confunc—functional annotation in the twilight zone. *Bioinforma-*  
1107 *tics*, **24**(6), 798–806.
- 1108 Wen, Z.-n., Wang, K.-l., Li, M.-l., Nie, F.-s., and Yang, Y. (2005). Analyzing functional similarity of protein  
1109 sequences with discrete wavelet transform. *Computational biology and chemistry*, **29**(3), 220–228.
- 1110 Worthington, E. N., Kavakli, İ. H., Berrocal-Tito, G., Bondo, B. E., and Sancar, A. (2003). Purification  
1111 and characterization of three members of the photolyase/cryptochrome family blue-light photoreceptors  
1112 from vibrio cholerae. *Journal of Biological Chemistry*, **278**(40), 39143–39154.
- 1113 Zhang, C., Freddolino, P. L., and Zhang, Y. (2017). Cofactor: improved protein function prediction by com-  
1114 bining structure, sequence and protein–protein interaction information. *Nucleic acids research*, **45**(W1),  
1115 W291–W299.

## 1116 SUPPLEMENTARY FILE

### 1117 1. Functional diversification of CPF

1118 Photolyases are photoactive enzymes that bind DNA and use blue light to mend two different types of  
1119 UV-induced DNA damage, either ss/dsDNA cyclobutane pyrimidine dimer (CPD) or (6-4) pyrimidine-  
1120 pyrimidone photoproducts, and are thus classified as either CPD or (6-4) photolyases. Moreover, some  
1121 photolyases such as CRY-DASH can only bind and repair ssDNA CPD. The weaker DNA photolyase activ-  
1122 ity of CRY-DASH has been reported as a consequence of lower DNA binding affinity than CPD photolyase  
1123 (Sato *et al.*, 2018). Cryptochromes (CRY) do not bind DNA and are mainly photoreceptors (PR) (specifically  
1124 noted PR CRY in the following) involved in many biological responses to light (*e.g.* photomorphogenesis, en-  
1125 trainment of the circadian clock). However, some CRYs are also light-independent transcriptional regulators  
1126 taking part in the central circadian oscillator generating biological rhythms.

1127 In the last decade, new CPF variants, exhibiting different photobiological properties or functions, have  
1128 been discovered, changing current views on their evolution (Jaubert *et al.*, 2017) and functional diversification  
1129 (Coesel *et al.*, 2009; Heijde *et al.*, 2010; Fortunato *et al.*, 2015; Essen *et al.*, 2017). The initially proposed  
1130 functional separation between CRYs and PLs has gradually started to vanish, as there are now several  
1131 examples of CPF members exhibiting both functions (Coesel *et al.*, 2009; Heijde *et al.*, 2010; Franz *et al.*,  
1132 2018). Some CPF members have even been used for optogenetic applications (Ozkan-Dagliyan *et al.*, 2013;  
1133 Liu *et al.*, 2012) or proposed as magnetoreceptors (Rodgers and Hore, 2009).

1134 Although a lot of experimental progress has been made, CPF functions could not be anticipated by the  
1135 analysis of domain organisation due to a very simplified architecture of the CPF sequences, nor by structural  
1136 properties due to the high similarity of their protein structures, nor by primary protein sequences. Tools  
1137 employed for the phylogenetic reconstruction of this family (Chaves *et al.*, 2006; Lucas-Lledó and Lynch,  
1138 2009; Mei and Dvornyk, 2015; Ozturk, 2017) did not allow to resolve different functions (*e.g.*, light-dependent  
1139 DNA photolyases and light-independent transcriptional regulators) or to anticipate the function of new CPF  
1140 sequences.

## 1141 2. ProfileView algorithm applied to the CPF family

1142 A hands-on description of our methodological approach is provided here for the analysis of the cryp-  
1143 tochrome/photolyase family (CPF). ProfileView bases the analysis on the FAD binding domain, occurring  
1144 in all CPF sequences, and considers the set  $\mathcal{S}_{\text{CPF}}$  of 397 CPF sequences spanning the whole phylogenetic  
1145 tree, of which 69 are functionally characterized CPF homologs and the remaining ones are known function-  
1146 ally uncharacterised sequences. The ProfileView pipeline, comprising ten main steps, is illustrated by the  
1147 flowchart in **Fig. 6**.

1148 **I. Model library construction.** ProfileView constructs a library,  $\mathcal{M}_{\text{FAD}}$ , of probabilistic models (Eddy,  
1149 1998) for the *FAD binding domain of DNA photolyase* from Pfam version 31 (accession code PF03441),  
1150 due to its functional importance for CPF activity (**Fig. 1** and **Fig. 6**). More in detail, we **considered** all  
1151 4615 sequences which belong to the FULL alignment in Pfam. For each one of them, a CCM has been  
1152 constructed with the command mentioned above. Finally, our model library  $\mathcal{M}_{\text{FAD}}$  for the FAD-binding  
1153 domain comprises 3735 CCMs, because for some sequences we could not collect a minimum of 20 homologs.  
1154 The pipeline for  $\mathcal{M}_{\text{FAD}}$  construction is depicted in **Fig. 1A**.

1155 The set of Pfam sequences used to construct the ProfileView's model library for CPF is mainly different  
1156 from the set of classified sequences: among the 240 models taken into account for the classification of  
1157 the 307 sequences, just 17 of these models were built from a (Pfam) sequence in  $\mathcal{S}_{\text{CPF}}$  and only one is a  
1158 representative model (for the (6-4) PL subtree) in the ProfileView tree. Moreover, the average identity and  
1159 similarity (based on pairwise alignments) between the set of 307 sequences to classify and the set of the 240  
1160 sequences generating the models are 26.35% and 36.73%, respectively.

1161 **II. Sequence filtering.** After building  $\mathcal{M}_{\text{FAD}}$ , we discarded from  $\mathcal{S}_{\text{CPF}}$  all sequences against which we  
1162 were not able to find any domain hit (independently of the hit score).  $\mathcal{S}_{\text{CPF}}$  domain annotation was carried  
1163 out by considering HMMER best hits (version 3.1b2) for all models in  $\mathcal{M}_{\text{FAD}}$ . An a posteriori phylogenetic  
1164 analysis of the original set of CPF sequences has been carried out with RAxML version 8.2.11 (with parameter  
1165 `-m PROTGAMMAAUTO`). We observed that the set of discarded sequences, presenting no FAD binding domain  
1166 match, correspond to long branches in the tree (see **Fig. S28A**). This preliminary filter led us to consider  
1167 a set of 386 CPF sequences over the 397 we started with.

1168 **III. Sequence selection.** The 386 CPF sequences are then selected further by considering the full set of  
1169 models and evaluating the strength of their hits against the sequences. This testing is intended to discard  
1170 sequences that end with just a fragment of the domain (see **Fig. S28B**). The corresponding hits are expected  
1171 to be very weak and this concerned 79 CPF sequences. We remained with 307 sequences corresponding to  
1172 the leaves of the ProfileView tree. We refer to this reduced set as  $\mathcal{S}_{\text{CPF}}^*$ .

1173 **IV. Models filtering.** The rationale of this model filtering is to get rid of “noisy” models and significantly  
1174 reduce the size of  $\mathcal{M}_{\text{FAD}}$  down to a few hundred models. For the 307 CPF sequences, we extracted the three  
1175 models in  $\mathcal{M}_{\text{FAD}}$  that best match the sequence and make the union of all of them. Many CPF sequences  
1176 are best matched by the same models and the final set is comprised of 240 models that best identify the  
1177 presence of the FAD binding domain in CPF sequences. We refer to this reduced set as  $\mathcal{M}_{\text{FAD}}^*$ .

1178 **V. Association of two ProfileView scores to model hits: the normalized bit-score and the**  
1179 **normalized weighted bit-score.** To each hit, between a sequence  $s$  in  $\mathcal{S}_{\text{CPF}}^*$  and a model  $m$  in  $\mathcal{M}_{\text{FAD}}^*$ , we  
1180 applied the definitions of the two scores given in Methods and used all the scores to represent the sequence  
1181  $s$  as a vector of 480 dimensions.

1182 **VI. The construction of a ProfileView space of sequences.** This step contains the central idea of the  
1183 ProfileView method: each CCM is matched to each sequence to be classified and the scores of the hits (see  
1184 columns of real numbers in **Fig. 1B**) will provide a description of how close the model is to each sequence.  
1185 In its turn, a sequence can be represented by how close all models are to it through a vector of scores (see  
1186 rows of real numbers in **Fig. 1B**). In this way, we define a representation space of sequences that does not  
1187 reflect sequence similarity but, instead, the closeness of each sequence to each model. Since a match of a  
1188 model is evaluated by two scores (see V), the space will be a 480-dimensional space and each sequence will  
1189 be a point in the space.

1190 **VII. PCA and dimensionality reduction for ProfileView space of sequences.** For this step, we  
1191 used the parameter  $c = 99\%$ . From 480 dimensions, the reduction produced a space of 37 dimensions.

1192 **VIII. The ProfileView tree construction.** This step classifies the set of protein sequences in the 37-  
1193 dimensional space. For the generation of our ProfileView tree, we use a hierarchical clustering algorithm  
1194 which allows to build a tree that groups together the 307 sequences. The ProfileView tree built for the CPF  
1195 sequences is depicted in **Fig. S1**, where internal colours are identified by representative models (see below)  
1196 and external strips are associated with known functions (according to the literature, see **Supplemental**  
1197 **File** for the detailed list of publications).

1198 **IX. Association of representative models to ProfileView subtrees.** We associate several represen-  
1199 tative models to subtrees of the ProfileView tree following the procedure detailed in Methods. **Fig. S1**  
1200 indicates which nodes of the CPF tree are represented by a model.

1201 **X. Motifs extraction from representative models.** We extracted from each representative model  
1202 in **Fig. S1** associated with the colored functional subtrees, their corresponding functional motifs. They  
1203 represent the specificity of the sequences within each subtree.

### 3. Identification of known key residues by comparison of representative motifs in CPF

The comparison of ProfileView motifs' positions versus experimentally characterized positions is reported in our manually curated list "CPF\_mutants\_used\_for\_validation.xlsx". **Table S3** indicates how many ProfileView positions are validated by current experimental evidence.

Some positions in a motif might be conserved also in other motifs (corresponding to other subtrees), but some positions are motif specific, as illustrated by the colored dots in the logos of **Fig. S5** and **Fig. S6** (see Methods). A number of observations are given below, especially for those highly specific positions that have not been reported in the literature before.

**The transcriptional regulators motifs.** As expected, most of the positions in motif #1, associated with the light-independent transcriptional regulator sequences (**Fig. 4A** and yellow subtree in **Fig. S1**), are conserved in other subtrees as well, notably (6-4) PL and animal PR CRY, because of the proximity of these subtrees in the phylogenetic tree. Highly conserved positions in most, if not all, models are clearly identified as highly conserved also in the Pfam model (**Fig. S7**). However, four positions (L6, N38, L42 and K44 in **Fig. 4A**) appear to be specific to light-independent transcriptional regulators. Three residues belong to the same helix ( $\alpha 12$ ) and two of these positions (N38, K44) are known to belong to the interaction site with a partner and to the ubiquitination site (Hirano *et al.*, 2013; Schmalen *et al.*, 2014). The two remaining conserved positions (L6, L42), at the best of our knowledge, have not been identified before and open ways to new investigations. Similar considerations can be drawn on motif #2 associated with the light-independent transcriptional regulator sequences (**Fig. 4B**).

**The (6-4) photolyase motif.** The (6-4) photolyase motif generated by ProfileView highlights the highly specific amino acid L115 which interacts with DNA and belongs to the site of the damage DNA strand binding (**Fig. 4C**; see its specificity in **Fig. S5**). This position has not been discussed previously in the literature.

**Comparison of classes I and III CPD PL motifs.** By comparing the motif representing classes I and III CPD PL with those representing either class I CPD PL or class III CPD PL (see **Fig. S29**), we notice that there is almost no amino acid which is motif-specific among the three models. The strong closeness between motifs of class I and class III agrees with their shared function. We especially notice the conserved amino acids involved in CPD lesion binding sites such as W7, N71, M75, W114 and possibly F129 and Q134 (where numbers refer to the motif accounting for both classes I and III CPD PL; see "Class I & III CPD PL" motif and structure in **Fig. S29**), or those involved in FAD binding or FAD binding pocket such as R74, D102, D104, N108 (directly involved in the proton transfer to the FAD; see "Class I & III CPD PL" motif and structure in **Fig. S29**; see **Supplemental File**). This example demonstrates that the analysis

1237 of the different motifs at different nodes might be used to deduce common functions. However, it is possible  
1238 to extract some differences among the two motifs, where specific amino acids such as W60 (for class III  
1239 CPD PL) versus Y56 (for class I CPD PL) were suggested to make an alternative electron transfer pathway  
1240 possibly important in some specific condition (Scheerer *et al.*, 2015). Other interesting differences are W29,  
1241 D63 and T64 from class III CPD PL which have been identified as interacting with the MTHF in a specific  
1242 binding site of MTHF from class III CPD PL (Scheerer *et al.*, 2015).

1243 **Comparison of classes I and III CPD PL and plant PR CRY motifs.** Classes I and III CPD PL  
1244 and plant PR CRY are well-studied families in terms of function and molecular mechanisms, and present  
1245 numerous specific mutants leading to a loss of function. Remarkably, by crossing the functional charac-  
1246 terisation of specific residues in the collections of mutants described in the manually curated list with our  
1247 representative models of classes I and III CPD PL and plant PR CRY, we could validate 26 and 35 of the  
1248 ProfileView positions from the 33 and 47 positions in the list, respectively (see **Table S3**).

1249 **Two new conserved positions for classes I, II and III CPD PL.** Some promising new information  
1250 can be extracted by the comparative analysis. Indeed, despite many studies on these PL classes, we could  
1251 identify 2 specific amino acids (F27 and I55) with yet undefined function. When looking at their position  
1252 in the structure, these amino acids do not seem to be directly involved neither in DNA nor in FAD binding.  
1253 Nevertheless, they are highly specific suggesting their involvement in the CPD repair mechanism.

1254 **Comparison of classes I, II and III CPD PL and NCRY motifs.** By comparing the three CPD  
1255 PL motifs/models with the one from NCRY, we essentially remark the absence of the CPD binding site.  
1256 In NCRY motifs, four amino acids involved in the interaction of the CPD lesions by photolyase, E4, N71,  
1257 M75 and W114, are absent and respectively replaced by R4, F71, A75 and M114 suggesting the absence of  
1258 binding affinity for CPD substrate.

1259 **Comparison of classes I, II and III CPD PL and plant PR CRY motifs.** By comparing the three  
1260 CPD PL motifs/models with the one from plant PR CRY, we also remark the absence of the CPD binding  
1261 sites in plant PR CRY motif. Interestingly, at two specific positions of the CPD binding sites (M75, W114),  
1262 two specific amino acids (V74, Y114) are found in the motif of Plant PR CRY which have been involved in  
1263 the ATP binding site described up to now as specific for Plant PR CRY (Orth *et al.*, 2017; Brautigam *et al.*,  
1264 2004). Moreover, despite very conserved amino acids in class I CPD PL model such as D45, D49 or E54  
1265 (involved in the proton transfer to the FAD), the latter ones are present but not fully conserved in class III  
1266 CPD PL and are clearly absent in the plant PR CRY model. This observation suggests that these amino  
1267 acids might also be involved, directly or indirectly, in the CPD repair function, and that some variability is  
1268 not expected to disrupt the function.



1269 All these examples, experimentally validated by the genetic and functional analysis of selected mutations,  
1270 illustrate the strength of ProfileView representative models in extracting important amino acids information  
1271 from sequences that can be used to design tailored experiments for discovering new functional activities or  
1272 novel biological mechanisms involving the FAD binding domain.

1273

## SUPPLEMENTARY TABLES

| Protein Family                          | # seqs | seq length  | seq identity | seq similarity |
|-----------------------------------------|--------|-------------|--------------|----------------|
| Cryptochrome/<br>Photolyase (CPF)       | 397    | 586± 198aa  | 20.96        | 30.56          |
| WW domain                               | 349    | 30 ± 2aa    | 35.19        | 50.83          |
| Glycoside hydrolase<br>family 30 (GH30) | 1803   | 524 ± 235aa | 23.62        | 35.03          |
| HAD/ $\beta$ -PGM/<br>Phosphatase-like  | 391    | 261 ± 101aa | 25.47        | 37.79          |
| B12-binding<br>domain containing        | 273    | 549±83      | 28.33        | 40.95          |
| Methylthiotransferase                   | 400    | 463±65      | 29.58        | 46.64          |
| SPASM/twitch<br>domain containing       | 128    | 366±36      | 38.02        | 51.96          |

Table S1: **Characteristics of the sets of sequences considered for classification.** To be added to the list of features in Figure I: protein family name, lengths of the protein sequences, sequence identity, sequence similarity. Here, sequence length, identity and similarity are given for the entire sequence, not for the domain used to classify the protein sequences. Identities and similarities were computed using the `needle` command of the EMBOSS package (version 6.6.0) and took into account the full-length sequence, not just the domain portion. Note that the variability of sequence length is due to the fact that sequences might be portions of a protein in the family.

| Protein Family                          | Domain(s)                            | # seqs | domain length | # models in library | time for model construction | time for classification |
|-----------------------------------------|--------------------------------------|--------|---------------|---------------------|-----------------------------|-------------------------|
| Cryptochrome/<br>Photolyase (CPF)       | FAD                                  | 397    | 203 ± 26aa    | 3735                | 19h50                       | 15min                   |
| WW domain                               | WW                                   | 349    | 30 ± 2aa      | 3733                | 8h42                        | 4min                    |
| Glycoside hydrolase<br>family 30 (GH30) | Glyco-hydro-30 &<br>Glyco-hydro-30-2 | 1803   | 282 ± 85aa    | 1803                | 9h40                        | 30min                   |
| HAD/ $\beta$ -PGM/<br>Phosphatase-like  | HAD & HAD_2                          | 391    | 165 ± 37aa    | 4075                | 17h02                       | 3min                    |
| B12-binding<br>domain containing        | B12-binding &<br>B12-binding_2       | 273    | 103±22        | 3504                | 18h49                       | 1min                    |
| Methylthiotransferase                   | RadicalSAM                           | 400    | 159±25        | 4501                | 28h53                       | 1min                    |
| SPASM/twitch<br>domain containing       | SPASM                                | 29     | 68±7          | 2663                | 12h57                       | 1min                    |
|                                         | Radical_SAM                          | 128    | 159±25        | 4501                | 28h53                       | 1min                    |

Table S2: **Computational time and other features.** To be added to the list of features in Figure I: protein family name, domain(s) used for classification, number of sequences before filtering, domain length, number of models constructed for ProfileView analysis, time for model construction and time for classification.

| CPF functional class                         | # Experimentally characterized seqs | # Sequences in the ProfileView subtrees |    | # Experimental positions | # Positions in the ProfileView motif |
|----------------------------------------------|-------------------------------------|-----------------------------------------|----|--------------------------|--------------------------------------|
|                                              |                                     | TP                                      | FN |                          |                                      |
| Animal PR CRY                                | 4                                   | 4                                       | 0  | 15                       | 13                                   |
| (6-4) PL                                     | 12                                  | 11                                      | 1  | 19                       | 16                                   |
| Transcriptional Regulator (motifs #1 and #2) | 18                                  | 18                                      | 0  | 16                       | 7                                    |
|                                              |                                     |                                         |    | 16                       | 5                                    |
| Plant PR CRY                                 | 8                                   | 8                                       | 0  | 47                       | 35                                   |
| Class I & III CPD PL                         | 15                                  | 15                                      | 0  | 33                       | 26                                   |
| Class II CPD PL                              | 5                                   | 5                                       | 0  | 22                       | 18                                   |
| CRY Pro                                      | 2                                   | 2                                       | 0  | 11                       | 10                                   |
| CRY DASH                                     | 8                                   | 8                                       | 0  | 12                       | 9                                    |
| Overall                                      | 72                                  | 71                                      | 1  |                          |                                      |

**Table S3: Validation of ProfileView on functionally characterised CPF sequences and on functionally characterised positions in CPF sequences.** For each representative motif of a CPF functional class, we report the number of CPF sequences with a characterised function, the number of sequences belonging to the associated ProfileView subtree, the number of experimentally characterised positions listed in **Supplemental file** “CPF\_mutants\_used\_for\_validation.xlsx” and the number of these positions that belong to the associated motif. For transcriptional regulators, we distinguish the two ProfileView motifs (#1 and #2 in the text) and report the corresponding characterized positions in two different lines of the table. The total number of experimentally characterised sequences to be classified is reported in the line “Overall”. The sequence identified as FN corresponds to the one left white in the ProfileView tree of Fig S1.

| Correspondance among groups of WW sequences |                    |             |                      |                | Experimental characterisation |      |      |       | Computational classification |         |
|---------------------------------------------|--------------------|-------------|----------------------|----------------|-------------------------------|------|------|-------|------------------------------|---------|
| Ingham groups                               | Russ classes       | Otte groups | ProfileView subtrees | Tubiana groups | Ingham                        | Russ | Otte | Total | ProfileView                  | Tubiana |
| A                                           | I                  | Y           | $T_1$                | I              | 3                             | 18   | 20   | 35    | 35                           | 32(34)  |
| B                                           | II+III+<br>Im+I/IV | L           | $T_2$                | II/<br>III     | 3                             | 3    | 2    | 5     | 5                            | 15(16)  |
|                                             |                    | Ra          | $T_3$                |                | 1                             | 1    | 4    | 4     |                              |         |
|                                             |                    | Rb          | $T_4$                | 2              | 2                             | 2    | 3    | 3     |                              |         |
|                                             |                    | Poly-P      | $T_5$                | 1              | 3                             | 2    | 5    | 5     |                              |         |
| C                                           | IV                 | posS/posT   | $T_6&T_7$            | IV             | 1                             | 1    | 2    | 2     | 2                            | 2(2)    |
| Overall                                     |                    |             |                      |                | 54                            |      |      |       | 54                           | 49(52)  |

**Table S4: Validation of ProfileView on 54 functionally characterised sequences of the WW domain family.** ProfileView classification is based on 7 distinct subtrees corresponding to the six Otte’s groups (subtrees  $T_6$  and  $T_7$  are associated to posS/posT-group in Otte), the three Ingham’s groups, and the three Russ’s classes, as indicated. This correspondance is reported in the three outer circles of the ProfileView tree in **Fig. S11**, where the names of the ProfileView subtrees are also indicated. The total number of functionally characterised sequences belonging to classes or groups in the three experimental studies is reported together with the total number of sequences characterised by the three experiments for each group (central columns). Note that some of the sequences have been experimentally characterised by more than one experiment. The right-most columns report ProfileView and Tubiana’s classifications. For Tubiana, 52 sequences among the 54 ones have been considered for classification as reported in parenthesis. Overall, Tubiana wrongly classifies 3 sequences.

| CAZy subfamilies | # of CAZy classified seq. | # of ProfileView classified seq. |    |
|------------------|---------------------------|----------------------------------|----|
|                  |                           | TP                               | FN |
| GH30-1           | 151                       | 151                              | 0  |
| GH30-2           | 48                        | 48                               | 0  |
| GH30-3           | 244                       | 243                              | 1  |
| GH30-4           | 60                        | 60                               | 0  |
| GH30-5           | 83                        | 83                               | 0  |
| GH30-6           | 4                         | 4                                | 0  |
| GH30-7           | 29                        | 29                               | 0  |
| GH30-8           | 63                        | 63                               | 0  |
| GH30-9           | 13                        | 13                               | 0  |
| Overall          | 695                       | 694                              | 1  |

Table S5: **CAZy classification versus ProfileView classification of the 695 sequences in the GH30 family.** The GH30 sequences are counted as TP whenever they make the ProfileView subtrees for the corresponding CAZy subfamily and FN whenever they wrongly appear in a subtree of another subfamily. See **Fig. S15**.

| EC numbers in CAZy functional annotation | # of CAZy characterised seq. | # of ProfileView classified seq. |    |
|------------------------------------------|------------------------------|----------------------------------|----|
|                                          |                              | TP                               | FN |
| 3.2.1.8                                  | 10                           | 10                               | 0  |
| 3.2.1.8+3.2.1.136                        | 2                            | 2                                | 0  |
| 3.2.1.136                                | 2                            | 2                                | 0  |
| 3.2.1.75                                 | 7                            | 7                                | 0  |
| 3.2.1.21+3.2.1.37                        | 1                            | 1                                | 0  |
| 3.2.1.*                                  | 3                            | 3                                | 0  |
| 3.2.1.45                                 | 2                            | 2                                | 0  |
| 3.2.1.37                                 | 2                            | 2                                | 0  |
| 3.2.1.31                                 | 1                            | 1                                | 0  |
| 3.2.1.38                                 | 2                            | 2                                | 0  |
| 3.2.1.164                                | 2                            | 2                                | 0  |
| Overall                                  | 34                           | 34                               | 0  |

Table S6: **CAZy characterisation based on EC numbers versus ProfileView classification of the 34 sequences in the GH30 family.** The GH30 sequences are counted as TP whenever they belong to the ProfileView subtrees corresponding to the CAZy subfamilies GH30-1,..., GH30-9 (GH30-1: 3.2.1.45 and 3.2.1.21+3.2.1.37; GH30-2: 3.2.1.37; GH30-3: 3.2.1.75; GH30-4: 3.2.1.38; GH30-5: 3.2.1.164; GH30-6:3.2.1.136; GH30-7: 3.2.1.\*; GH30-8: 3.2.1.8, 3.2.1.136, 3.2.1.8+3.2.1.136; GH30-9: 3.2.1.31) and FN whenever they wrongly appear in a subtree of another class. We define FN only for classes of more than 3 sequences. See **Fig. S15**.

| HAD functional classes           | # of SFLD characterised seq. | # of ProfileView classified seq. |    |
|----------------------------------|------------------------------|----------------------------------|----|
|                                  |                              | TP                               | FN |
| $\beta$ -phosphoglucomutase      | 43                           | 43                               | 0  |
| phosphonoacetaldehyde hydrolase  | 36                           | 36                               | 0  |
| Phosphoglycolate phosphatase     | 59                           | 59                               | 0  |
| 2-haloacid dehalogenase          | 113                          | 113                              | 0  |
| 2-deoxyglucose-6-phosphatase     | 6                            | 6                                | 0  |
| glycerol-3-phosphate phosphatase | 2                            | 2                                | 0  |
| Overall                          | 259                          | 259                              | 0  |

Table S7: **SFLD characterisation versus ProfileView classification of the 259 HAD/ $\beta$ -PGM/Phosphatase-like sequences of the Haloacid Dehydrogenase family.** The sequences are counted as TP whenever they make the ProfileView subtrees for the functional class and FN whenever they wrongly appear in a subtree of another class. We define FN only for classes of more than 3 sequences. The SFLD classes correspond to distinct ProfileView subtrees, hence the FN column contains only 0s. See **Fig. S16**.

| B12-binding domain containing functional classes                                        | # of SFLD characterised seq. | # of ProfileView classified seq. |    |
|-----------------------------------------------------------------------------------------|------------------------------|----------------------------------|----|
|                                                                                         |                              | TP                               | FN |
| anaerobic magnesium-protoporphyrin-IX monomethyl ester cyclase Q bacteriocin maturation | 81                           | 80                               | 1  |
| bacteriocin maturation                                                                  | 78                           | 78                               | 0  |
| hopanetetrol cyclitol ether synthase                                                    | 93                           | 89                               | 4  |
| ladderane biosynthesis                                                                  | 1                            | 1                                | 0  |
| valine cyclopropanase                                                                   | 1                            | 1                                | 0  |
| OxsB-like                                                                               | 1                            | 1                                | 0  |
| paromamine deoxygenase                                                                  | 3                            | 3                                | 0  |
| Overall                                                                                 | 258                          | 253                              | 5  |

Table S8: **SFLD characterisation versus ProfileView classification of the 258 B12-binding domain containing sequences of the Radical SAM family.** The sequences are counted as TP whenever they make the ProfileView subtrees for the functional class and FN whenever they wrongly appear in a subtree of another class. We define FN only for classes of more than 3 sequences. See **Fig. S17**.

| Methyltransferase functional classes                        | # of SFLD characterised seq. | # of ProfileView classified seq. |    |
|-------------------------------------------------------------|------------------------------|----------------------------------|----|
|                                                             |                              | TP                               | FN |
| (dimethylallyl)adenosine tRNA methyltransferase (MiaB-like) | 99                           | 94                               | 5  |
| ribosomal protein S12 methyltransferase (RimO-like)         | 98                           | 91                               | 7  |
| threonylcarbamoyl-adenosine tRNA methyltransferase          | 99                           | 99                               | 0  |
| CDKSRAP1                                                    | 97                           | 96                               | 1  |
| Overall                                                     | 393                          | 380                              | 13 |

Table S9: **SFLD characterisation versus ProfileView classification of the 393 Methyltransferase sequences of the Radical SAM family.** The sequences are counted as TP whenever they make the ProfileView subtrees for the functional class and FN whenever they wrongly appear in a subtree of another class. We define FN only for classes of more than 3 sequences. See **Fig. S18**.

| SPASM/twitch domain containing functional classes   | # of SFLD characterised seq. | # of ProfileView classified seq. |    |
|-----------------------------------------------------|------------------------------|----------------------------------|----|
|                                                     |                              | TP                               | FN |
| coenzyme PQQ synthesis protein E (PqqE-like)        | 1                            | 1                                | 0  |
| Kxxx.W cyclic peptide maturase (StrB-like)          | 14                           | 14                               | 0  |
| adenosyl-hopene transferase                         | 8                            | 8                                | 0  |
| UDP-N-acetyl-tunicamine-uracil synthase (TunB-like) | 4                            | 4                                | 0  |
| cytosylglucuronate decarboxylase                    | 0                            | 0                                | 0  |
| neomycin C-like epimerase                           | 1                            | 1                                | 0  |
| pcfB-like                                           | 1                            | 1                                | 0  |
| Overall                                             | 29                           | 29                               | 0  |

Table S10: **SFLD characterisation versus ProfileView classification of the 29 SPASM/twitch domain containing subgroup of Radical SAM sequences based on the SPASM domain.** The sequences are counted as TP whenever they make the ProfileView subtrees for the functional class and FN whenever they wrongly appear in a subtree of another class. We define FN only for classes of more than 3 sequences. See **Fig. S19**.

| SPASM/twitch domain containing functional classes   | # of SFLD characterised seq. | # of ProfileView classified seq. |    |
|-----------------------------------------------------|------------------------------|----------------------------------|----|
|                                                     |                              | TP                               | FN |
| coenzyme PQQ synthesis protein E (PqqE-like)        | 1                            | 1                                | 0  |
| Kxxx.W cyclic peptide maturase (StrB-like)          | 14                           | 14                               | 0  |
| adenosyl-hopene transferase                         | 89                           | 88                               | 1  |
| UDP-N-acetyl-tunicamine-uracil synthase (TunB-like) | 4                            | 4                                | 0  |
| cytosylglucuronate decarboxylase                    | 2                            | 2                                | 0  |
| neomycin C-like epimerase                           | 4                            | 4                                | 0  |
| pcfB-like                                           | 1                            | 1                                | 0  |
| Overall                                             | 115                          | 114                              | 1  |

Table S11: **SFLD characterisation versus ProfileView classification of the 115 SPASM/twitch domain containing subgroup of Radical SAM sequences based on the Radical SAM domain.** The sequences are counted as TP whenever they make the ProfileView subtrees for the functional class and FN whenever they wrongly appear in a subtree of another class. We define FN only for classes of more than 3 sequences. See **Fig. S20**.

1274

## SUPPLEMENTARY FIGURES



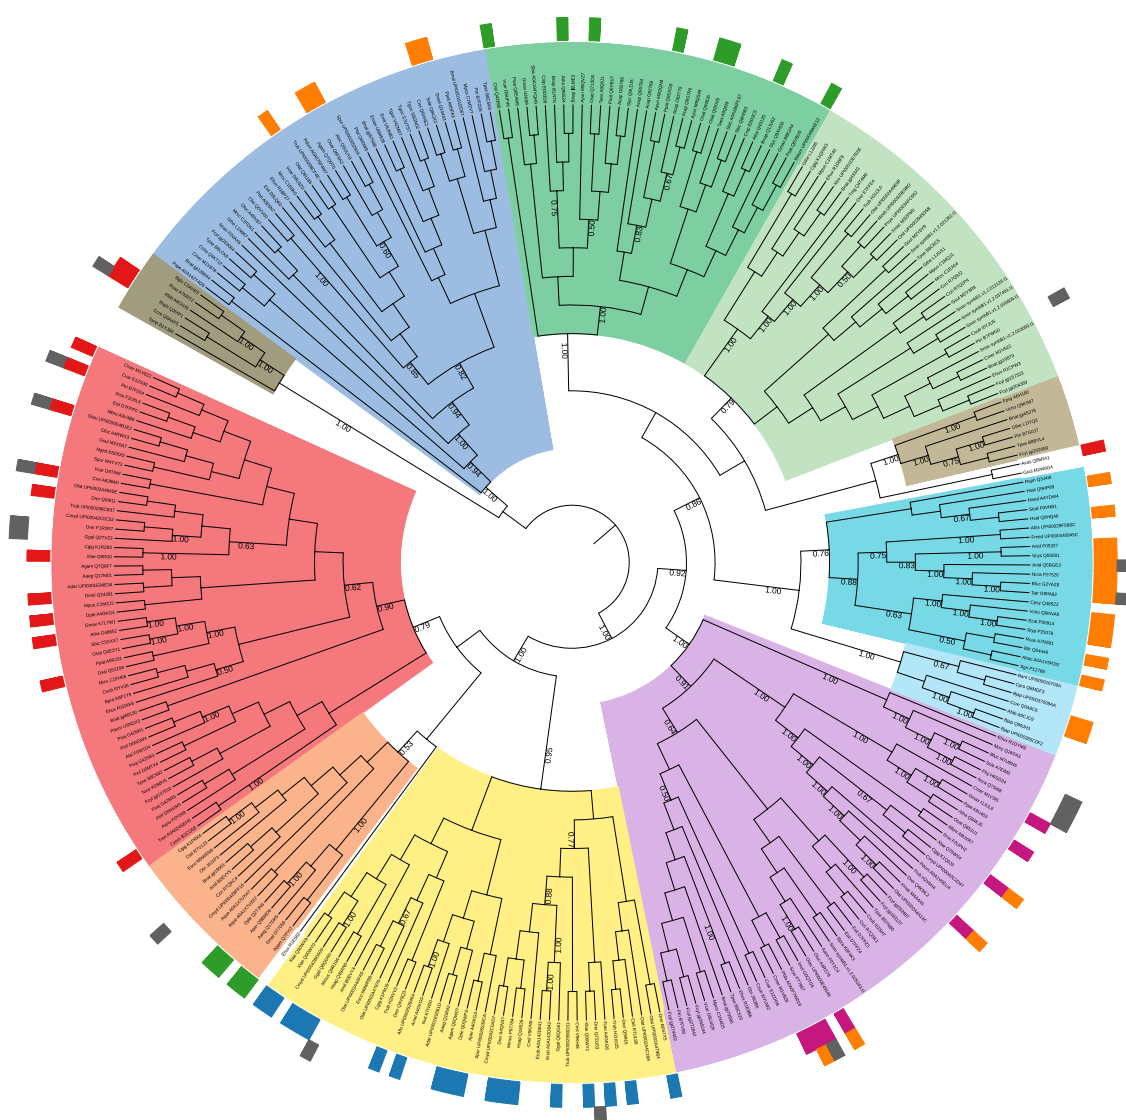

### Cryptochrome/Photolyase Family

|                                                                |                                                         |                                                                   |                                                                        |
|----------------------------------------------------------------|---------------------------------------------------------|-------------------------------------------------------------------|------------------------------------------------------------------------|
| <span style="color: red;">■</span> (6-4) photolyase            | <span style="color: yellow;">■</span> Trans. regulators | <span style="color: cyan;">■</span> Class I CPD photolyase        | <span style="color: lightgreen;">■</span> Plant-like photoreceptor CRY |
| <span style="color: orange;">■</span> Animal photoreceptor CRY | <span style="color: purple;">■</span> CRY DASH          | <span style="color: lightblue;">■</span> Class III CPD photolyase | <span style="color: green;">■</span> Plant photoreceptor CRY           |
| <span style="color: brown;">■</span> NCRY                      | <span style="color: grey;">■</span> CRY Pro             | <span style="color: blue;">■</span> Class II CPD photolyase       | <span style="color: white;">■</span> N/A                               |

### Function

|                                               |                                                   |                                                      |                                                      |                                                    |
|-----------------------------------------------|---------------------------------------------------|------------------------------------------------------|------------------------------------------------------|----------------------------------------------------|
| <span style="color: blue;">●</span> Circadian | <span style="color: red;">●</span> 6-4 photolyase | <span style="color: orange;">●</span> CPD photolyase | <span style="color: pink;">●</span> ssDNA photolyase | <span style="color: green;">●</span> Photoreceptor |
| <span style="color: grey;">●</span> Signaling |                                                   |                                                      |                                                      |                                                    |

Figure S1: ProfileView tree of 307 FAD-binding domain sequences built from FAD-binding domain (PF03441) models from Pfam v31 using a hierarchical agglomerative clustering strategy. Colors of subtrees are identified by representative models and correspond to known CPF classes, with the exception of the NCRY subtree. External coloured labels define known functions for the sequences. Some of the 307 sequences are known to hold multiple functions and are labelled by two colors. The function “signalling” (grey) refers to signalling processes of different nature (photoreceptor, transcription, unknown). Numbers on the internal nodes correspond to the percentage of sequences in the corresponding subtree that are separated from the remaining sequences in the tree by the best representative model occurring in the model library.

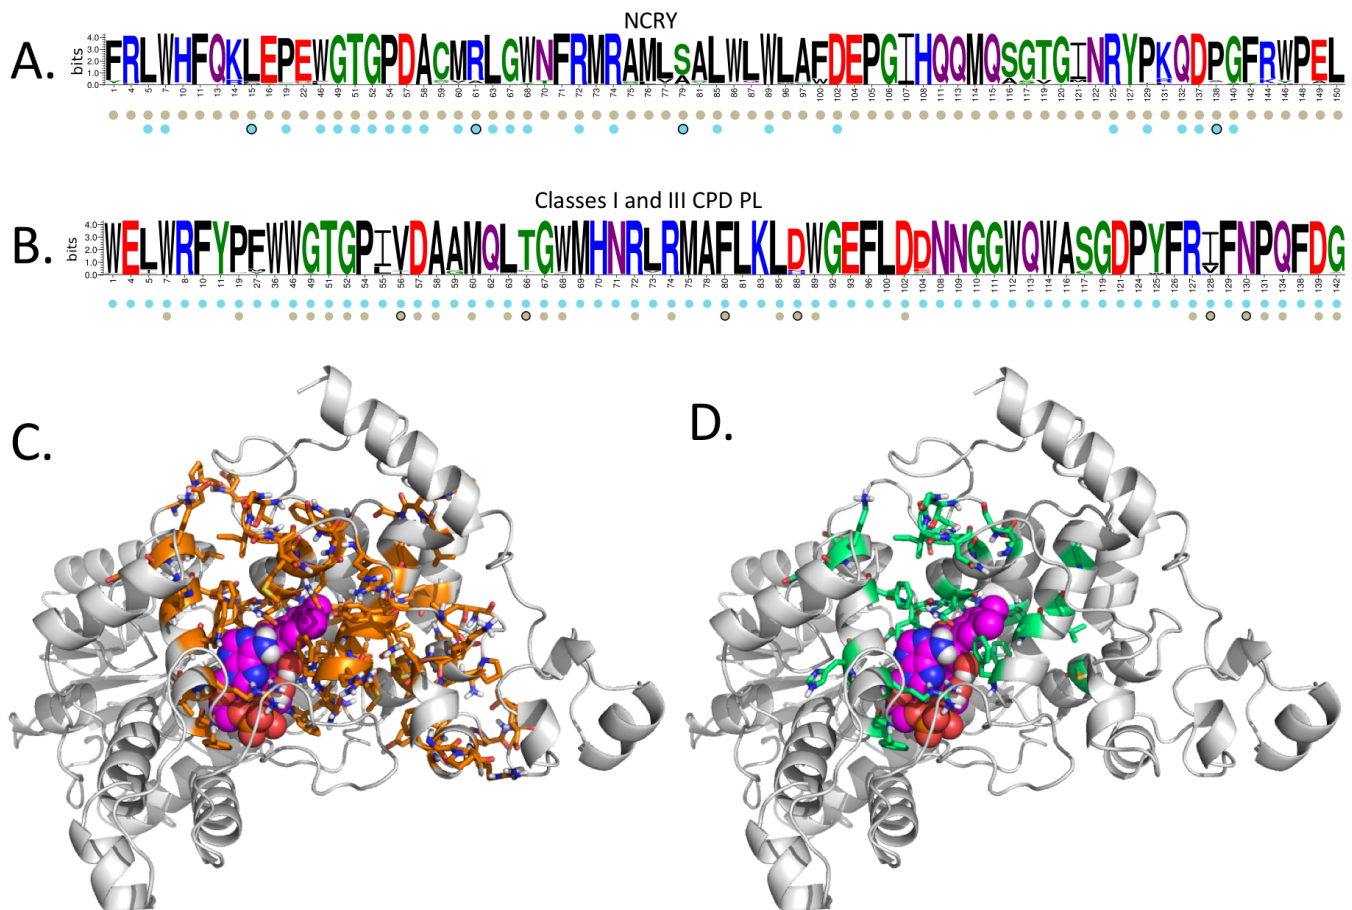

Figure S2: Motif for the NCRY sequences of the CPF family and their structural modelling. **A.** Motif resulting from the representative model of NCRY sequences (see Fig. 3). The positions of this model that are also conserved in the model representative of the class I CPD PL sequences in B are indicated with cyan bullets, below the motif. **B.** Motif resulting from the representative model of classes I & III CPD PL sequences (see Fig. 3). The positions of this model that are also conserved in the model representative of the NCRY sequences in A are indicated with beige bullets, below the motif. **C.** Homology model of the FAD *P<sup>t</sup>NCRY* structure where all conserved residues in the NCRY motif (all positions making the motif in A) are highlighted in orange. Compare with the NCRY specific residues highlighted on the same homology model in D. **D.** All conserved residues in the NCRY motif that are NCRY specific (all positions in the motif in A marked with a beige bullet but not with a cyan one) are highlighted in green. Compare with C.

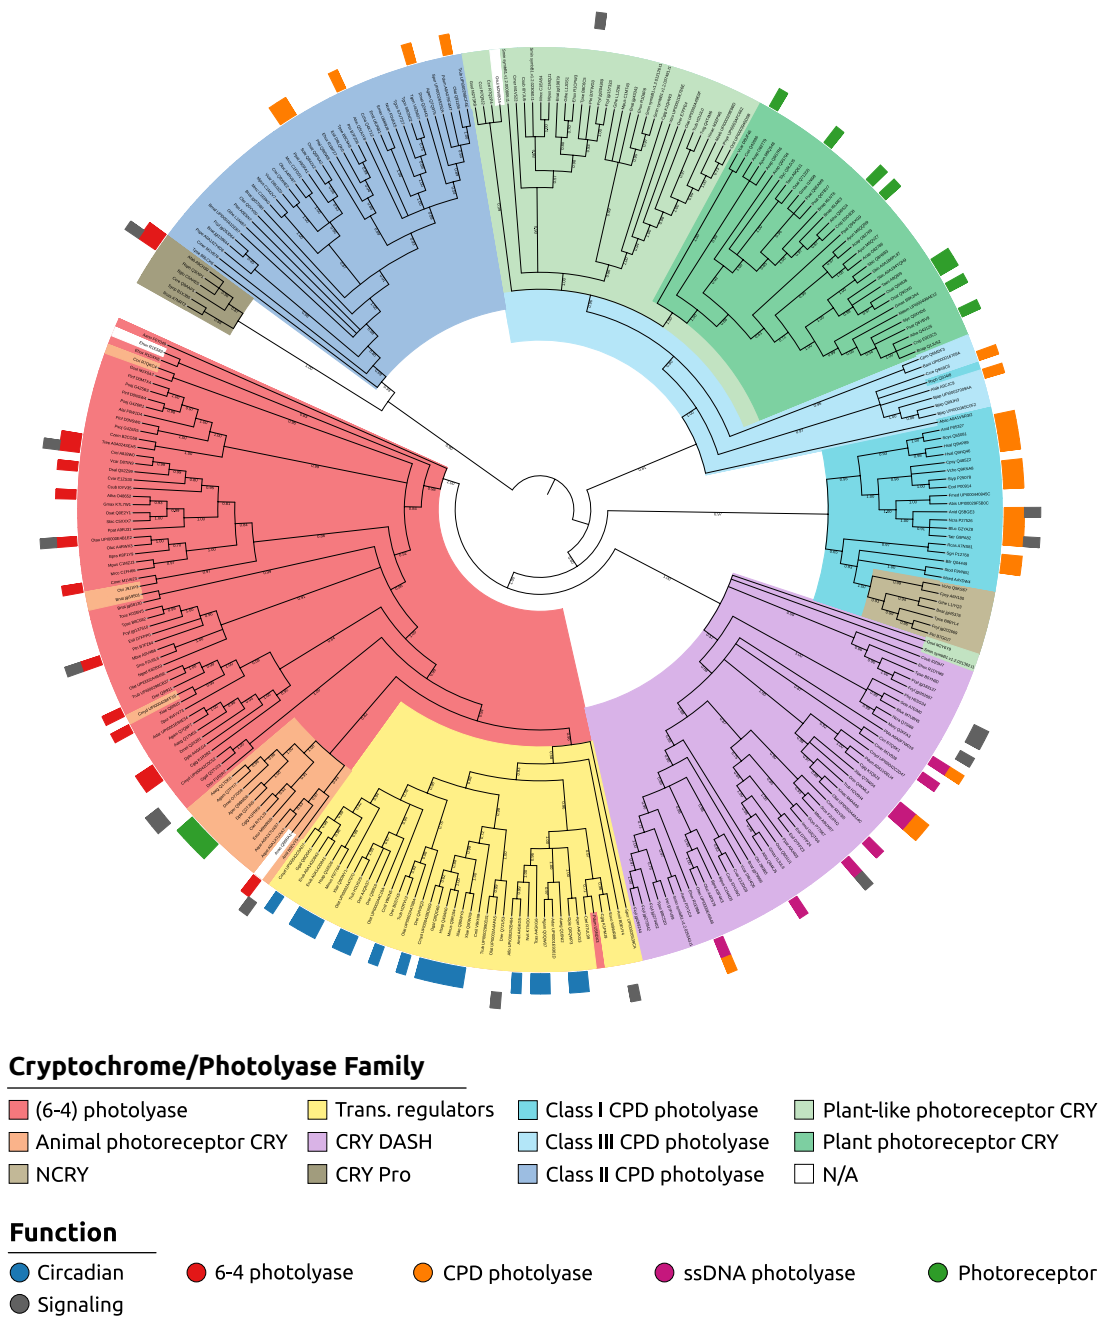

Figure S3: **Phylogenetic tree constructed from 307 CPF sequences.** Each sequence in the phylogenetic tree is coloured as in the ProfileView tree. Colors of internal subtrees are induced by sequence coloring. External labels report known functions for the sequences (see legend of **Fig. S1**). Numbers on the branches are bootstrap values.

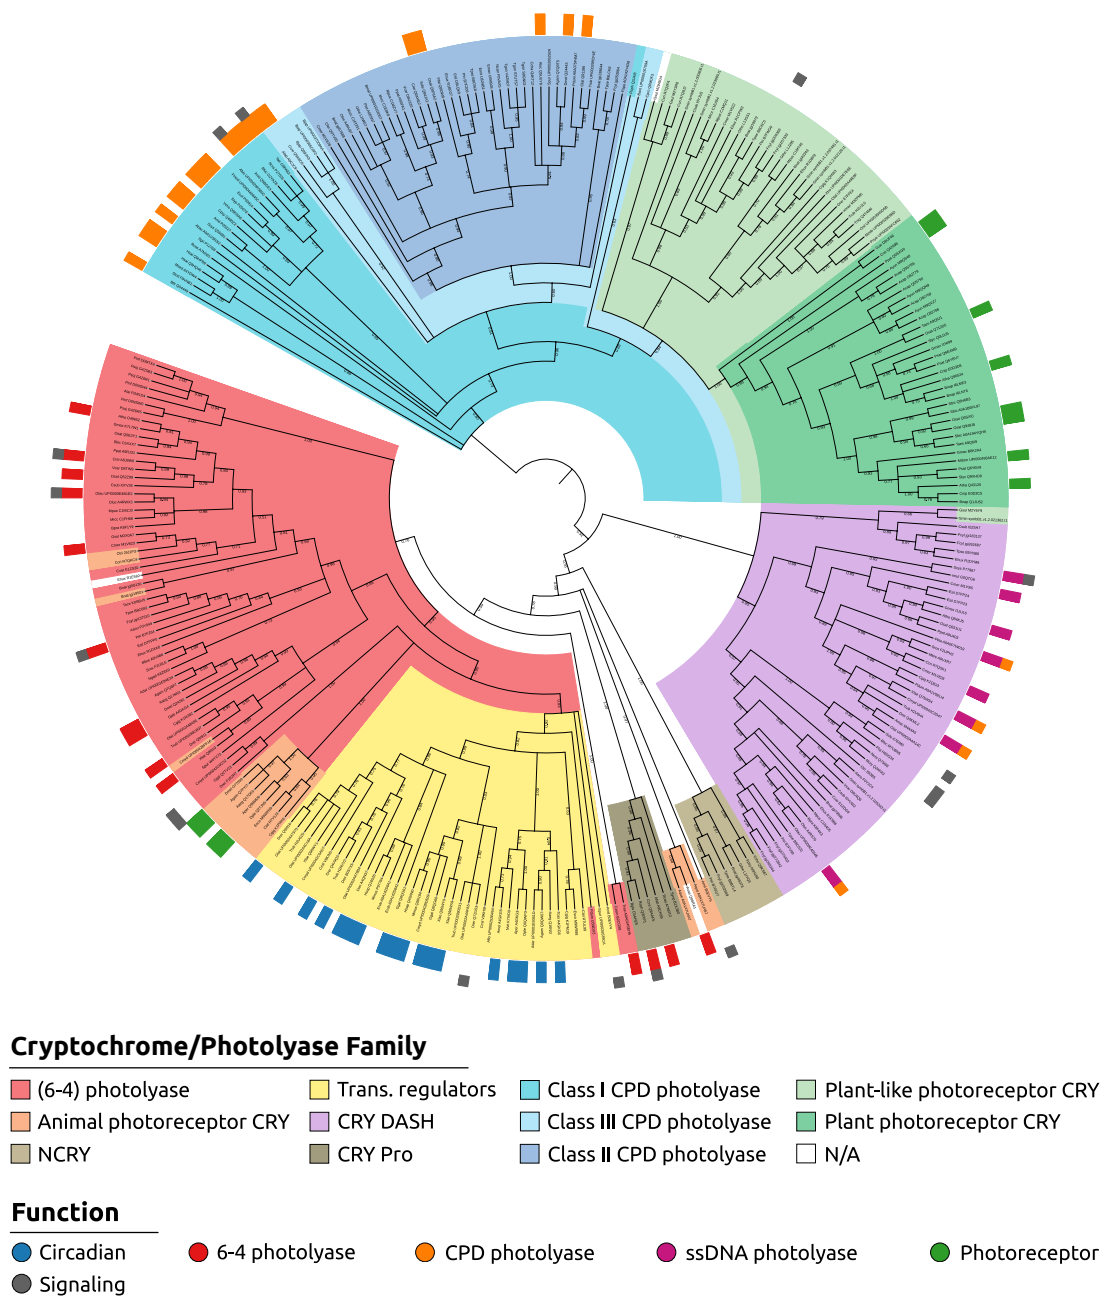

Figure S4: **Phylogenetic tree constructed from 307 FAD-binding domain sequences.** Each sequence in the phylogenetic tree is coloured as in the ProfileView tree. Colors of internal subtrees are induced by sequence coloring. External labels report known functions for the sequences (see legend of **Fig. S1**). Numbers on the branches are bootstrap values.

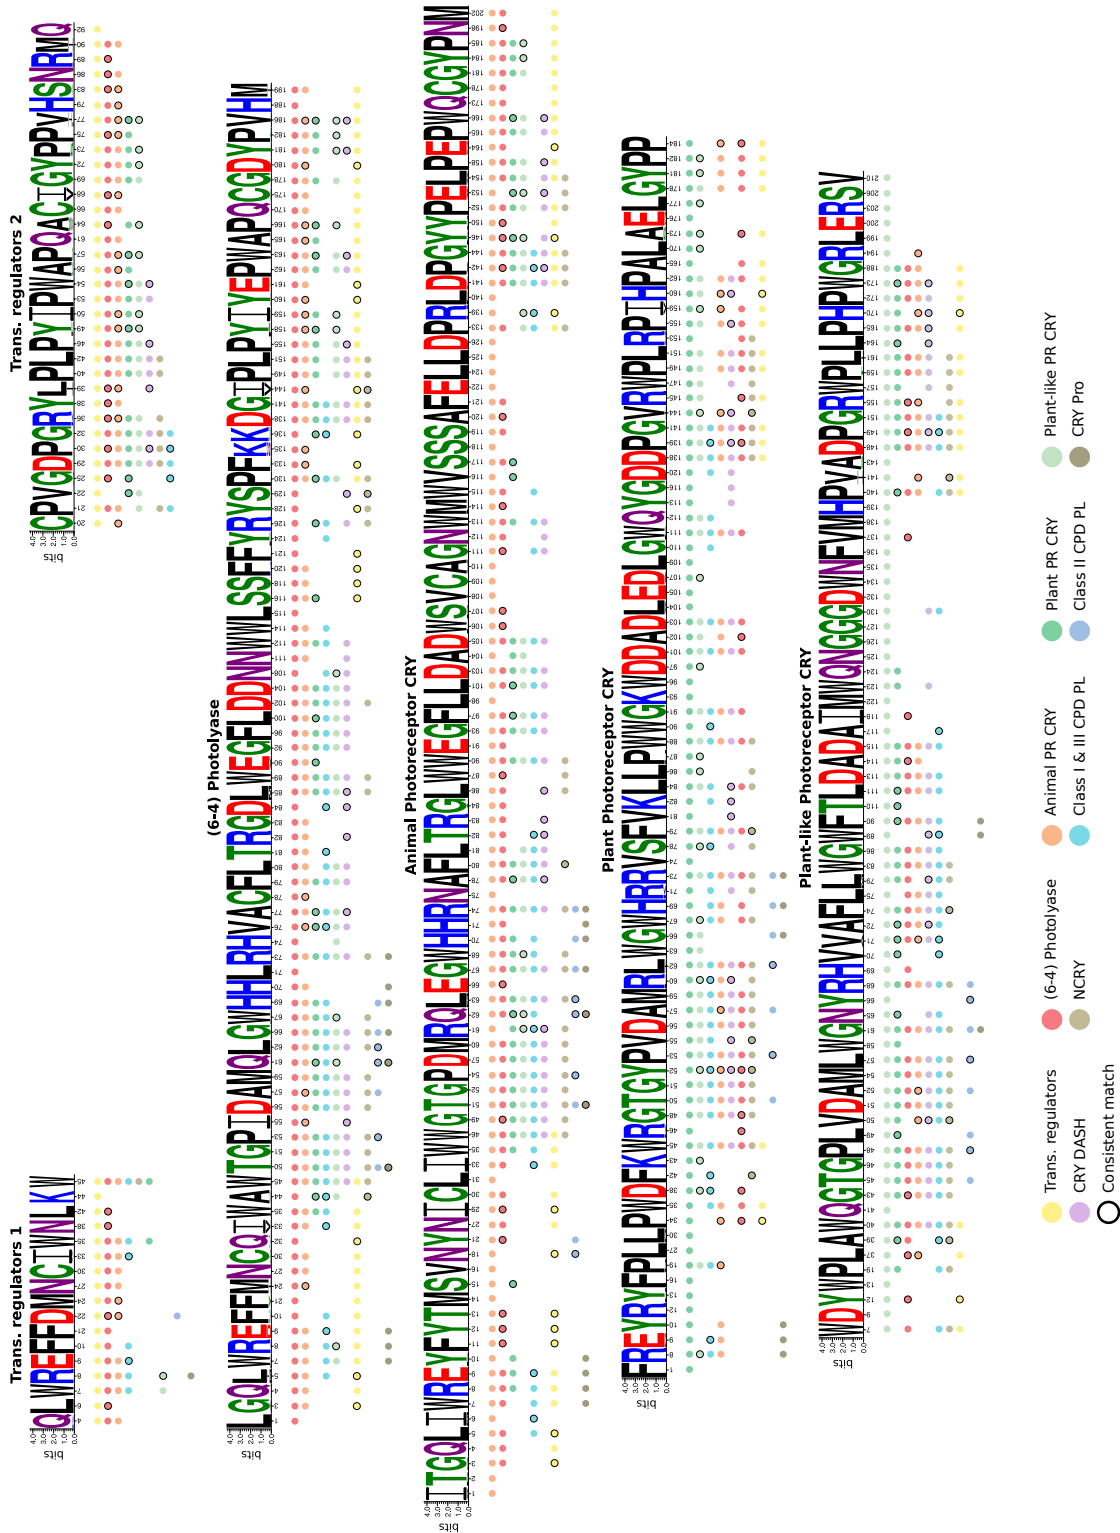

Figure S5: Eleven motifs for 10 subtrees in the ProfileView tree of CPF. Each motif for a class is represented by the most conserved positions in the corresponding representative model, that is positions showing > 60% frequency in the associated alignment (see Methods). Below each position, the coloured dots indicate that the position is well-conserved in other motifs (after their alignment; see Methods). Circled dots indicate that the position in the motif is not conserved as much in another motif (see Methods). The possible asymmetric distribution of color dots or an absence of dots between comparable positions in motifs is explained in Methods. Specific positions in a motif have no additional dot. The transcriptional regulators' subtree, represented by two distinct representative models, is provided with two independent motifs. For each motif, coloured dots are ordered, from top to bottom, depending on the best E-values given by hhblits to the pairwise alignments.

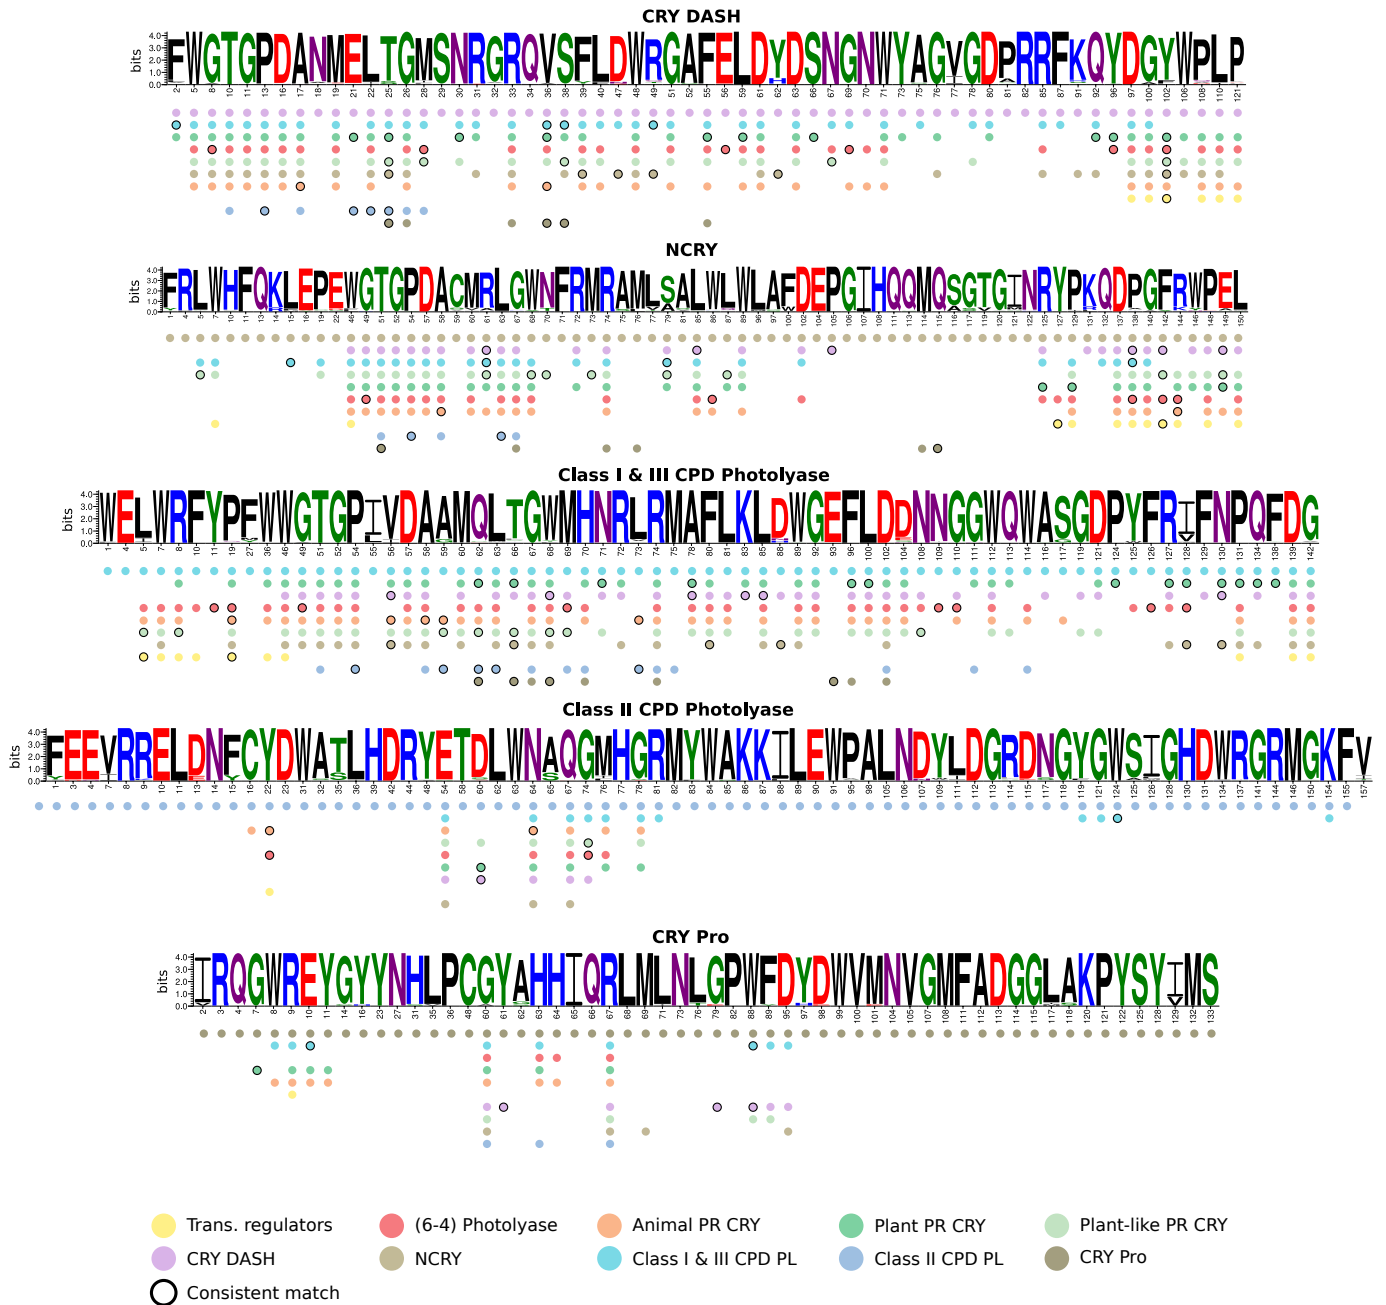

Figure S6: Eleven motifs for 10 subtrees in the ProfileView tree of CPF (continued). See legend in Fig. S5.

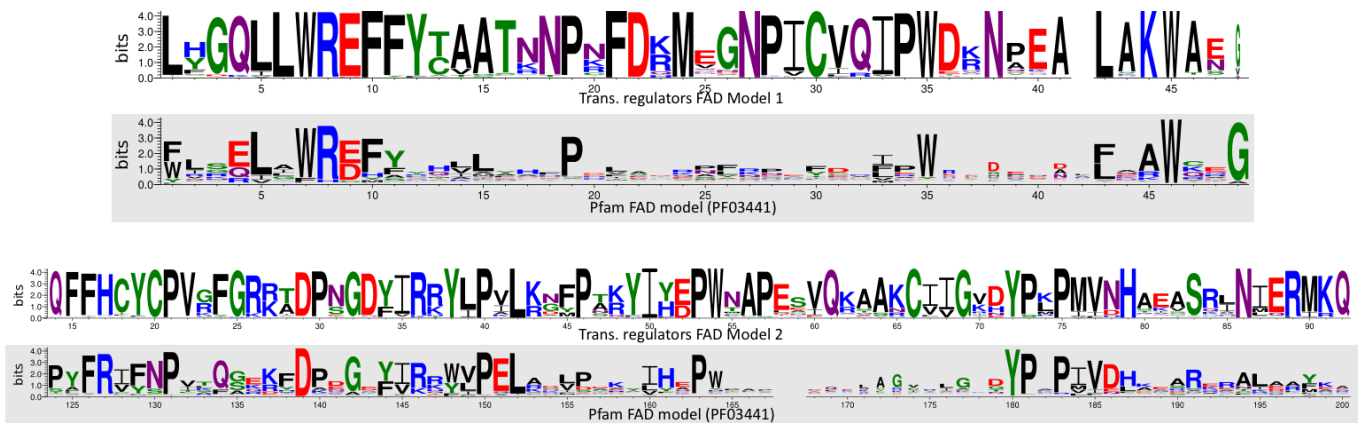

Figure S7: Comparison between trans. regulators models and Pfam models for the CPF family. Alignment of the two full models, corresponding to the trans. regulators motif 1 in A (top) and the trans. regulators model 2 in B (bottom), on two distinct regions of the Pfam FAD model PF03441 (grey background). The regions do not overlap.

|              |     |                                                       |     |
|--------------|-----|-------------------------------------------------------|-----|
| U5NDX3_PLADU | 1   | MWQQIFSPNTVVEG-----KNIVHWFVRKGLRLHDNPALLEALKGAST      | 43  |
| R7UL99_CAPTE | 1   | -----MCEENAQIPGEPSSKKKKKNVLYWFRRLRLHDNAALVEVLKEADT    | 45  |
| U5NDX3_PLADU | 44  | WRCIYILDWPWFAGSSQAGISKWRFLLQCLEDLDASLRKLSRFLVVRGQP    | 93  |
| R7UL99_CAPTE | 46  | FRCIFILDWPWFAGASQVGINKWRFLLQSLLEDLSRLRKLNSRFLVIRGQP   | 95  |
| U5NDX3_PLADU | 94  | ADVLPRLFVEWSVKVLSFEEDPEPFGRERDAAICALAQEAGVDVNIRTSH    | 143 |
| R7UL99_CAPTE | 96  | TDIFPKLFQKWDISALAFEEDPEPFGKERDSAVCTKSQDAGIEVVIKTSH    | 145 |
| U5NDX3_PLADU | 144 | TLFAPQKVIERNQGVPPTYKRFQSIAGMEVPCQPEPNCPTTEVMNCRS      | 193 |
| R7UL99_CAPTE | 146 | TLFNLQKILDKNSSGVPPLTYKRFQRI LARMDPPRPVEAVTSVTIGSVVT   | 195 |
| U5NDX3_PLADU | 194 | PTNDHDDETYGVPTEELGFDTDGLRPAVWKGGETEALSRLDRHFERRKAW    | 243 |
| R7UL99_CAPTE | 196 | PINSDHDDQYGVPTLEDLGFDTDNLEAAVWKGGETEALSRLDRHLERRKAW   | 245 |
| U5NDX3_PLADU | 244 | VASFEKPKMTPNSLLASPTGLSPYFRFGCLSPRLFYWRLTELYRKVKKRQ    | 293 |
| R7UL99_CAPTE | 246 | VASFEKPKMTPQSLMASPTGLSPYLRFGCLSTRLFYWRLTDLYRKVKKRT    | 295 |
| U5NDX3_PLADU | 294 | DPPLSLHGQLLWREFFYVSTNNPKFDRMQSNPICVQIPWDKNPEALAKW     | 343 |
| R7UL99_CAPTE | 296 | DMPLSLHGQLLWREFFYTAATNNPKFDRMVGNPICVQVPWDKNPEALAKW    | 345 |
| U5NDX3_PLADU | 344 | AEAKTGLPWIDAIMTQLRQEGWIHHLARHAVACFLTRGDLWISWEEGMKV    | 393 |
| R7UL99_CAPTE | 346 | AECKTGFPPWIDAIMTQLRQEGWIHHLARHSVACFLTRGDLWISWEEGMKV   | 395 |
| U5NDX3_PLADU | 394 | FDEMLLDADWSTNAGSWMWLSCSSFFQQFFHITYCPVNFGRKRTDPNGDYIR  | 443 |
| R7UL99_CAPTE | 396 | FEEQLLDADWSINAGMWLWLSLSCSSFFQQFFHITYCPASFGRKADPTGDYIR | 445 |
| U5NDX3_PLADU | 444 | RYPVVLKGFPARYIFEPWTAPESVQRAAHCIIGKDYPLPMVNHQEASRIN    | 493 |
| R7UL99_CAPTE | 446 | KYLPVVKAFPTKYIYEPWTAPMEIQVAVRCVIGVDYPLPIVNHAEISQIN    | 495 |
| U5NDX3_PLADU | 494 | MERMMQVYQQLSPRAGHLGRMLRGRSNLAD-----                   | 524 |
| R7UL99_CAPTE | 496 | MERMKQIYHQISLKSGLSKYVRRRQRHMEMTEGVSRRHVFMYPGNPQN      | 545 |
| U5NDX3_PLADU | 525 | -PRLKTDKFGIPMTGNKPSKALVPRRLDTQYLSATATTAVTQSSSDSETP    | 573 |
| R7UL99_CAPTE | 546 | IPNLSSAR-GIPLQAAKQMSLQOSK-----RNHSSSESQDRKVV          | 585 |
| U5NDX3_PLADU | 574 | TNSSQNLRNK                                            | 585 |
| R7UL99_CAPTE | 586 | RGDSRHMMHNQ                                           | 597 |

Figure S8: Sequence alignment for the pair of CPF sequences U5NDX3 and R7UL99. The alignment has been realised at [https://www.ebi.ac.uk/Tools/psa/emboss\\_needle/](https://www.ebi.ac.uk/Tools/psa/emboss_needle/). The sequence U5NDX3 has been classified by ProfileView as a “(6-4) PL” and the sequence R7UL99 as a “transcriptional regulator” sequence. In green: positions matched by the conserved motif, associated with the representative model of the “(6-4) PL” subgroup of CPF, and displaying the same amino acid of the motif. In blue: as in green but where the amino acid is different in the motif.



```

Q6MDF3_PARUW_270-470      YLRQIGWREFAHLLLYHFP-ETPQKPLRSQFNSFSWKNQKQNLKAWQKGTGYP IIDAGM
D8UF46_VOLCA_295-494      FLQQVGYREYSRYLSFHF P-FIHERSLLRHLRAC PWRIDQHAFKAWRQGQGTGYP IVDAA M
Q485Z2_COLP3_276-470      WLNEI IWREFYRHLLFHEQRLCKHQCYKENYQEMLWHNDAALFDAWCQGR TGYPLVDAAM
:*.: : ** : ** : * . : . : * : * : . ** : ** : ** : ** : **

Q6MDF3_PARUW_270-470      RQLWKIGWMHNRVRLIVGSFLVKDLMIHWIEGAKWFDWTLVDADLANNTMGWQW IAGCGA
D8UF46_VOLCA_295-494      RQLWSSGWCHNRARVVAASFLVKNLLLPWQWGLKHYWDAQIDADLECDALGWQYVSGGMS
Q485Z2_COLP3_276-470      RQLNQ TGMHNR LRMVVASFLTKHLLIDWRLGEKYFMQHLIDGDLASNNGGWAASTGC
** * . ** ** * : : . ** . * : : * * * : : : * . * * : ** : : .

Q6MDF3_PARUW_270-470      DAAPYFRI FNPITQGEKFDPEGNYVKKWVPELINLPKEWLHQPWEAPEEILRQSGIELGI
D8UF46_VOLCA_295-494      DAHPFSYMM DLEKEARRFD PDGEYVRRWLPVLSRLPTEYIHGPWKAPPQVLAADVELGC
Q485Z2_COLP3_276-470      DAQPYFRI FNP I RQSERFD PKGVFIRKYIPELNNISDKAIHFPHQY-----IKDNELNI
** * : : : : . : ** . * : : : : * * : : . : : * * : . ** .

Q6MDF3_PARUW_270-470      NYPKPIVNHAKAREEALQAYSR
D8UF46_VOLCA_295-494      NYPAPIISHNDARVNVVEYACS-
Q485Z2_COLP3_276-470      YWPA-IVEHKEARLKALAFYKV
:* * : * . ** : . .

Q6MDF3_PARUW_270-470      YLRQIGWREFAHLLLYHFP-ETPQKPLRSQFNSFSWKNQKQNLKAWQKGTGYP IIDAGM
D8UF46_VOLCA_295-494      FLQQVGYREYSRYLSFHF P-FIHERSLLRHLRAC PWRIDQHAFKAWRQGQGTGYP IVDAA M
Q485Z2_COLP3_276-470      WLNEI IWREFYRHLLFHEQRLCKHQCYKENYQEMLWHNDAALFDAWCQGR TGYPLVDAAM
:*.: : ** : ** : * . : . : * : * : . ** : ** : ** : ** : **

Q6MDF3_PARUW_270-470      RQLWKIGWMHNRVRLIVGSFLVKDLMIHWIEGAKWFDWTLVDADLANNTMGWQW IAGCGA
D8UF46_VOLCA_295-494      RQLWSSGWCHNRARVVAASFLVKNLLLPWQWGLKHYWDAQIDADLECDALGWQYVSGGMS
Q485Z2_COLP3_276-470      RQLNQ TGMHNR LRMVVASFLTKHLLIDWRLGEKYFMQHLIDGDLASNNGGWAASTGC
** * . ** ** * : : . ** . * : : * * * : : : * . * * : ** : : .

Q6MDF3_PARUW_270-470      DAAPYFRI FNPITQGEKFDPEGNYVKKWVPELINLPKEWLHQPWEAPEEILRQSGIELGI
D8UF46_VOLCA_295-494      DAHPFSYMM DLEKEARRFD PDGEYVRRWLPVLSRLPTEYIHGPWKAPPQVLAADVELGC
Q485Z2_COLP3_276-470      DAQPYFRI FNP I RQSERFD PKGVFIRKYIPELNNISDKAIHFPHQY-----IKDNELNI
** * : : : : . : ** . * : : : : * * : : . : : * * : . ** .

Q6MDF3_PARUW_270-470      NYPKPIVNHAKAREEALQAYSR
D8UF46_VOLCA_295-494      NYPAPIISHNDARVNVVEYACS-
Q485Z2_COLP3_276-470      YWPA-IVEHKEARLKALAFYKV
:* * : * . ** : . .

```

Figure S9: Sequence alignment for the three CPF sequences Q6MDF3, D8UF46 and Q485Z2. The alignment has been realised at <https://www.genome.jp/tools-bin/clustalw>. It displays 67.2% of sequence similarity (43.8% of sequence identity) between Q6MDF3 and D8UF46, and 62.6% of sequence similarity (45.6% of sequence identity) between Q6MDF3 and Q485Z2 which explain the topology of the CPF and FAD phylogenetic trees. Sequence Q6MDF3 is classified as “Class III CPD Photolyase” by ProfileView, D8UF46 as “Plant Photoreceptor CRY” and Q485Z2 as “Class I CPD Photolyase”. Top: 66 positions in the alignment are colored in red/purple because they are positions in the **representative motif for Classes I & III CPD photolyase (Fig. S6)**. In 34 of these positions, the three sequences share the same amino acid and in 16 of them (purple), sequence D8UF46 does not share the amino acid with Q6MDF3 and Q485Z2, suggesting that Q6MDF3 and Q485Z2 are functionally closer sequences than Q6MDF3 and D8UF46, as suggested by the phylogenetic tree of CPF sequences (Fig. S3). Bottom: 83 positions in the alignment are colored in blue/cyan because they are positions in the **representative motif for Plant Photoreceptor CRY (Fig. S5)**. In 43 of these positions, the three sequences share the same amino acid and in 17 of them (cyan), sequence D8UF46 does not share the amino acid with Q6MDF3 and Q485Z2, suggesting that D8UF46 is functionally distinct from Q6MDF3 and Q485Z2.

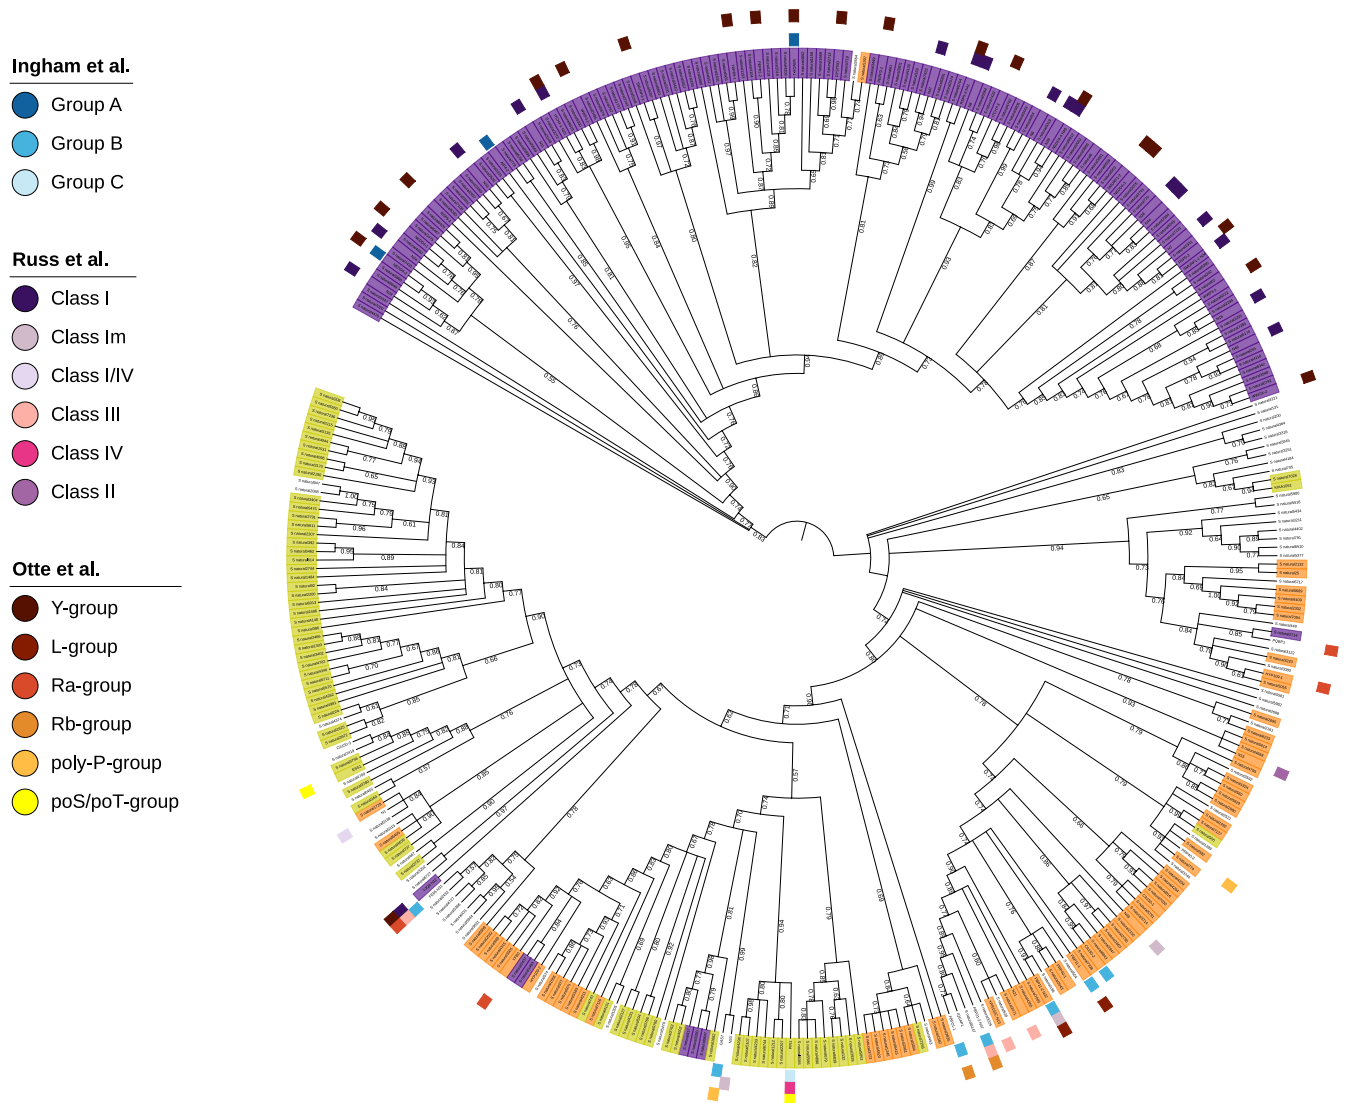

Figure S10: **Phylogenetic tree for WW domains.** The phylogenetic tree for WW domains shows that sequences classified in the same group by ProfileView appear in different subtrees, often scattered in the tree. The same holds true for those sequences known to represent the same functional class for Ingham, Russ and Otte's classifications.

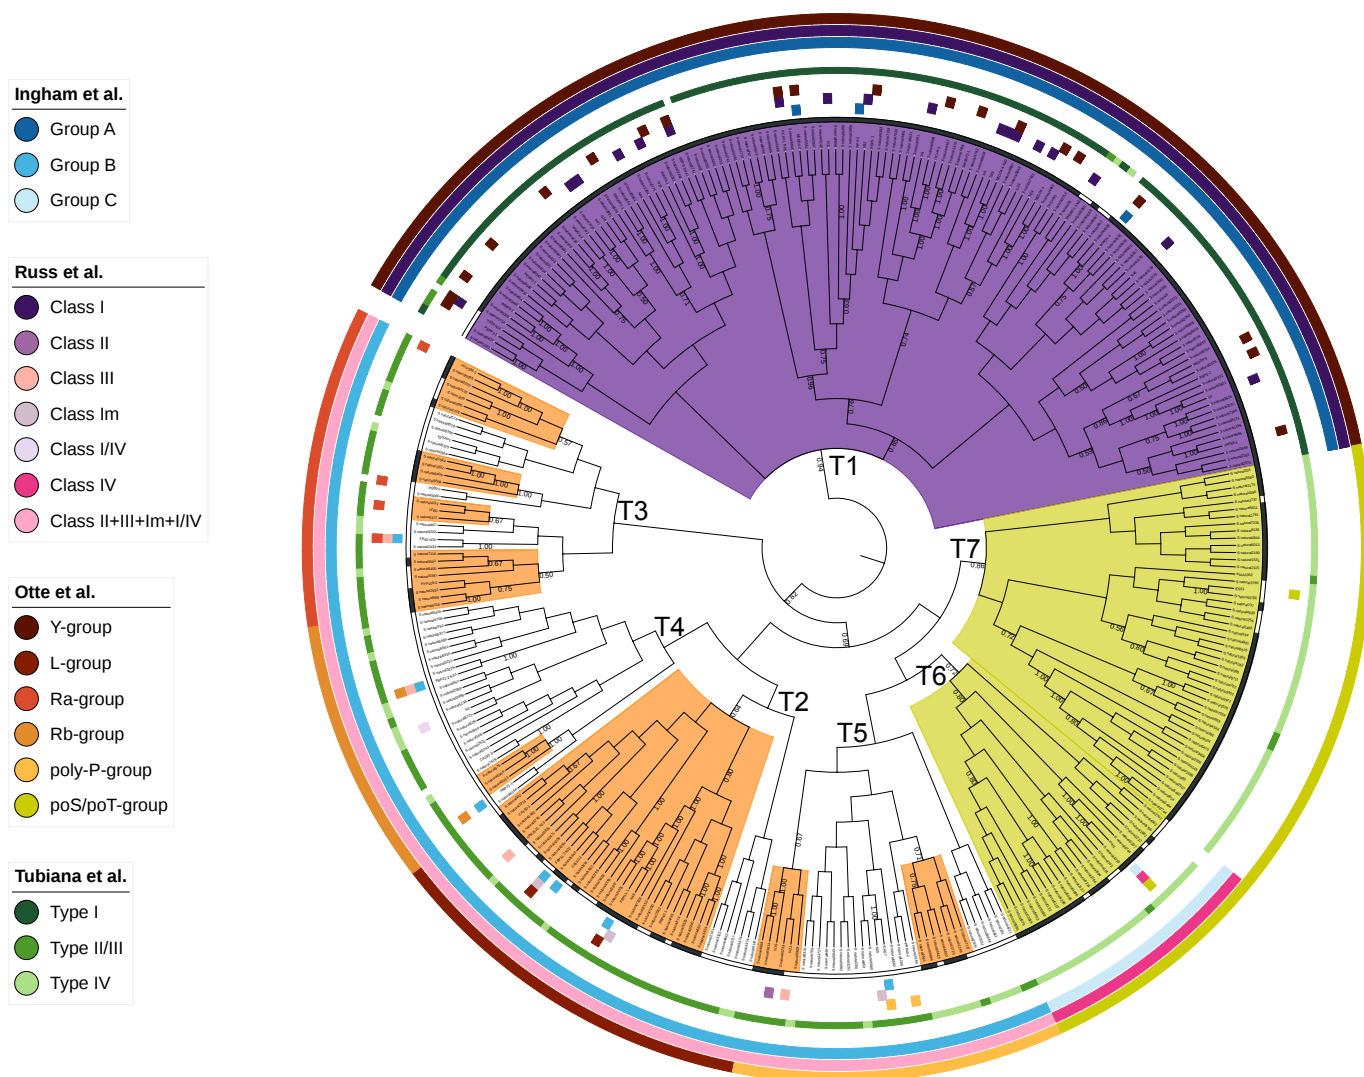

Figure S11: ProfileView tree for WW domains; compatibility with experimental and computational classification. Larger size of Fig. 5D.

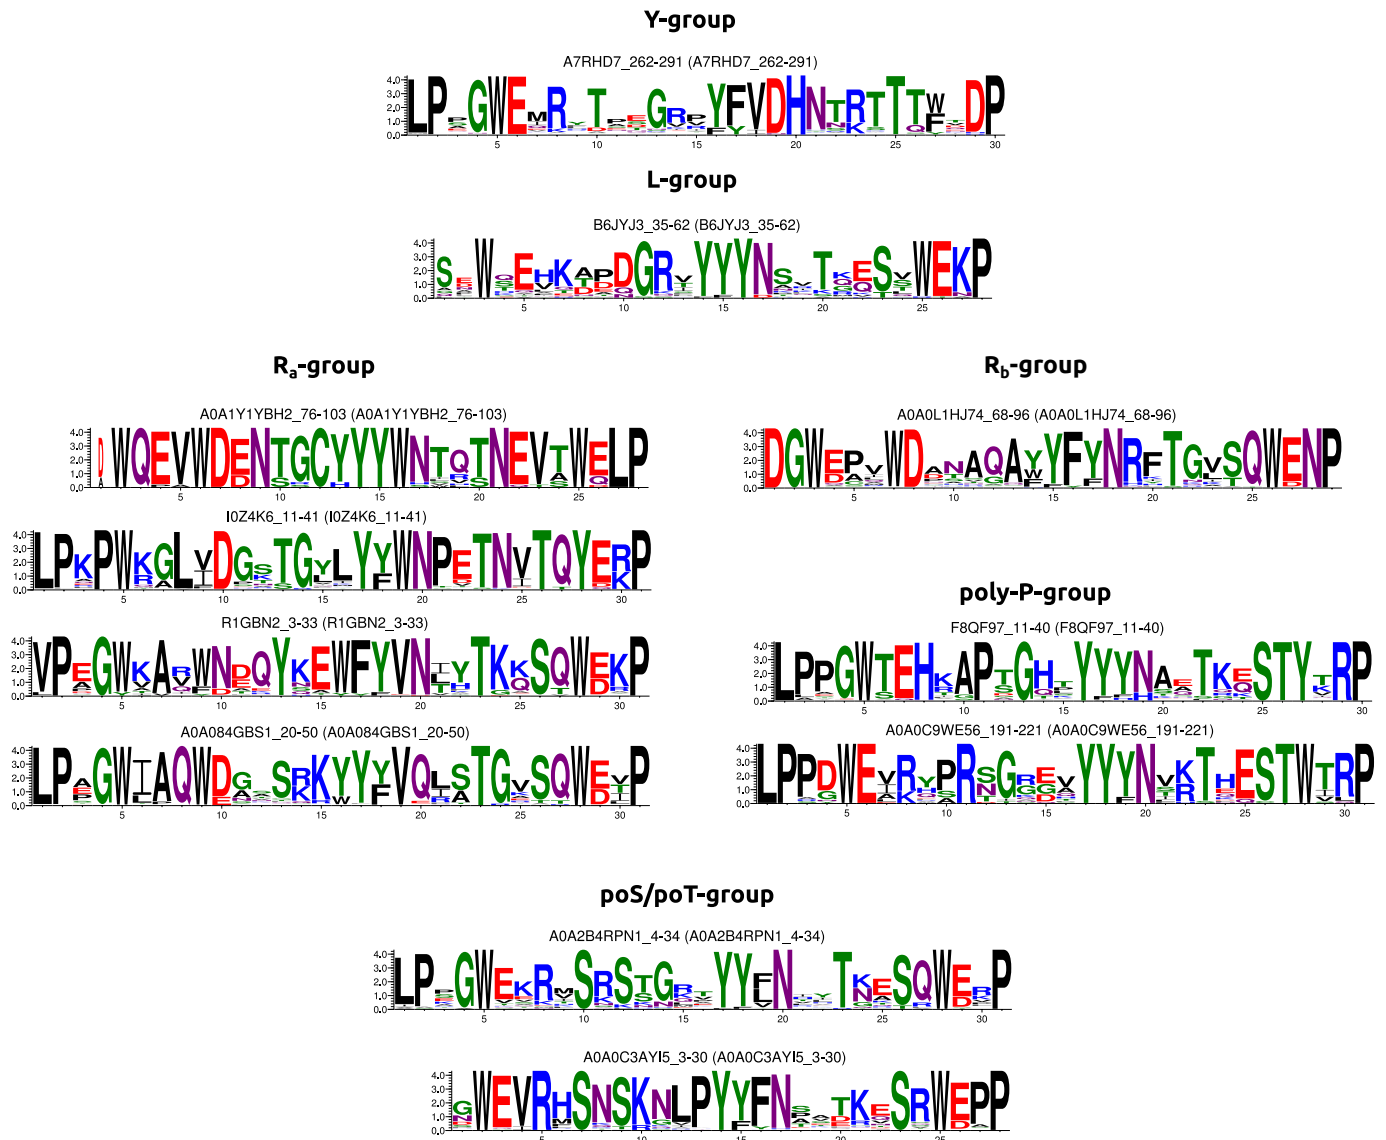

Figure S12: **Representative models in ProfileView tree of WW domains.** Models are representative of the sequences organised in the colored subtrees of **Fig. 5**. For Otte's classes containing more than one representative model, the order, from top to bottom, corresponds to subtrees read anticlockwise in the outer circle (brown scale) of **Fig. 5**, corresponding to Otte *et al* classification.

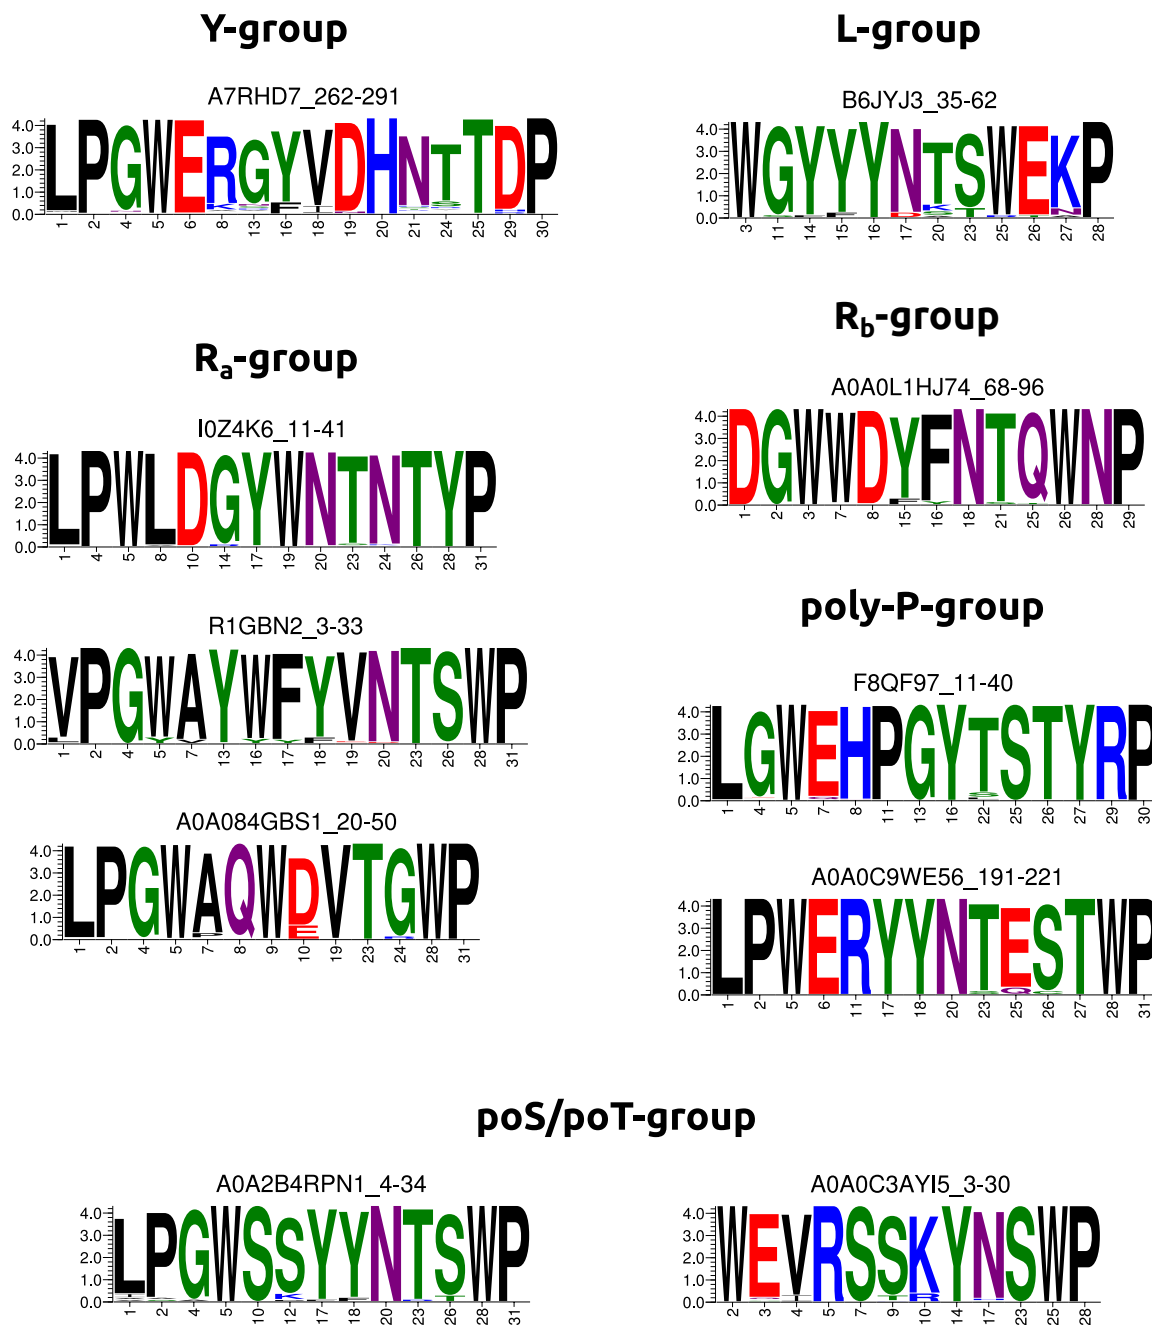

Figure S13: Ten motifs for 11 subtrees in the ProfileView tree of WW domains, based on *hhblits* conservation criteria. Each motif for a group is represented by the most conserved positions in the corresponding representative model, that is positions showing > 60% frequency for *hhblits* in the associated alignment (see Methods). Notice that by using the *hhblits* criteria, one of the R<sub>a</sub> models does not provide any conserved motif (this is due to the very low number of sequences in the alignment generating the model, 20, and to the length of the model). Compare to **Figure S14**.

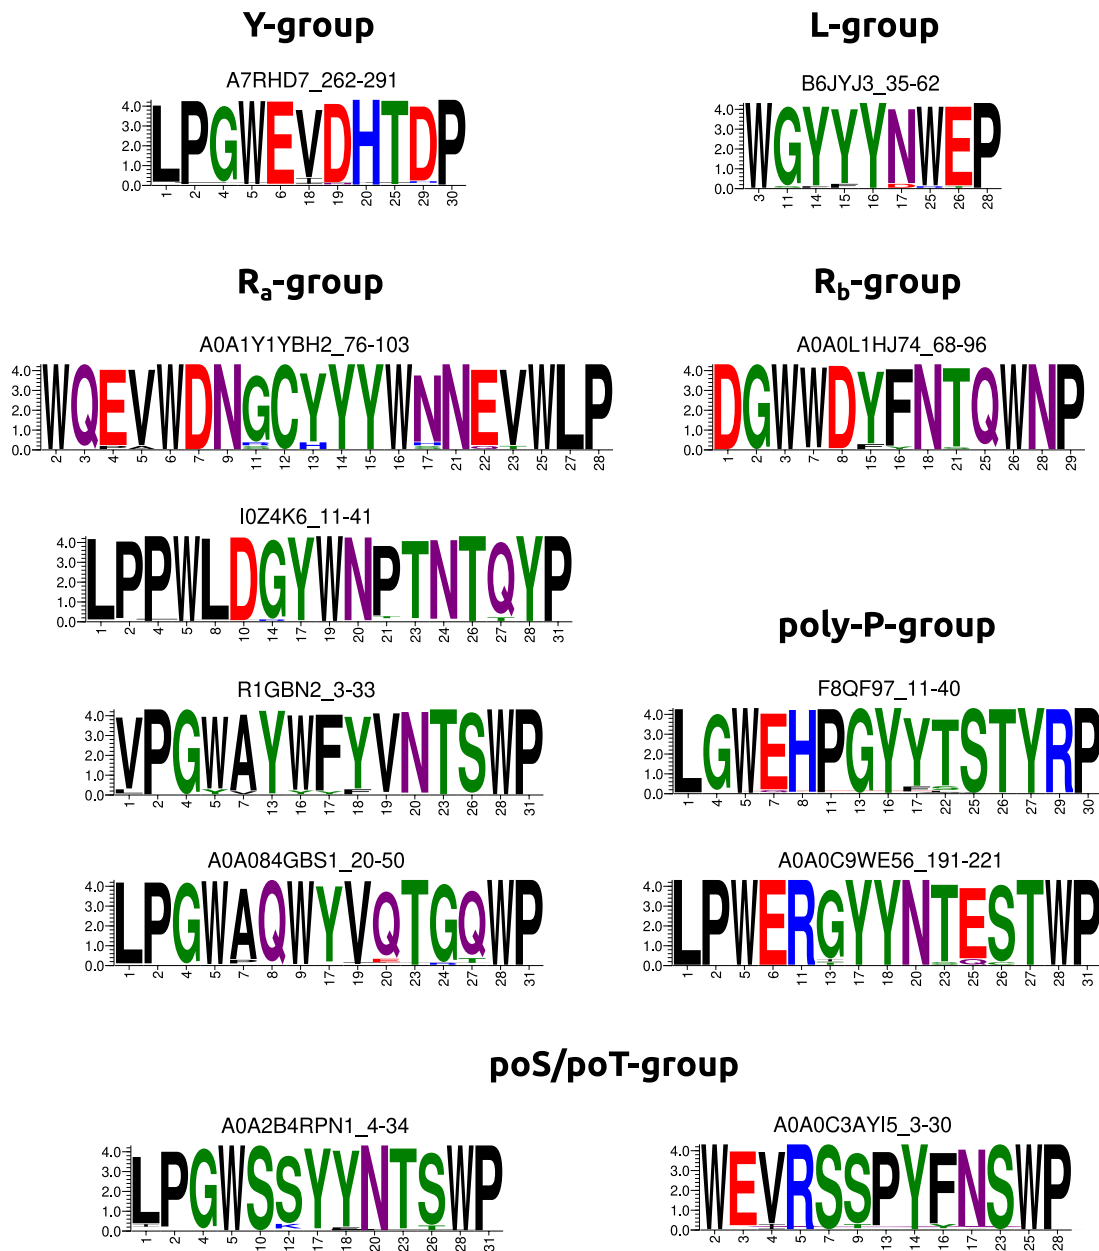

Figure S14: **Eleven motifs for 11 subtrees in the ProfileView tree of WW domains, based on amino acid counting.** Each motif for a group is represented by the most conserved positions in the corresponding representative model, that is positions showing > 90% amino acid frequency (excluding gaps) in the associated alignment (see Methods). Note that this conservation criteria recovers 4 motifs for the R<sub>a</sub> group. Compare to **Figure S13**.

Tree scale: 10

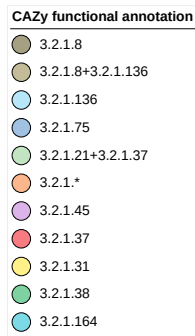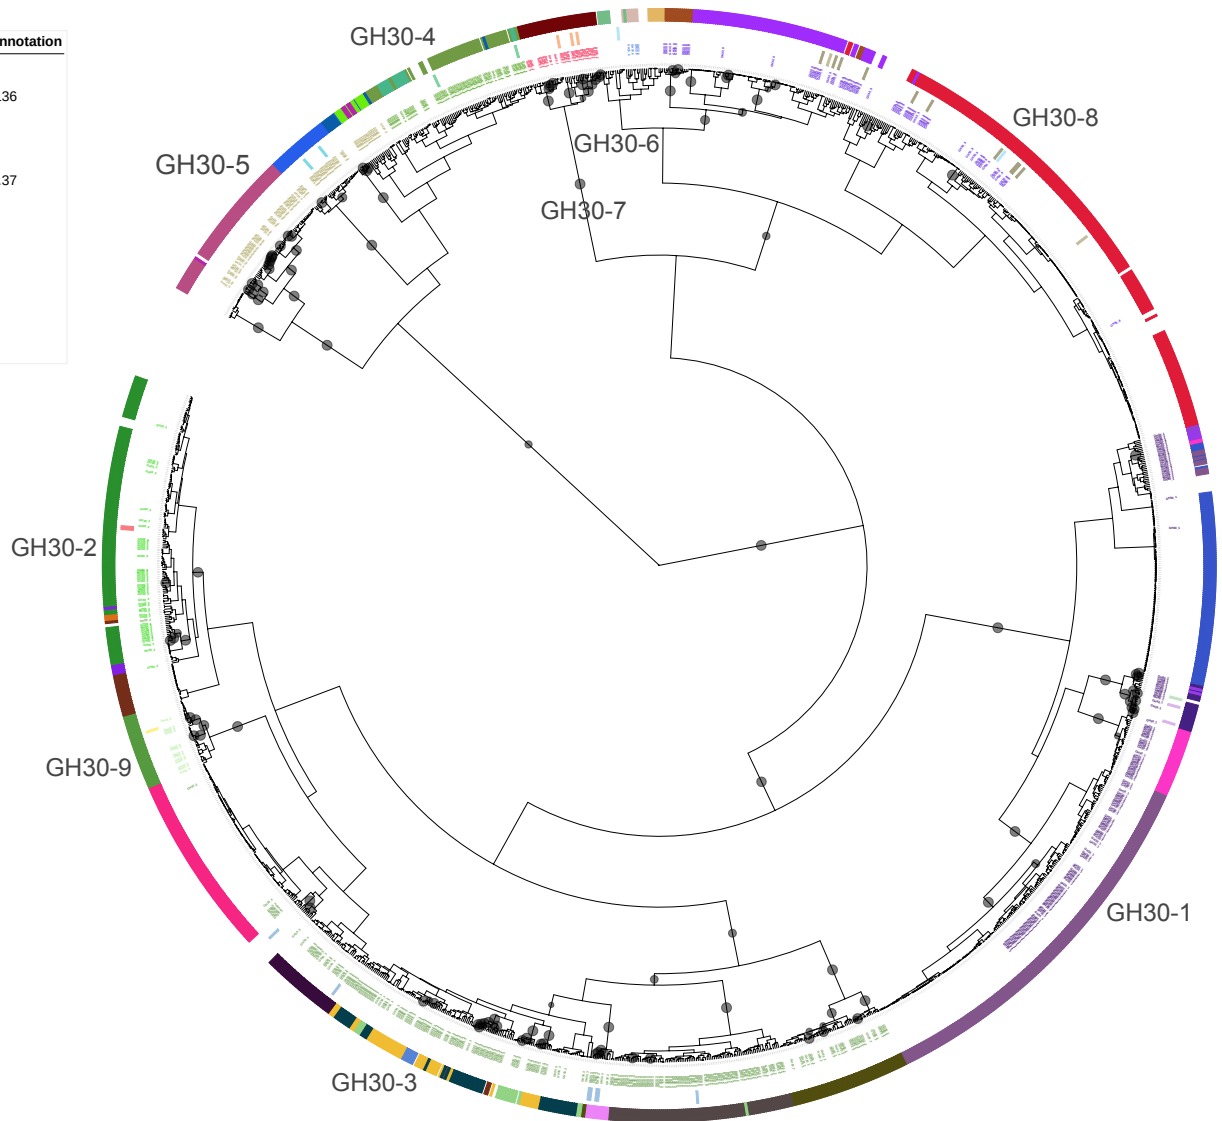

**Figure S15: ProfileView tree of GH30 sequences.** The tree is based on the construction of models for the two pfam domains PF02055 (Glyco\_hydro\_30) and PF14587 (Glyco\_hydr\_30\_2). Black dots in the tree indicate the existence of representative models separating at least 75% of the sequences in the subtree (note that lowering the threshold to 50% provides comparable results). The first external ring contains the labels of CAZy subfamilies (GH30\_1,..., GH30\_9), also indicated in larger characters on the annotated tree for an easier reading. Sequences and their classification correspond to those used in Figure 3 of (Barrett and Lange, 2019). The second ring reports the existence of a "EC number" providing the functional annotation in CAZy. The EC numbers and their associated colours are indicated on the top left (GH30-1: 3.2.1.45 and 3.2.1.21+3.2.1.37; GH30-2: 3.2.1.37; GH30-3: 3.2.1.75; GH30-4: 3.2.1.38; GH30-5: 3.2.1.164; GH30-6: -; GH30-7: 3.2.1.\*; GH30-8: 3.2.1.8, 3.2.1.136, 3.2.1.8+3.2.1.136; GH30-9: 3.2.1.31). The third and most external ring reports CUPP clustering (Barrett and Lange, 2019). Different colours are used to indicate different CUPP clusters. See **Table S5**.

**HAD, Beta-PGM, Phosphatase Like**

- beta-phosphoglucomutase
- phosphonoacetaldehyde hydrolase
- phosphoglycolate phosphatase
- 2-haloacid dehalogenase
- 2-deoxyglucose-6-phosphatase
- glycerol-3-phosphate phosphatase

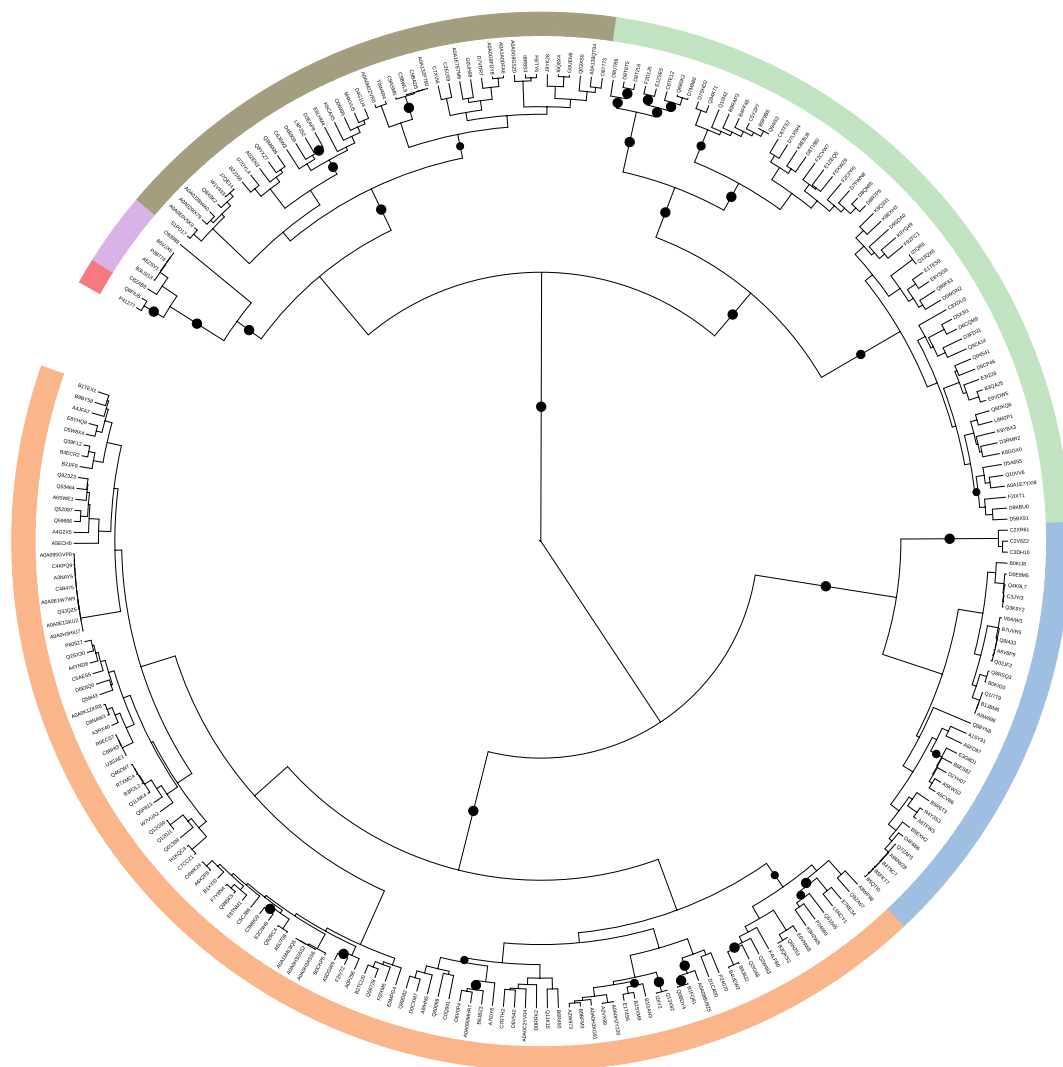

Figure S16: ProfileView classification tree of the HAD/ $\beta$ -PGM/Phosphatase-like subgroup of Haloacid Dehydrogenase in SFLD. Validation test of ProfileView performance. See Table S7.



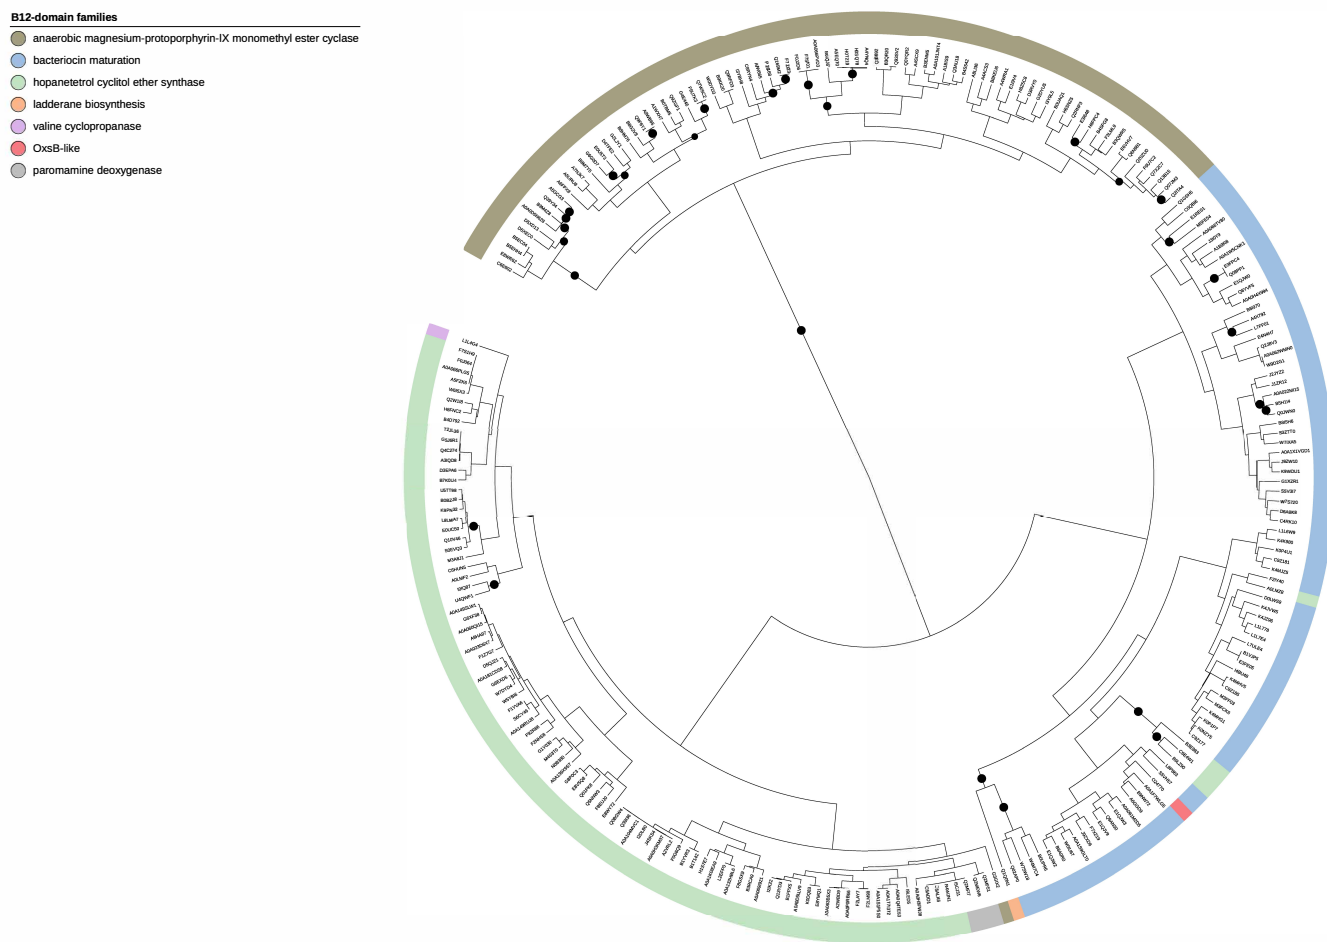

Figure S17: ProfileView classification tree of the B12-binding domain containing subgroup of Radical SAM in SFLD. Validation test of ProfileView performance. See Table S8.

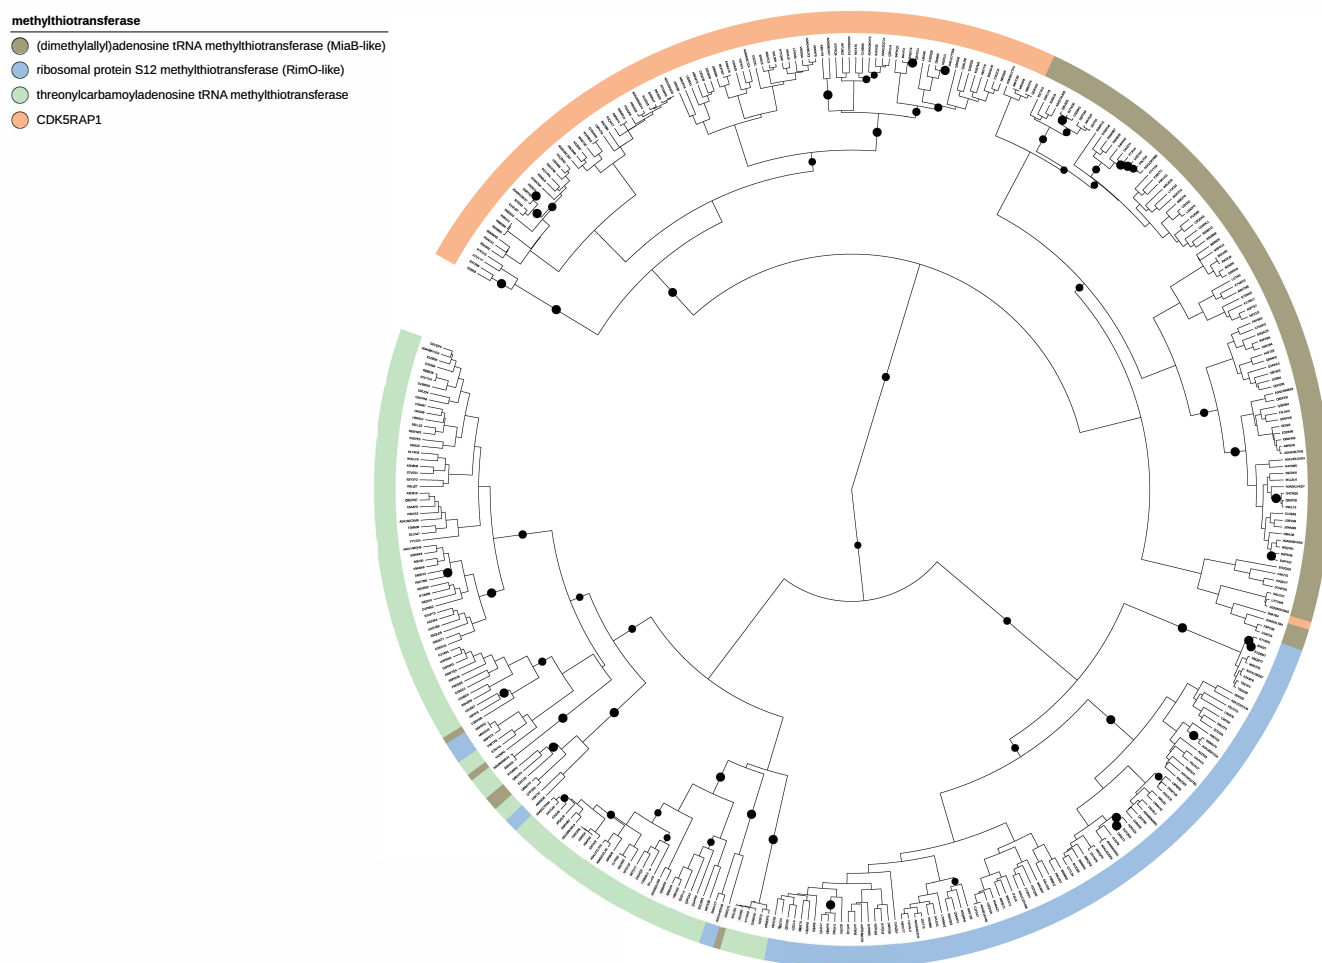

Figure S18: ProfileView classification tree of the Methylthiotransferase subgroup of Radical SAM in SFLD. Validation test of ProfileView performance. See Table S9.

**SPASM/twitch domain containing**

- coenzyme PQQ synthesis protein E (PqqE-like)
- KxxxW cyclic peptide maturase (StrB-like)
- adenosyl-hopene transferase
- UDP-N-acetyl-tunicamine-uracil synthase (TunB-like)
- cytosylglucuronate decarboxylase
- neomycin C-like epimerase
- pcfB-like

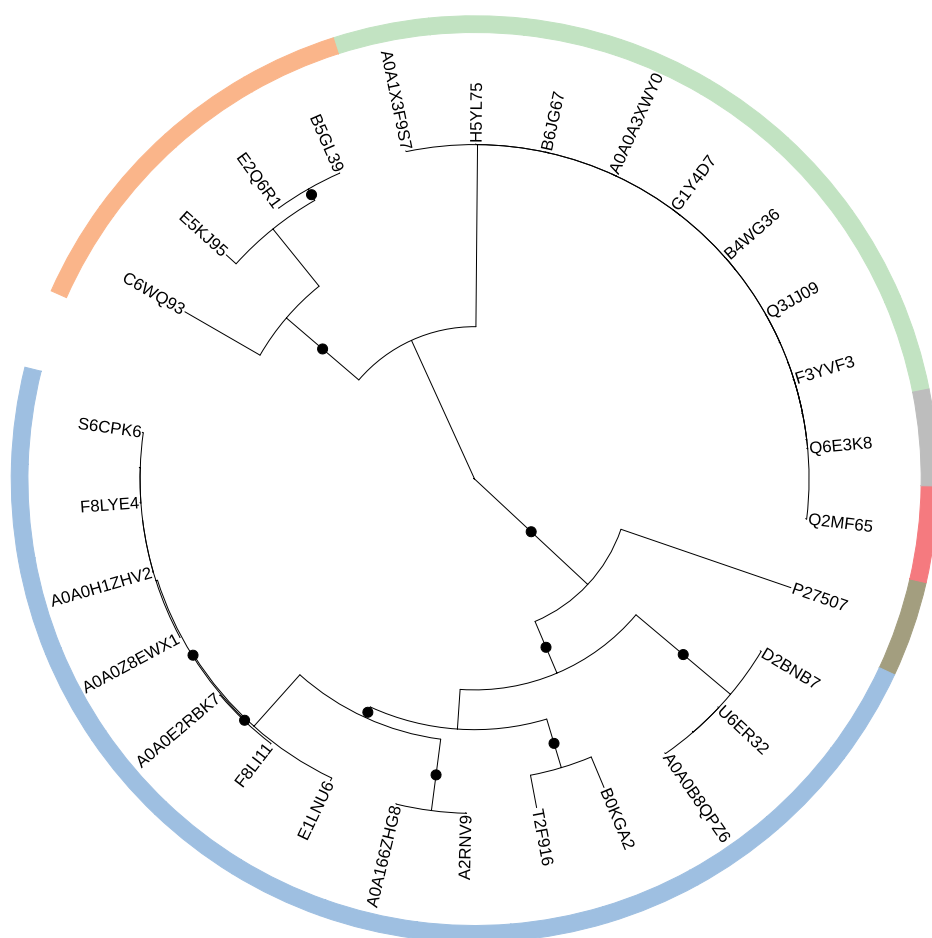

Figure S19: ProfileView classification tree of the SPASM/twitch domain containing subgroup of Radical SAM in SFLD based on the SPASM domain. Validation test of ProfileView performance. See Table S10.



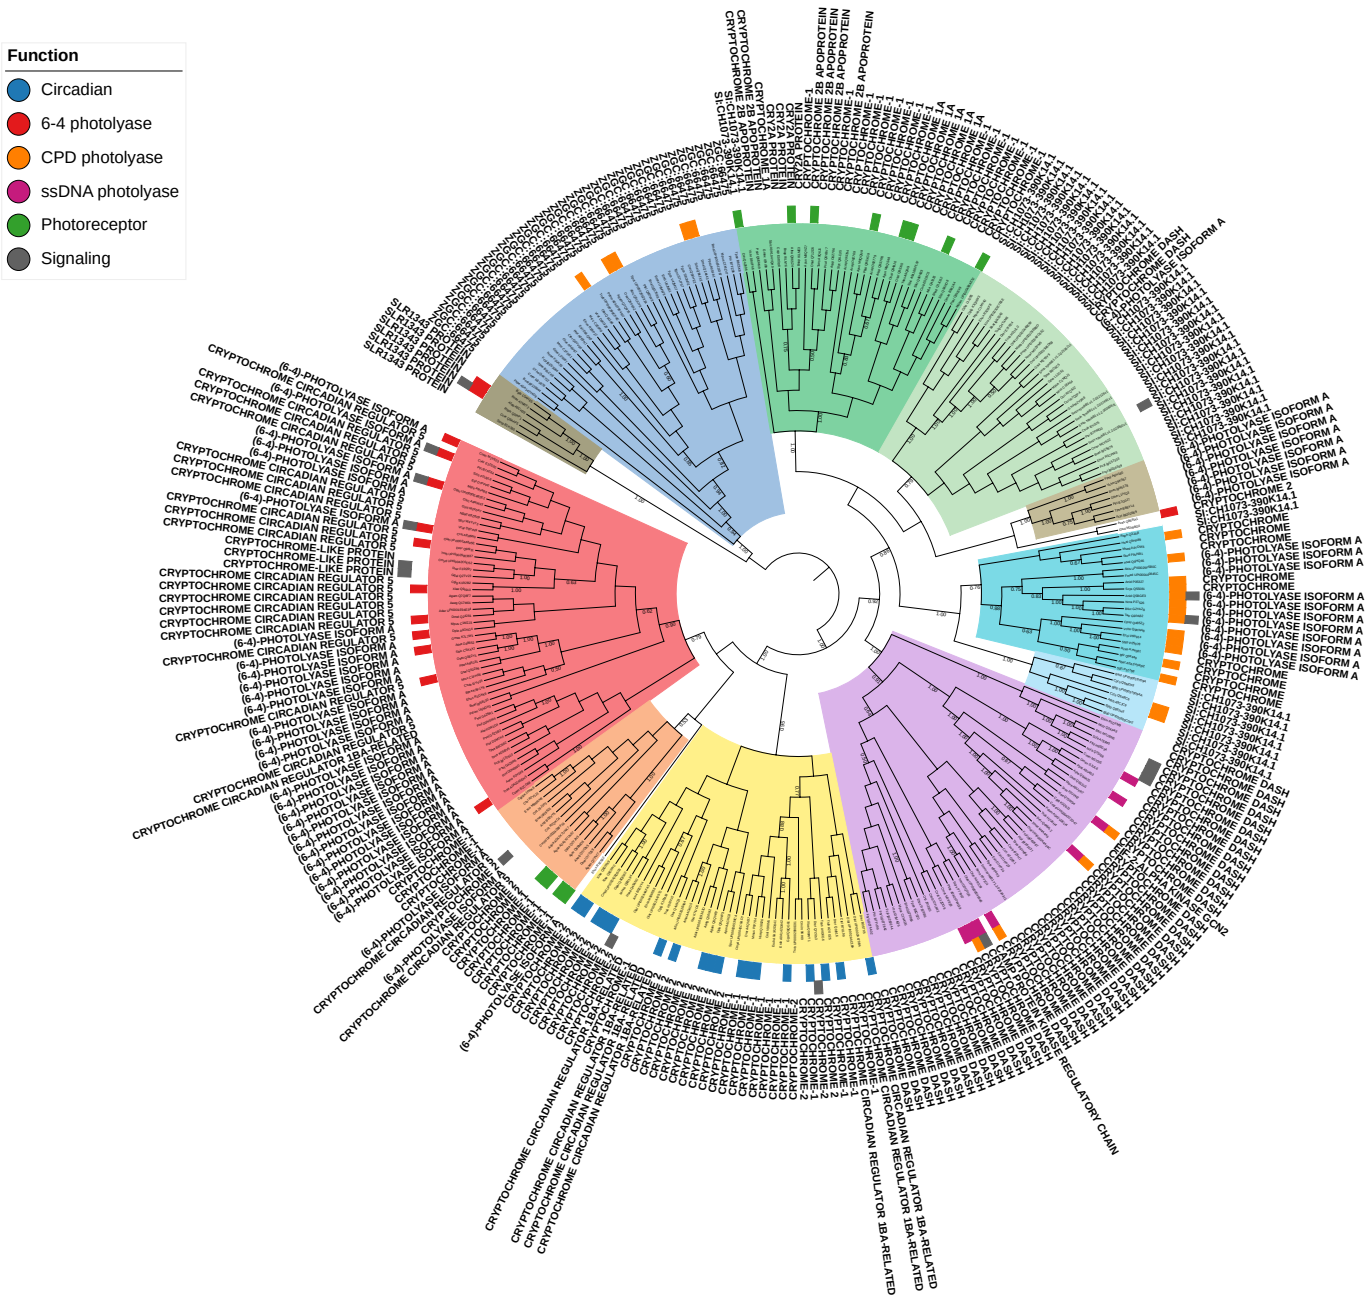

Figure S21: ProfileView classification tree of CPF sequences and PANTHER classification. The PANTHER classification of CPF sequences is plot on the external ring of the CPF ProfileView classification tree (Fig. S1).

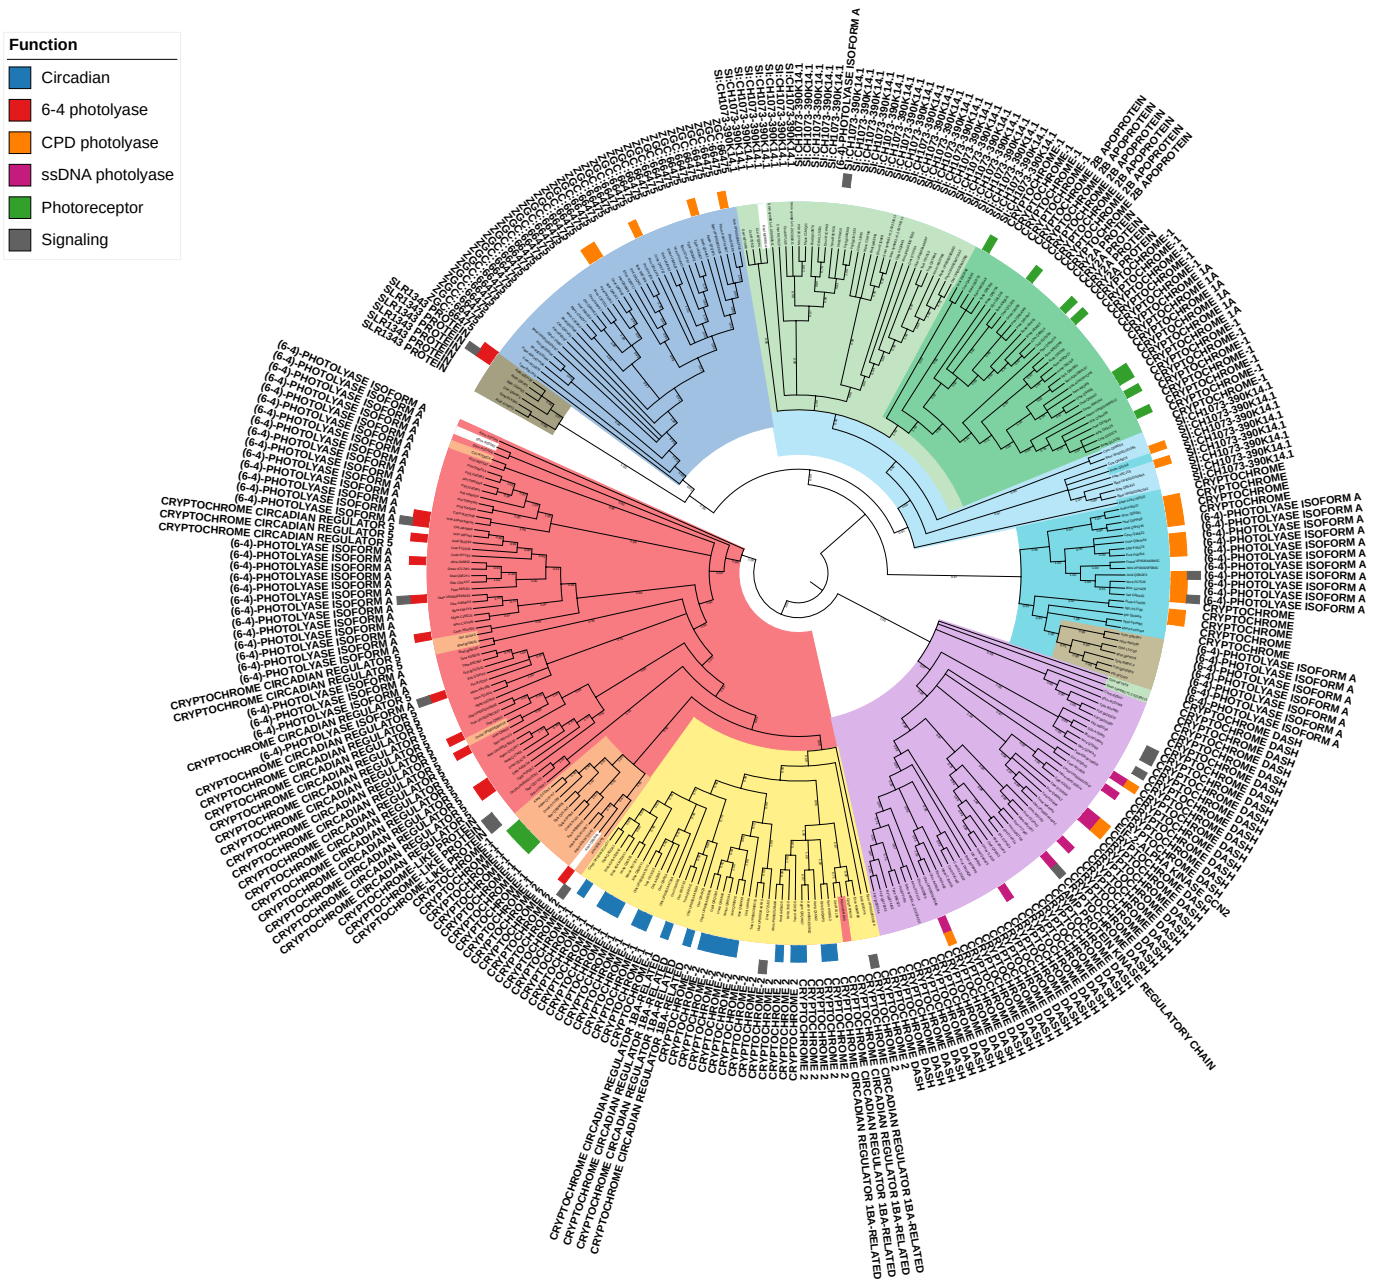

Figure S22: Phylogenetic tree of CPF sequences and PANTHER classification. The PANTHER classification of CPF sequences is plot on the external ring of the CPF phylogenetic tree (Fig. S3).

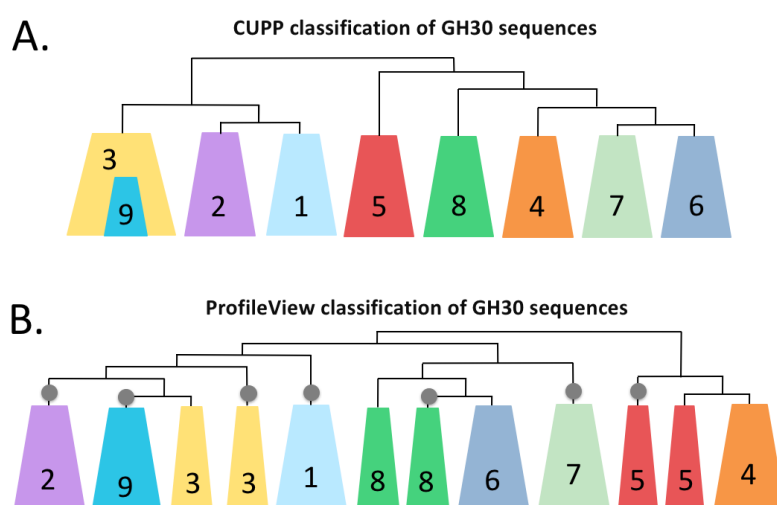

Figure S23: **Schemas of the CUPP and ProfileView trees on GH30 sequences.** A. Topology of the CUPP tree reported; reproduced from Figure 2 in (Barrett and Lange, 2019). B. Topology of the ProfileView tree. Colors and numbers correspond to GH30 subfamilies.

Tree scale: 10

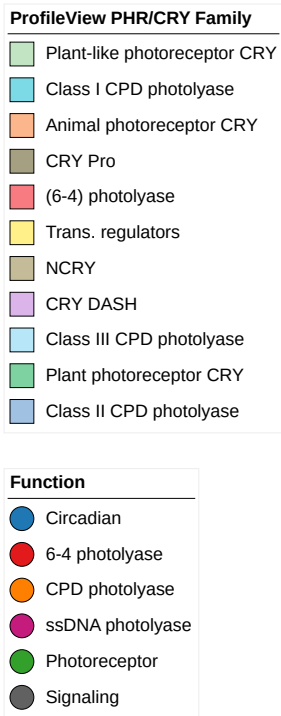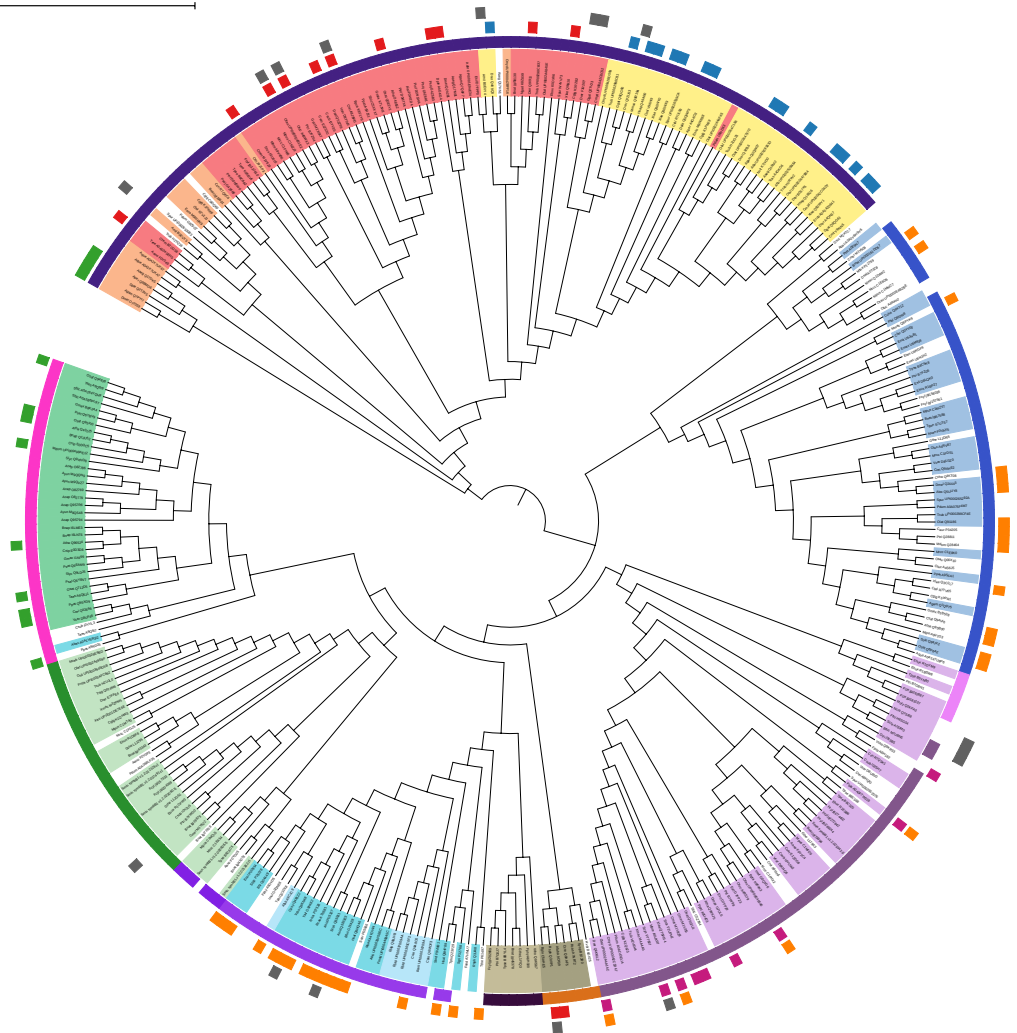

Figure S24: **CUPP tree of CPF sequences, constructed with FAD sequences.** Sequence names in the tree are coloured with ProfileView classification (with the same colour assignment of **Fig. S1**). CUPP clusters are represented by the first layer of colours around the tree (in clockwise order: dark purple, blue, pink, light purple, brown, black, violet, green, fuchsia). The two most external layers correspond to the experimental classification coming from the literature. The same information was used for ProfileView performance analysis. Compare to **Fig. S1**.



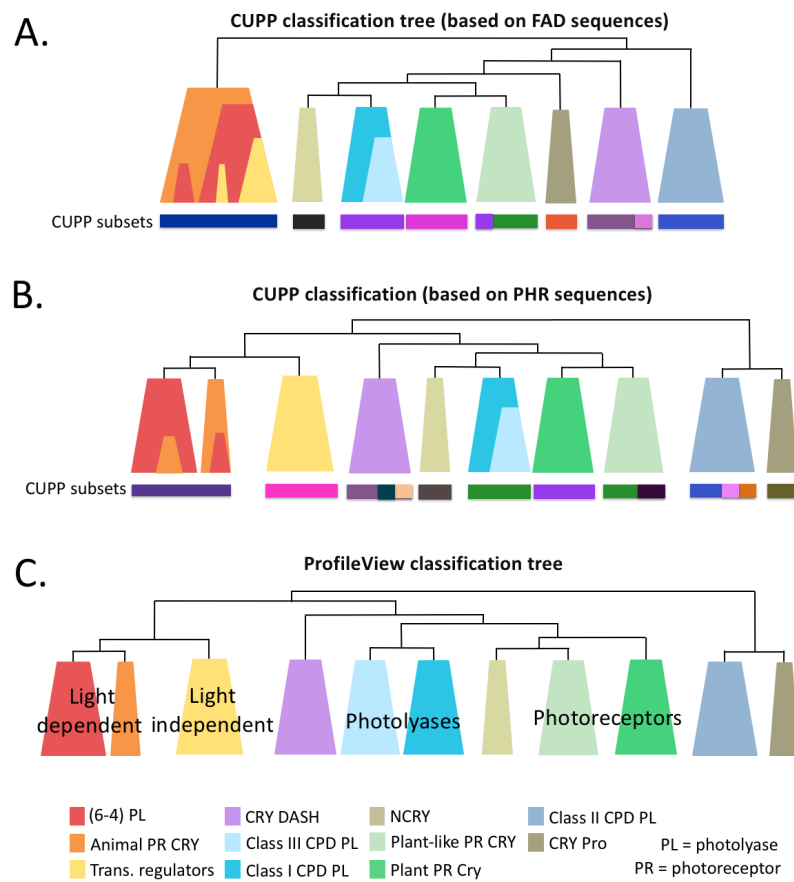

Figure S25: Schemas of the CUPP and ProfileView trees on CPF sequences. A. Topology of the CUPP tree constructed on FAD sequences. B. Topology of the CUPP tree constructed on PHR sequences. C. Topology of the ProfileView tree constructed on FAD sequences; taken from **Fig. 3** for an easy comparison.

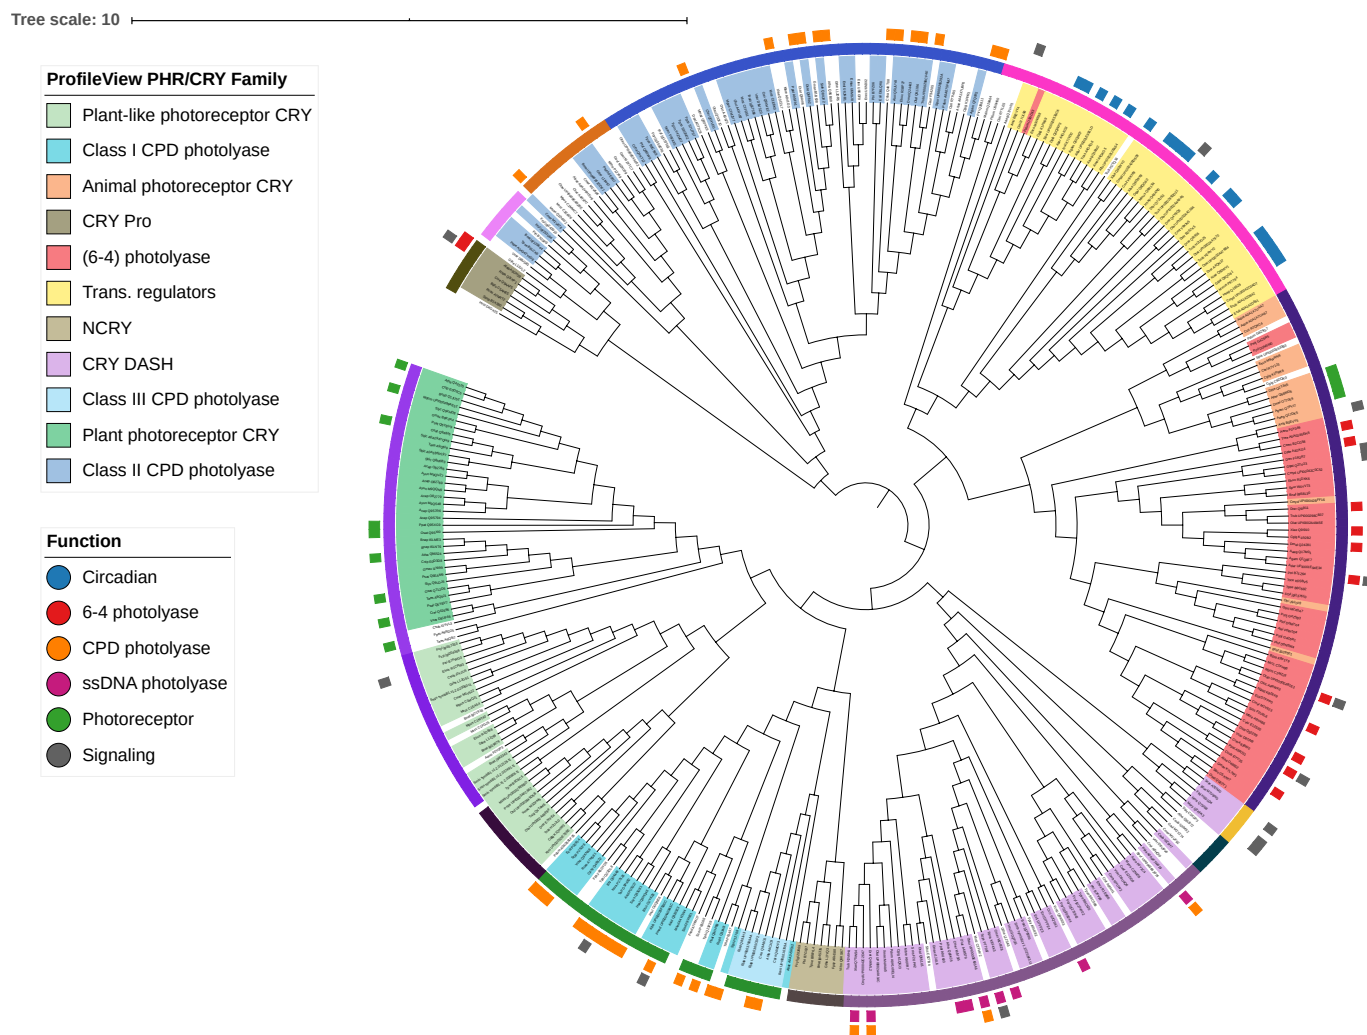

Figure S26: CUPP tree of CPF sequences, constructed with PHR sequences. See legend of Figure S24.

Tree scale: 1

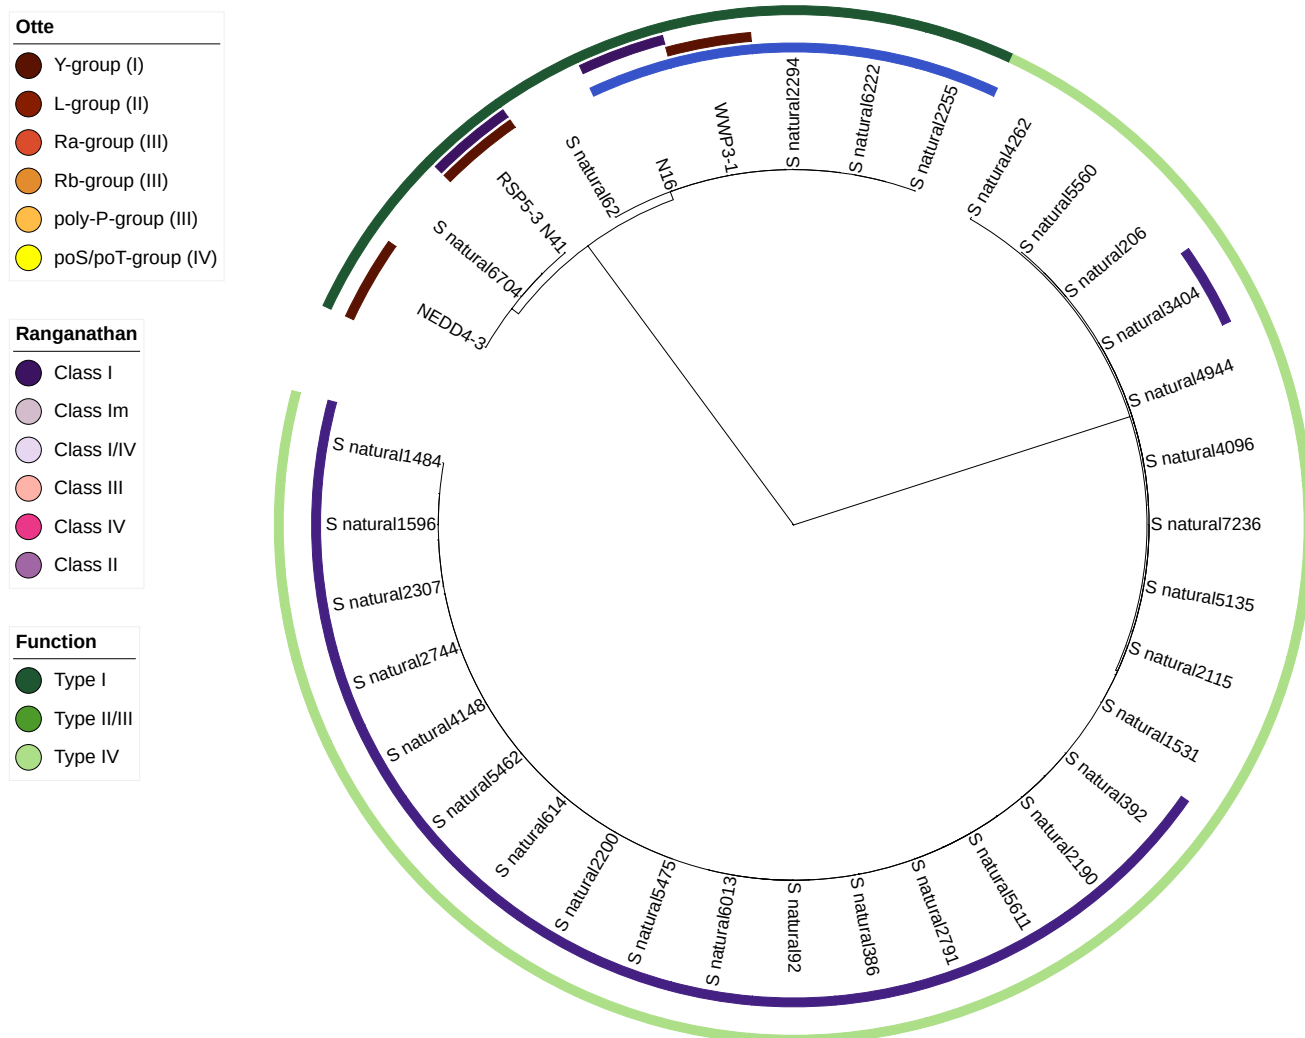

Figure S27: CUPP tree of WW domain sequences.

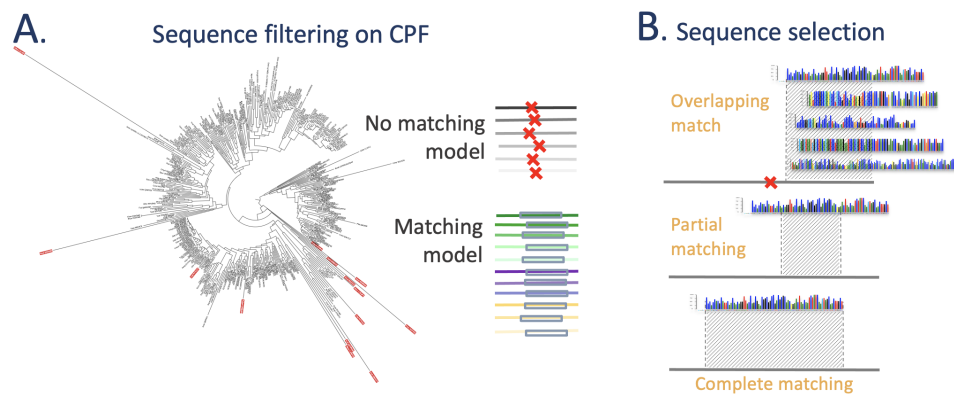

Figure S28: **Sequence filtering and sequence selection in ProfileView pipeline.** A. Phylogenetic tree of CPF input sequences where filtered sequences (that is sequences with no match of the FAD domain) are highlighted in red. Note their long branch length. B. The three types of matches between a model and a sequence used to select sequences in ProfileView. The hit, between a motif and a sequence, might involve the extreme of a sequence (top - overlapping match) or an internal region of the sequence (middle and bottom). For this latter, the motif might match the sequence only partially (middle - partial matching) or fully (bottom - complete matching).

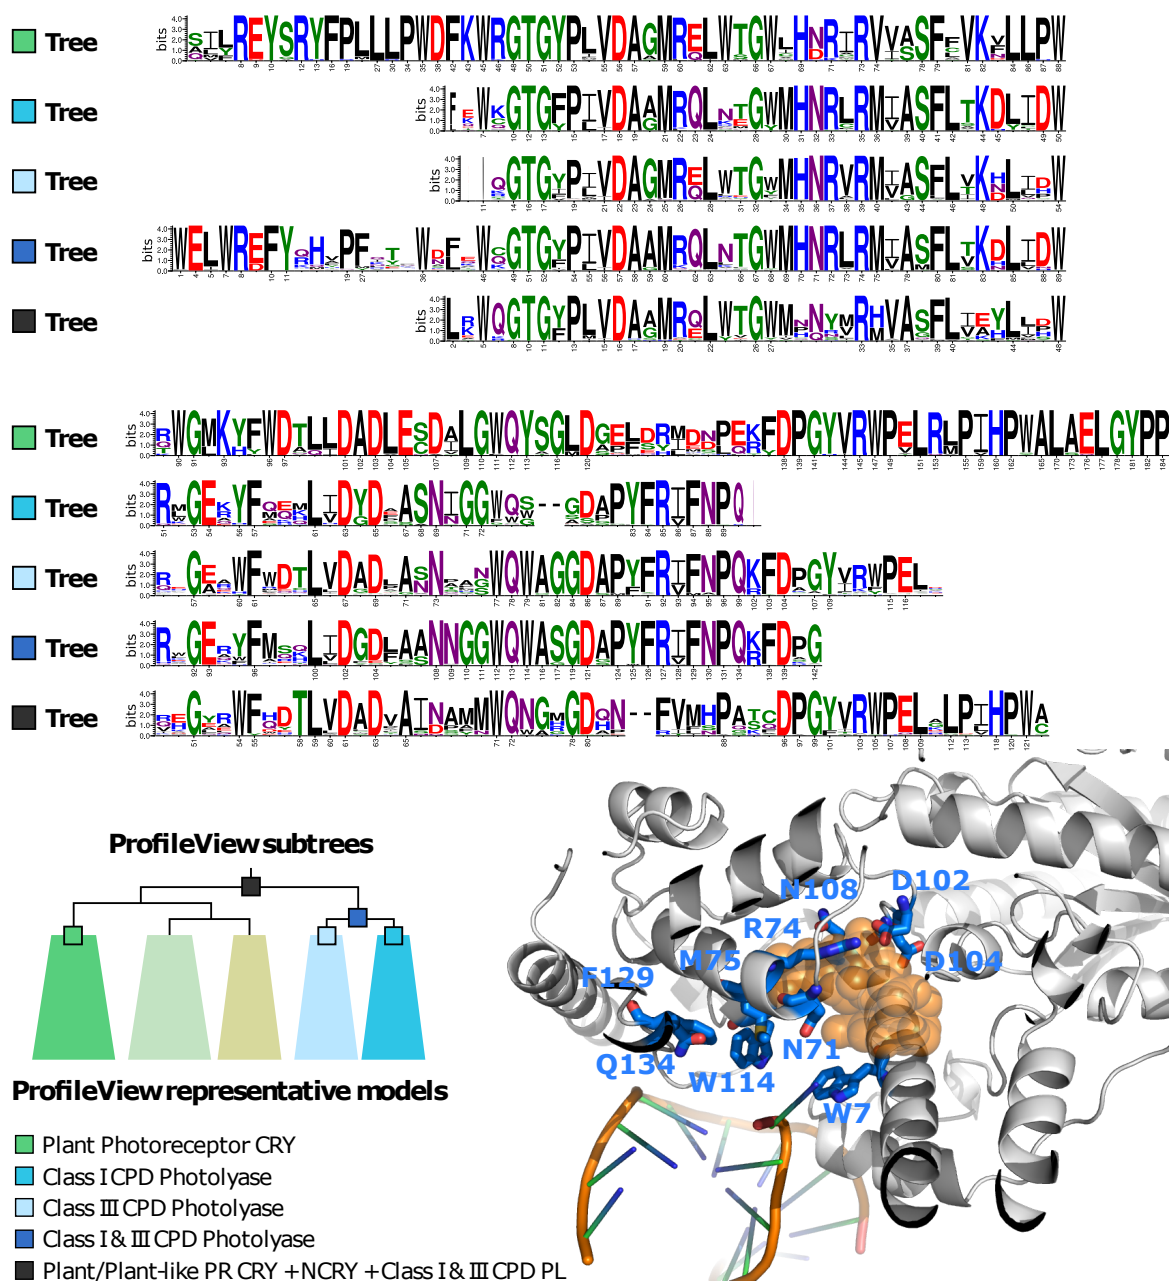

Figure S29: Five motifs for 5 subtrees in the ProfileView tree of the CPF family. Five representative models associated with internal nodes in the ProfileView tree are aligned. Numbered positions correspond to conserved positions belonging to the associated representative motif. The absence of the number indicates less conserved positions. The alignment has been constructed using plant PR as a template model and all others as query models. Neither plant-like PR CRY nor NCRY models were considered because no functionally characterised sequences are known for these models. The NCRY motif (associated with the beige subtree on the bottom) was not added because no functional information is available for comparison (see Fig. S2). The length of a motif depends on the length of the associated model, selected as best representing the sequences in a subtree. The PDB structure (1TEZ) highlights residues in interaction with DNA (W7, N71, W114 at  $< 5\text{\AA}$ ) and the FAD substrate (W7, N71, R74, M75, D102, D104, N108 at  $< 5\text{\AA}$ ). All residues highlighted in the structure have been explained in the text.
